# Supplementary material for: A cell wall synthase accelerates plasma membrane partitioning in mycobacteria
Source: eLife journal article supplement (doi:10.7554/elife.81924), 2023-09-04
Supplement: supp [file elife-81924-supp-v1.zip]

PBP1a\_e.coli/1-  
ponA1/1-827  
ponA2/1-817

1VNNEGRHSRSTDDAREAAAGRLGARENRLANPPRPPVPPRSAYVPPDDRLLTAVLPPVRDGDIAAPPIDVVRAALEGSPPPKPPPPPPPPGRGG

90

PBP1a\_e.coli/1-  
ponA1/1-827  
ponA2/1-817

1---MKLNGKFPPVKFVKYFLI~~LA~~VCCILLGAGS---IY-----GLYRYIEPQLPD~~VA~~---TLKDVRLQIPMQIYSAD~~GELIA~~QYG-70  
91GGPSGPGGSPGPGR--QFR--~~IN~~NWKWVRRGSAIAVAVMVLLPLITFGMAYMIVD--~~VP~~---EPGDIRTPQVSTILASD~~GSEI~~ARIVP168  
1-MPELPTGPSAQPPRAVIVIK~~LA~~WCCLLASVLA--AALMFVV-GGFGLSNRSAD~~V~~VANGSAALVEGEVPQVSTMVDAK~~GNTIA~~WLY-84

↓ Transglycosylase

PBP1a\_e.coli/1-  
ponA1/1-827  
ponA2/1-817

71-EKRRIPVTL~~DQI~~PP~~EMVKAFI~~AT~~SS~~SRFYEHHGVD~~PVGIFRA~~ASVA~~FS~~GHASQ~~GASTIT~~QQLARNFFLS-----PERTLMR147  
169PEGNRVD~~VKIDQI~~PVHVRDA~~VMAA~~ED~~RD~~FYSNPGFSWT~~GFLRAIKNNL~~FGGGGLQ~~GGSTIT~~QQYVK~~NAL~~VGDER-----SGIGGLI250  
85-SQRRFEV~~PSEQI~~ANTMKL~~AI~~VS~~IED~~KRFAEHNGVDWQ~~GT~~LT~~EL~~SGY~~LSGN~~PDTR~~GGSTIE~~QQYVK~~NY~~QLLVVAQTDAERRAAIETTPAR173

PBP1a\_e.coli/1-  
ponA1/1-827  
ponA2/1-817

148KIKEVFLAIRIEQLLT~~KDEI~~~~LELY~~LNKIYLG~~YRAYGVGA~~AQV~~YFG~~KTV~~DQLTL~~NEMAV~~IAGL~~PKAP~~STFN~~LYSMDRA~~VARRN~~VLSRM237  
251KAKELVISTKMSG~~EWSKDA~~V~~LQAY~~LNIIYFGRGAYGISAASKAY~~ED~~KPVEQLDVAEGALLAALIQR~~PSTLD~~PAVDPEGA~~ADRWN~~VLDGM340  
174KLREIRMA~~LTLDK~~TFT~~PEI~~~~LTRY~~LN~~LVSF~~GNGAYGIQDA~~AQTY~~FGVNA~~SELNW~~QAA~~ALL~~AGMVQST~~SALN~~RYTNPDG~~ALAR~~NLVLDTM263

PBP1a\_e.coli/1-  
ponA1/1-827  
ponA2/1-817

238LDEGYITQQQFDQTRTEAINAN-----YHAPEI~~AF~~SAPY-----LSEMV--RQEMYNRYGESAYED~~GYRI~~~~YTTI~~TRKV~~QQA~~307  
341VDIGALSQADRDAQVFPPT-----V-----PPDY~~AF~~QQNQTTGPNGLIERQVTNELLDLFDINEQTLNTEGLQITTTIDPKAQEAA416  
264IQNIPQEAELRAAKEQPLGILPQPNELPRGCIAGDR~~AF~~FCDY-----VLEYL--ARAG--ISKEQVAKG~~GYLIK~~TTLD~~PDVQ~~SSV341

PBP1a\_e.coli/1-  
ponA1/1-827  
ponA2/1-817

308QQ~~A~~VRNNVLDYDMRHGYRGPANVLWKVGESAWDNNKITDTLKALPTYGPLLPAAVTSANPQQATAMLADGSTVALSMEGVRRWARPYRSDT397  
417VD~~AVDK~~-----422  
342KSA~~IDSIA~~-----APDTPGVASVM-----SVIKPGKE-----SHPVL--AMASNRTYGLDT385

↓ Transpeptidase

PBP1a\_e.coli/1-  
ponA1/1-827  
ponA2/1-817

398QQGPTPRKVTDLVLTGQQIWVRQVGD~~AWWL~~AQVPEVNSALV~~SIN~~PQNGAVMALV~~GG~~FD~~FN~~QSKFN~~RATQAL~~RQV~~GSNI~~K~~PFL~~YTAAMD~~KG~~487  
423-----YLEGQDPDMRAAVVSIDPRTGGIKAYY~~CG~~S~~DANG~~FDFAQAG---LPT~~GS~~SF~~KVF~~ALVAALQ~~CG~~482  
386ERGETMQPPF-----SLV~~G~~-----NGAG~~SVFK~~IF~~TVAA~~MEM~~G~~419

PBP1a\_e.coli/1-  
ponA1/1-827  
ponA2/1-817

488LT~~L~~ASML-----NDVPISRWDASAGSDWQPKNSPPQYAG~~P~~IRLRQ~~G~~L~~GQSK~~NVVMVRAMRAMGV~~DYA~~--AEYLQRF~~GFP~~559  
420MG~~I~~NTQL~~P~~VPARFEAKGLSGGARGC~~PPAT~~WC~~VQN~~-----AGGYR~~G~~SM~~S~~VT~~DAL~~AT~~SP~~NTAFAKLISQIGVQR~~A~~--VDMAVRL~~CLR~~498

PBP1a\_e.coli/1-  
ponA1/1-827  
ponA2/1-817

560AQNIV-----HTESLA~~LG~~SASFTPMQVARGY~~AVM~~ANG~~G~~FLVD~~PWF~~ISKIENDQ~~SG~~VI~~FEAK~~PKVACPEC-DIP~~V~~627  
551-ESFPGVEHTLS-----EDGKGGPPNNGVV~~LG~~QYQSRVLD~~MASAYAT~~LAAS~~G~~VYHK~~PHF~~VEKVVN~~SS~~QV~~LF~~DASKEDN~~GEERID~~KAV632  
499SYAQPGTARDYDPESSESLADFVKRQNI~~GSFT~~~~LG~~PIEVNALELSNVA~~ATL~~ASG~~G~~TWC~~PP~~NPIAQVVD~~RNE~~NEVA-----VTTETC-EQV~~V~~582

PBP1a\_e.coli/1-  
ponA1/1-827  
ponA2/1-817

628IYGDTQK-SNVLENNDVED--VAISREQQNVSVMPQLEQA-----NQALVA--KTGAQEYAPHVIN--TPLAFLIKSALNT~~NIF~~FGEP703  
633AD-----NV-----TSAMQPIAGWSRGH-----~~NLA~~---653  
583PEGLANTLANAMSKDDTGS~~GTA~~ASAGSVGWNLPMSGKTGTTEDNRSSAFLGFTNQYAAANYIYDDSPNPSELCSFPLRQC~~SGSNL~~FGG-671

PBP1a\_e.coli/1-  
ponA1/1-827  
ponA2/1-817

704GWQGTGWRAGRDLQRRDIGGKTGTTN~~SSKDAWFS~~GYP-----GVVTSVWI~~G~~FDDHRRNLGHTT~~ASGA~~-----766  
654-----GGRPSAAKTGT~~VQL~~GDTGDNRDA~~WMVGYTP~~-----SLSTAVWV~~CTTE~~GVKPLVN~~KWGS~~PIYGSGL713  
672-----NEPART~~WFT~~AMK~~PI~~AESFGPV~~ALPPT~~DP~~RYVD~~GGPGSRVPSVS~~ELTE~~EAARQLKE~~AGFQ~~-----731

PBP1a\_e.coli/1-  
ponA1/1-827  
ponA2/1-817

767IK~~D~~QISGYEG~~GA~~KS~~A~~-----Q~~PAW~~---DAYM-KAVLE~~G~~V~~PEQ~~LT~~PP~~~~P~~GIVTVNIDRST~~GQL~~-----819  
714PS~~D~~IWKATMD~~GA~~LE~~G~~TDVESF~~R~~KPT-----EIGGYAGV~~PQA~~PAAPP~~P~~SAGPP--TDPGQPSVTVIQPTIEVAPGITIPIGPPTTPV793  
732VAD~~Q~~ASYVNS~~GA~~RSCTVVGTT~~PS~~GQTIPGSIITIQLSN~~G~~I~~PPP~~-----~~PP~~--PVNIPLPG~~C~~PPEIGQT---V-----VEIPGLPPITVPV807

PBP1a\_e.coli/1-  
ponA1/1-827  
ponA2/1-817

794GPPPGAPGAPVGP~~G~~AP~~E~~VPVAPGAPGVPGAPPPP827  
808LGPP-----PPPPPP817
