# Supplementary material for: A cell wall synthase accelerates plasma membrane partitioning in mycobacteria
Source: eLife. 2023 Sep 4;12:e81924. doi: 10.7554/eLife.81924 (PMC10547480; doi:10.7554/eLife.81924)
Supplement: Supplementary file 2. [file elife-81924-supp2.xlsx]

## Sheet: DMSO vs benzyl alcohol
#utest
#GUI with: norm=TTR, includeZeros=True, output=C:\Users\takek\OneDrive - University of Massachusetts\1. Experiments\analyze\for Tn-seq\2020.10.16\test\BAutest_TTR_output_iz.dat
#Control Data: C:\Users\takek\OneDrive - University of Massachusetts\1. Experiments\analyze\for Tn-seq\2020.10.16\wig\DMSO1.wig,C:\Users\takek\OneDrive - University of Massachusetts\1. Experiments\analyze\for Tn-seq\2020.10.16\wig\DMSO2.wig,C:\Users\takek\OneDrive - University of Massachusetts\1. Experiments\analyze\for Tn-seq\2020.10.16\wig\DMSO3.wig
#Experimental Data: C:\Users\takek\OneDrive - University of Massachusetts\1. Experiments\analyze\for Tn-seq\2020.10.16\wig\BA1.wig,C:\Users\takek\OneDrive - University of Massachusetts\1. Experiments\analyze\for Tn-seq\2020.10.16\wig\BA2.wig,C:\Users\takek\OneDrive - University of Massachusetts\1. Experiments\analyze\for Tn-seq\2020.10.16\wig\BA3.wig
#Annotation path: C:\Users\takek\python\Scripts\pytransit\genomes\mc2_155_tamu.prot_table
#Time: 14.8900001049
#Orf	Name	Desc	Sites	Mean Ctrl	Mean Exp	log2FC	U-Statistic	p-value	Adj. p-value
MSMEG_0001	dnaN	DNA polymerase III subunit beta	8	0	0	0	0	1	1
MSMEG_0002	-	6-phosphogluconate dehydrogenase-like protein	10	54.4	61.6	0.18	448.5	0.97735	1
MSMEG_0003	recF	recombination protein F	11	10.5	9	-0.21	546	0.97948	1
MSMEG_0004	-	hypothetical protein MSMEG_0004	3	0	0	0	0	1	1
MSMEG_0005	gyrB	DNA gyrase subunit B	22	1.2	1.2	0.02	2121.5	0.6093	1
MSMEG_0006	gyrA	DNA gyrase subunit A	33	0	0	0	0	1	1
MSMEG_0007	-	hypothetical protein MSMEG_0007	6	31.1	9.7	-1.68	188	0.37541	1
MSMEG_0009	-	hypothetical protein MSMEG_0009	0	0	0	0	0	1	1
MSMEG_0011	-	FAD-binding 9, siderophore-interacting	11	136.3	139.6	0.03	560	0.83067	1
MSMEG_0012	-	ferric enterobactin transport system permease protein FepD	9	44.4	70.7	0.67	372	0.83565	1
MSMEG_0014c	FxbA	Formyl transferase	13	333.4	328.2	-0.02	751	0.91562	1
MSMEG_0015	-	ferric enterobactin transport ATP-binding protein FepC	6	57.6	35.9	-0.68	162.5	1	1
MSMEG_0016	-	hypothetical protein MSMEG_0016	1	0	0	0	0	1	1
MSMEG_0017	-	ABC transporter, permease/ATP-binding protein	19	85.9	80.4	-0.1	1627	0.98687	1
MSMEG_0018	-	ABC transporter, permease/ATP-binding protein	11	132.2	120.9	-0.13	544	1	1
MSMEG_0019	-	amino acid adenylation	202	258.4	253.4	-0.03	182061	0.76054	1
MSMEG_0020c	-	periplasmic binding protein	10	102.5	117.4	0.2	448.5	0.98409	1
MSMEG_0021	panD	aspartate 1-decarboxylase	5	251.1	289.9	0.21	104	0.73163	1
MSMEG_0022	-	L-ornithine 5-monooxygenase	18	255.6	248.6	-0.04	1452	0.96971	1
MSMEG_0023c	-	hypothetical protein MSMEG_0023	4	158.9	140.1	-0.18	73	0.97538	1
MSMEG_0024	-	peptidyl-prolyl cis-trans isomerase B	6	177.2	144.7	-0.29	185	0.46818	1
MSMEG_0025c	-	hypothetical protein MSMEG_0025	5	91.4	64.9	-0.49	117.5	0.83306	1
MSMEG_0026c	-	putative septation inhibitor protein	2	0	0	0	0	1	1
MSMEG_0027	-	hypothetical protein MSMEG_0027	8	513	443.2	-0.21	289.5	0.9831	1
MSMEG_0028c	-	serine-threonine protein kinase	14	0	0	0	0	1	1
MSMEG_0029	-	para-aminobenzoate synthase component II	5	0	0	0	0	1	1
MSMEG_0030c	pknA	serine/threonine protein kinase PknA	12	1.2	2.6	1.11	612.5	0.32074	1
MSMEG_0031c	-	penicillin binding protein transpeptidase domain-containing protein	20	230.7	238.3	0.05	1722	0.68156	1
MSMEG_0032c	-	cell cycle protein, FtsW/RodA/SpoVE family protein	17	64.9	72.3	0.16	1286.5	0.90328	1
MSMEG_0033c	-	protein phosphatase 2C	10	45	44.6	-0.01	468.5	0.75108	1
MSMEG_0034c	-	FHA domain-containing protein	10	145.4	200.3	0.46	372	0.24883	1
MSMEG_0035c	-	FHA domain-containing protein	48	10.9	9.8	-0.15	10105	0.49598	1
MSMEG_0036c	-	hypothetical protein MSMEG_0036	1	0	0	0	0	1	1
MSMEG_0039c	-	small membrane hydrophobic protein	4	300.2	356.7	0.25	62.5	0.60055	1
MSMEG_0040c	-	hypothetical protein MSMEG_0040	4	124.2	104.3	-0.25	73.5	0.9395	1
MSMEG_0041c	-	hypothetical protein MSMEG_0041	5	332.3	309.9	-0.1	115.5	0.90678	1
MSMEG_0042	-	TetR-family protein transcriptional regulator	6	3.1	14.8	2.28	157	0.84491	1
MSMEG_0043c	-	extradiol ring-cleavage dioxygenase, class III enzyme, subunit B	13	82.7	92.5	0.16	757.5	0.97678	1
MSMEG_0044	-	hypothetical protein MSMEG_0044	19	64.6	64.2	-0.01	1658	0.83312	1
MSMEG_0045	-	hypothetical protein MSMEG_0045	15	829.4	842	0.02	1056	0.72059	1
MSMEG_0046	-	hypothetical protein MSMEG_0046	14	156.6	147.9	-0.08	894	0.914	1
MSMEG_0047c	-	hypothetical protein MSMEG_0047	4	255.2	196	-0.38	84	0.47799	1
MSMEG_0048	-	pyridoxamine 5'-phosphate oxidase family protein	10	184.9	179.8	-0.04	431	0.77644	1
MSMEG_0049c	-	pirin domain-containing protein	9	170.4	187.6	0.14	358.5	0.91675	1
MSMEG_0050	-	hypothetical protein MSMEG_0050	3	35	32.9	-0.09	41	1	1
MSMEG_0051c	-	transcription factor WhiB family protein	1	86.6	102.6	0.25	3	0.66252	1
MSMEG_0052	-	hypothetical protein MSMEG_0052	3	0	0	0	0	1	1
MSMEG_0053c	-	hypothetical protein MSMEG_0053	11	266.7	250	-0.09	547.5	0.97313	1
MSMEG_0054	-	ISMsm2, transposase	9	356.5	325	-0.13	368.5	0.95129	1
MSMEG_0055	-	hypothetical protein MSMEG_0055	11	431.2	433.7	0.01	564	0.80725	1
MSMEG_0056	-	hypothetical protein MSMEG_0056	3	439.2	446.9	0.03	42	0.91623	1
MSMEG_0057	-	hypothetical protein MSMEG_0057	6	74.3	84.8	0.19	161	0.9869	1
MSMEG_0058	-	hypothetical protein MSMEG_0058	5	297.4	231.8	-0.36	117.5	0.83309	1
MSMEG_0059	-	ATPase, AAA family protein	21	86.8	86	-0.01	1963	0.9035	1
MSMEG_0060	-	hypothetical protein MSMEG_0060	17	204.4	206.6	0.02	1296	0.97744	1
MSMEG_0061	-	ftsk/SpoIIIE family protein	23	171.5	188.3	0.13	2390.5	0.9654	1
MSMEG_0062	-	ftsk/SpoIIIE family protein	16	235.2	224.1	-0.07	1109	0.74714	1
MSMEG_0063	-	PE family protein	2	691.8	652.8	-0.08	19.5	0.86428	1
MSMEG_0064	-	PPE family protein	6	172	188.2	0.13	151.5	0.73523	1
MSMEG_0065	-	hypothetical protein MSMEG_0065	2	406.5	411.5	0.02	20	0.81018	1
MSMEG_0066	-	early secretory antigenic target, 6 kDa	3	126.1	152.9	0.28	40	1	1
MSMEG_0067	-	hypothetical protein MSMEG_0067	12	140.3	164.7	0.23	634	0.87804	1
MSMEG_0068	-	transmembrane protein	9	146.7	182.6	0.32	358	0.90153	1
MSMEG_0069	-	translation initiation factor IF-2 protein	11	371.1	399.1	0.1	536	0.91694	1
MSMEG_0070	-	hypothetical protein MSMEG_0070	6	95.5	64.1	-0.58	154	0.80194	1
MSMEG_0071	-	hypothetical protein MSMEG_0071	46	119.6	128.2	0.1	9557	0.95354	1
MSMEG_0074	-	IS1549, transposase	16	592.3	576.3	-0.04	1165	0.92688	1
MSMEG_0075	-	hypothetical protein MSMEG_0075	7	127	164.2	0.37	221	1	1
MSMEG_0076	-	antigen MTB48	14	228.8	227.1	-0.01	892.5	0.92764	1
MSMEG_0077c	-	hypothetical protein MSMEG_0077	5	40.8	27.5	-0.57	124.5	0.60457	1
MSMEG_0078c	-	hypothetical protein MSMEG_0078	6	534.6	552.7	0.05	171	0.75449	1
MSMEG_0079c	-	hypothetical protein MSMEG_0079	9	406.1	430.8	0.09	375.5	0.8521	1
MSMEG_0080c	-	hypothetical protein MSMEG_0080	9	80.7	75.3	-0.1	366	0.98355	1
MSMEG_0081c	-	hypothetical protein MSMEG_0081	2	0	0	0	0	1	1
MSMEG_0082c	-	hypothetical protein MSMEG_0082	15	144.6	156.5	0.11	1003	0.93101	1
MSMEG_0083c	-	membrane-anchored mycosin mycp1	13	265.3	267	0.01	748	0.90385	1
MSMEG_0084c	-	phosphocarrier protein HPr	2	69	53.1	-0.38	17.5	1	1
MSMEG_0085c	-	PTS system, Fru family protein, IIABC components	13	384.1	410.5	0.1	758	0.98179	1
MSMEG_0086c	-	1-phosphofructokinase	5	85.7	89.6	0.06	113.5	0.98132	1
MSMEG_0087c	-	glucitol operon repressor	4	60.4	91.6	0.6	69.5	0.90735	1
MSMEG_0088	ptsI	phosphoenolpyruvate-protein phosphotransferase	10	360.5	378.4	0.07	443	0.92088	1
MSMEG_0089	-	chromosome condensation protein	8	395.3	342.5	-0.21	307.5	0.69295	1
MSMEG_0090c	-	hypothetical protein MSMEG_0090	17	360.4	361.6	0	1301.5	0.99641	1
MSMEG_0091c	-	putative transcriptional regulator	14	495.1	546.9	0.14	892	0.93157	1
MSMEG_0092	-	transcriptional regulatory protein	13	127.2	131.2	0.04	748	0.89387	1
MSMEG_0093	-	methyltransferase	13	157.4	232.5	0.56	652	0.27243	1
MSMEG_0094c	-	hypothetical protein MSMEG_0094	2	2719.5	2931	0.11	17.5	1	1
MSMEG_0095	-	methyltransferase	12	422.9	388.4	-0.12	662	0.87804	1
MSMEG_0096	-	peroxisomal hydratase-dehydrogenase-epimerase	10	441.8	394.6	-0.16	466.5	0.81183	1
MSMEG_0097	-	oxidoreductase, zinc-binding dehydrogenase family protein	8	102.4	80.9	-0.34	289	0.99038	1
MSMEG_0098	-	methyltransferase	4	173.1	237	0.45	64	0.6186	1
MSMEG_0099	-	hypothetical protein MSMEG_0099	4	411.4	361.3	-0.19	80.5	0.64162	1
MSMEG_0100c	-	phosphotyrosine protein phosphatase ptpb	5	258.7	304.4	0.24	102	0.67827	1
MSMEG_0101	-	hypothetical protein MSMEG_0101	4	182.6	216.1	0.24	63.5	0.64162	1
MSMEG_0102c	-	putative acyl-CoA dehydrogenase	6	493.8	513.9	0.06	152.5	0.77533	1
MSMEG_0103c	-	major facilitator family protein transporter	11	331.8	378.9	0.19	566	0.78706	1
MSMEG_0104c	-	transcriptional regulator, LysR family protein	7	41.7	50.6	0.28	218.5	0.96226	1
MSMEG_0105	-	DNA-binding response regulator, LuxR family protein	4	23.8	38	0.68	71.5	1	1
MSMEG_0106	-	sensory histidine kinase	11	712.9	689.2	-0.05	550	0.94415	1
MSMEG_0107c	-	cell envelope-related function transcriptional attenuator	21	2492.4	3392.1	0.44	1760.5	0.2559	1
MSMEG_0108c	-	acyl-CoA dehydrogenase	15	150.4	183.8	0.29	971	0.73495	1
MSMEG_0109c	pntB	NAD(P) transhydrogenase, beta subunit	12	887.1	826.9	-0.1	656.5	0.92547	1
MSMEG_0110c	pntA	NAD(P) transhydrogenase subunit alpha	15	1411.1	1343.3	-0.07	1020	0.95452	1
MSMEG_0111c	-	putative magnesium transport protein	12	535.7	527.3	-0.02	630	0.84375	1
MSMEG_0112c	-	hypothetical protein MSMEG_0112	2	0	0	0	0	1	1
MSMEG_0113	-	taurine transport system permease protein TauC	9	326.7	317.3	-0.04	363.5	0.99052	1
MSMEG_0114	-	extracellular solute-binding protein, family protein 3	7	306.7	273.6	-0.16	220.5	0.98954	1
MSMEG_0115c	dehII	haloacid dehalogenase, type II	8	1.5	0	-1.34	300	0.33789	1
MSMEG_0116	-	taurine import ATP-binding protein TauB	3	397.8	495	0.32	31.5	0.45268	1
MSMEG_0117c	-	hydrolase	13	341.6	429.6	0.33	737	0.81644	1
MSMEG_0118	-	hypothetical protein MSMEG_0118	3	379.5	384.5	0.02	42.5	0.89268	1
MSMEG_0119c	-	hypothetical protein MSMEG_0119	3	187.3	207.8	0.15	36	0.72393	1
MSMEG_0120	-	transcriptional regulatory protein	14	363.9	353.7	-0.04	901	0.8683	1
MSMEG_0121	-	rhamnolipids biosynthesis 3-oxoacyl-	6	706.2	757.4	0.1	156.5	0.86573	1
MSMEG_0122	-	putative periplasmic solute-binding protein	14	330.3	369.1	0.16	843	0.72504	1
MSMEG_0123	-	hypothetical protein MSMEG_0123	4	282.1	327	0.21	71	0.97539	1
MSMEG_0124c	-	transcriptional regulator, GntR family protein	5	49.2	16.6	-1.57	117	0.81233	1
MSMEG_0125	-	integral membrane protein	16	205.5	252.9	0.3	1128	0.84845	1
MSMEG_0126c	-	mandelate racemase/muconate lactonizing enzyme	10	41.8	46	0.14	458	0.90143	1
MSMEG_0127c	-	oxidoreductase, zinc-binding dehydrogenase family protein	3	177.1	191.7	0.11	40.5	0.96413	1
MSMEG_0128	-	thioesterase superfamily protein	5	504.7	524.1	0.05	115.5	0.91709	1
MSMEG_0129	-	cyclase/dehydrase family protein	4	0	0	0	0	1	1
MSMEG_0130c	-	transcriptional regulator, GntR family protein	3	233.6	204.9	-0.19	41.5	0.96413	1
MSMEG_0131	-	acyl-CoA synthetase	12	336	359.3	0.1	648	0.99541	1
MSMEG_0132	-	hypothetical protein MSMEG_0132	7	510	455.5	-0.16	227.5	0.86475	1
MSMEG_0133	-	ABC-transporter integral membrane protein	11	388.6	342.1	-0.18	568	0.76529	1
MSMEG_0134	-	virulence factor Mce family protein	15	225.5	231.8	0.04	987	0.8321	1
MSMEG_0135	-	virulence factor Mce family protein	8	40.1	41.4	0.05	298	0.82443	1
MSMEG_0136	-	virulence factor Mce family protein, putative	12	84.1	83.3	-0.01	672	0.75822	1
MSMEG_0137	-	virulence factor mce family protein	14	40	40.4	0.02	865	0.85871	1
MSMEG_0138	-	virulence factor Mce family protein	7	32.1	25.8	-0.31	224.5	0.91207	1
MSMEG_0139	-	mce-family protein mce1f	20	377.9	354.5	-0.09	1866	0.72714	1
MSMEG_0140	-	mce associated membrane protein	8	217	233	0.1	287	0.99121	1
MSMEG_0141	-	mce associated transmembrane protein	7	136.7	134.4	-0.03	224	0.93332	1
MSMEG_0142	-	hypothetical protein MSMEG_0142	4	65.3	67.4	0.05	73	0.97539	1
MSMEG_0143	-	mce associated membrane protein	9	6.9	7.5	0.12	365	1	1
MSMEG_0144c	-	HNH endonuclease	17	2705.9	2688	-0.01	1321.5	0.87235	1
MSMEG_0145	-	hypothetical protein MSMEG_0145	3	328.5	261.3	-0.33	43	0.83339	1
MSMEG_0146c	-	mosc domain-containing protein	8	150.1	161.1	0.1	267	0.59859	1
MSMEG_0147c	-	C-5 sterol desaturase	19	134.5	132	-0.03	1618.5	0.9723	1
MSMEG_0148c	-	transcriptional regulator, TetR family protein	4	101.6	97.5	-0.06	73	0.97256	1
MSMEG_0149c	-	thiamine biosynthesis protein ThiC	14	248	226.9	-0.13	892	0.92493	1
MSMEG_0150c	-	NAD(P) transhydrogenase beta subunit	12	58.4	65.3	0.16	660	0.8619	1
MSMEG_0151c	-	PntAB protein	1	438.9	435.2	-0.01	5	1	1
MSMEG_0152c	-	alanine dehydrogenase/pyridine nucleotide transhydrogenase	10	0	0	0	0	1	1
MSMEG_0153	panE	2-dehydropantoate 2-reductase	9	117.7	130.8	0.15	362	0.94944	1
MSMEG_0154	pyk	pyruvate kinase	7	62.1	77.8	0.32	213.5	0.83752	1
MSMEG_0155c	-	transcriptional regulator	2	0	0	0	0	1	1
MSMEG_0156	-	transcriptional regulator, LysR family protein	8	193.9	178.9	-0.12	293.5	0.89784	1
MSMEG_0157	-	putative oxalyl-CoA decarboxylase	17	64.4	51.6	-0.32	1296.5	0.97846	1
MSMEG_0158	-	formyl-coenzyme A transferase	17	144.6	160	0.15	1271	0.83863	1
MSMEG_0159	-	formate dehydrogenase, gamma subunit	3	158.5	120.5	-0.4	44.5	0.75292	1
MSMEG_0160	-	formate dehydrogenase, beta subunit	14	111.7	95.4	-0.23	914	0.75936	1
MSMEG_0161	-	formate dehydrogenase, alpha subunit	25	84.4	103.5	0.29	2743	0.76141	1
MSMEG_0162	-	NAD-dependent formate dehydrogenase delta subunit	3	0	0	0	0	1	1
MSMEG_0163c	-	hypothetical protein MSMEG_0163	4	4.3	5.1	0.24	72	0.96454	1
MSMEG_0164c	-	transmembrane transport protein	19	131.9	133.4	0.02	1649.5	0.87836	1
MSMEG_0165	fdhD	formate dehydrogenase accessory protein	6	2286.2	2241.8	-0.03	156.5	0.87402	1
MSMEG_0166c	-	GntR-family protein transcriptional regulator	11	120.9	130	0.11	511	0.67141	1
MSMEG_0167c	-	transmembrane transport protein	21	401.2	406.9	0.02	1978	0.97637	1
MSMEG_0168	-	formyl-coenzyme A transferase	11	389.8	356.8	-0.13	591	0.55455	1
MSMEG_0169c	-	hypothetical protein MSMEG_0169	0	0	0	0	0	1	1
MSMEG_0170	-	transmembrane transport protein	25	128.7	122.2	-0.07	2865.5	0.82795	1
MSMEG_0171	-	histone deacetylase superfamily protein	8	147.6	122.5	-0.27	301.5	0.78301	1
MSMEG_0172c	-	transmembrane protein, putative	10	51.6	45.8	-0.17	465	0.778	1
MSMEG_0173c	-	hypothetical protein MSMEG_0173	2	7.4	8.1	0.13	13.5	0.44598	1
MSMEG_0174c	-	putative inner membrane protein	3	522.9	586.3	0.17	39.5	0.96413	1
MSMEG_0175	-	FAD dependent oxidoreductase, putative	6	181	169.5	-0.09	166.5	0.8924	1
MSMEG_0176	-	glutamine ABC transporter periplasmic-binding protein	7	225.7	208.1	-0.12	223	0.95552	1
MSMEG_0177	-	ABC polar amino acid family protein transporter, inner membrane subunit	13	48.5	44.6	-0.12	764	0.9676	1
MSMEG_0178	-	ATP-binding protein	6	29.2	35.4	0.28	159.5	0.92236	1
MSMEG_0179c	-	transcriptional regulator, GntR family protein	3	0	0	0	0	1	1
MSMEG_0180c	-	putative HTH-type transcriptional regulator	4	29.8	12.5	-1.26	75.5	0.81989	1
MSMEG_0181	-	alpha-ketoglutarate-dependent taurine dioxygenase	13	149.7	160.1	0.1	773	0.89799	1
MSMEG_0182	-	epoxide hydrolase 1	19	216	210.6	-0.04	1626	0.99477	1
MSMEG_0183c	-	hypothetical protein MSMEG_0183	5	50.8	56.9	0.16	112	1	1
MSMEG_0184	-	transferase	16	32.7	30.1	-0.12	1133	0.84551	1
MSMEG_0185c	-	MmpL6 protein	34	204.5	213.9	0.07	5120	0.83661	1
MSMEG_0186c	-	MmpS2 protein	3	1087.2	1027.4	-0.08	41	1	1
MSMEG_0187c	-	acetyltransferase	10	271.8	233.6	-0.22	471	0.75409	1
MSMEG_0188	-	MarR-family protein transcriptional regulator	0	0	0	0	0	1	1
MSMEG_0189c	anmK	anhydro-N-acetylmuramic acid kinase	13	127.5	123	-0.05	754	0.94682	1
MSMEG_0190c	-	integral membrane transport protein	23	396.3	393.8	-0.01	2387	0.97943	1
MSMEG_0191c	-	BadF/BadG/BcrA/BcrD ATPase family protein	2	59.7	35.8	-0.74	21.5	0.6081	1
MSMEG_0192	-	transcriptional regulator, RpiR family protein	7	147.3	129.5	-0.19	229	0.83813	1
MSMEG_0193	murQ	N-acetylmuramic acid-6-phosphate etherase	6	322.9	296.8	-0.12	158	0.91016	1
MSMEG_0194c	-	serine esterase, cutinase family protein	8	146.3	148.2	0.02	287	0.98918	1
MSMEG_0195	-	steroid monooxygenase	25	1252	1231.3	-0.02	2797	0.95233	1
MSMEG_0196	-	putative dehydrogenase	14	112	107.8	-0.05	868	0.88901	1
MSMEG_0197c	-	nudix hydrolase	6	66.7	49.6	-0.43	166.5	0.89237	1
MSMEG_0198c	-	acyl-CoA dehydrogenase domain-containing protein	8	209.1	248.1	0.25	286	0.96756	1
MSMEG_0200	-	hypothetical protein MSMEG_0200	23	99.7	101.9	0.03	2372	0.96548	1
MSMEG_0201c	-	hypothetical protein MSMEG_0201	6	368.4	368.8	0	167	0.88516	1
MSMEG_0202	-	IS1096, tnpA protein	9	1780.4	1888.1	0.08	378	0.82166	1
MSMEG_0203c	-	IS1096, tnpR protein	10	755.1	592.9	-0.35	468.5	0.7899	1
MSMEG_0204	-	hypothetical protein MSMEG_0204	12	108.6	99	-0.13	675	0.72851	1
MSMEG_0205c	-	tetracenomycin polyketide synthesis hydroxylase TcmH	4	148.2	161	0.12	66	0.74785	1
MSMEG_0206c	-	acyltransferase 3	20	211.5	228.6	0.11	1785	0.93743	1
MSMEG_0207	-	MarR-family protein transcriptional regulator	3	51.4	57.1	0.15	39	0.91623	1
MSMEG_0208	-	ribonuclease	7	17.8	24.4	0.45	222	0.97741	1
MSMEG_0209	-	ribonuclease inhibitor	3	60.2	54.3	-0.15	41	1	1
MSMEG_0210c	-	LprO protein	19	138.9	160.8	0.21	1579	0.78071	1
MSMEG_0211c	-	ABC transporter, ATP-binding protein	19	322.6	325.6	0.01	1648.5	0.89132	1
MSMEG_0212c	-	lyase	4	97.7	121.9	0.32	68	0.82903	1
MSMEG_0213c	-	transcriptional regulator	9	244	200.2	-0.29	384	0.73075	1
MSMEG_0214c	-	L-sorbosone dehydrogenase	12	158.2	135.6	-0.22	687.5	0.6424	1
MSMEG_0215c	-	YhhW family protein	8	278.5	271.1	-0.04	290.5	0.9662	1
MSMEG_0216	-	3-hydroxyacyl-CoA dehydrogenase	10	279.6	305.4	0.13	447	0.97028	1
MSMEG_0217c	-	alcohol dehydrogenase B	11	344.4	328.3	-0.07	553.5	0.91231	1
MSMEG_0218	-	3-demethylubiquinone-9 3-methyltransferase	6	284.4	276.5	-0.04	162.5	1	1
MSMEG_0219c	-	RNA polymerase factor sigma-70	12	430.1	413.8	-0.06	661	0.88731	1
MSMEG_0220	-	monoglyceride lipase	12	106.5	132.9	0.32	620.5	0.73413	1
MSMEG_0221	-	secreted protein	8	80.6	77.9	-0.05	291	0.95643	1
MSMEG_0222	-	hypothetical protein MSMEG_0222	8	311.2	311.2	0	266	0.6249	1
MSMEG_0223	-	hypothetical protein MSMEG_0223	5	0	0	0	0	1	1
MSMEG_0224	-	O-methyltransferase MdmC	5	224.1	248.9	0.15	100.5	0.63015	1
MSMEG_0225c	-	MmpL4 protein	30	448.3	450.9	0.01	4015	0.91988	1
MSMEG_0226c	-	MmpS5 protein	4	758.1	787.5	0.05	64	0.66501	1
MSMEG_0227	-	transcriptional regulator, TetR family protein	4	129.5	99.4	-0.38	74.5	0.87935	1
MSMEG_0228	-	adenylate and guanylate cyclase catalytic domain-containing protein	31	109.9	111.4	0.02	4327	0.99492	1
MSMEG_0229c	ilvD	dihydroxy-acid dehydratase	9	178.4	186.7	0.07	365	1	1
MSMEG_0230	-	hypothetical protein MSMEG_0230	5	377.6	374.3	-0.01	114.5	0.944	1
MSMEG_0231c	-	hypothetical protein MSMEG_0231	2	148.8	140.6	-0.08	18	0.93619	1
MSMEG_0232	-	sugar transporter family protein	8	208.4	195.6	-0.09	291.5	0.94328	1
MSMEG_0233	-	lipoprotein Lpps	10	1523.8	1581.1	0.05	422	0.68424	1
MSMEG_0234c	-	metallopeptidase	25	329.2	356	0.11	2768	0.86729	1
MSMEG_0235	-	hypothetical protein MSMEG_0235	4	146.2	173	0.24	69	0.87742	1
MSMEG_0236	-	putative transmembrane protein	4	127.8	104.2	-0.29	80.5	0.64155	1
MSMEG_0237	-	ISMsm3, transposase	9	159.7	166.8	0.06	349	0.79307	1
MSMEG_0238c	-	O-acetylhomoserine/O-acetylserine sulfhydrylase	6	394.1	436.6	0.15	146	0.61326	1
MSMEG_0239c	-	O-acetylhomoserine/O-acetylserine sulfhydrylase	12	240.2	222.7	-0.11	651	0.97677	1
MSMEG_0240c	-	hypothetical protein MSMEG_0240	5	156.3	95.7	-0.71	114.5	0.944	1
MSMEG_0241c	-	MmpL11 protein	17	318.5	336	0.08	1329	0.85061	1
MSMEG_0242	-	hypothetical protein MSMEG_0242	2	1244.1	1391.3	0.16	19	0.93619	1
MSMEG_0243	-	hypothetical protein MSMEG_0243	4	46	67.1	0.54	63	0.59272	1
MSMEG_0244	-	two component response transcriptional regulatory protein prra	5	242.4	216	-0.17	116.5	0.88413	1
MSMEG_0245c	-	transmembrane protein	2	343.3	328.3	-0.06	20.5	0.73246	1
MSMEG_0246	-	sensor-type histidine kinase PrrB	3	2.3	2	-0.22	41	1	1
MSMEG_0247c	-	secreted peptidase	15	192.4	179.5	-0.1	1012	1	1
MSMEG_0248c	-	hypothetical protein MSMEG_0248	10	166.3	166.9	0.01	453	0.96671	1
MSMEG_0249	-	integral membrane protein	8	18.4	11.4	-0.69	307	0.6044	1
MSMEG_0250c	MmpL3	membrane protein, MmpL family protein	21	0	0	0	0	1	1
MSMEG_0251c	-	hypothetical protein MSMEG_0251	10	185.8	144.8	-0.36	449	0.99334	1
MSMEG_0252c	trmB	tRNA (guanine-N(7))-methyltransferase	6	63	73.8	0.23	146	0.6188	1
MSMEG_0253	-	hypothetical protein MSMEG_0253	3	16.7	24.4	0.55	38	0.83339	1
MSMEG_0254	-	hypothetical protein MSMEG_0254	10	279.8	282.1	0.01	458	0.89916	1
MSMEG_0255	pckA	phosphoenolpyruvate carboxykinase	15	539	597.8	0.15	961.5	0.68327	1
MSMEG_0256	-	hypothetical protein MSMEG_0256	9	185.2	184.8	0	372	0.89911	1
MSMEG_0257	-	acyl-CoA synthetase	20	147.7	146.3	-0.01	1762	0.83147	1
MSMEG_0258c	-	oxidoreductase, short chain dehydrogenase/reductase family protein	5	0	0	0	0	1	1
MSMEG_0259	-	enoyl-CoA hydratase/isomerase	4	129.1	166.8	0.37	70.5	0.9486	1
MSMEG_0260	-	DNA-binding protein	8	571.7	528.7	-0.11	306	0.71609	1
MSMEG_0261	-	p40 protein	8	148.8	148.5	0	285.5	0.96217	1
MSMEG_0262	-	hypothetical protein MSMEG_0262	5	0	0	0	0	1	1
MSMEG_0263	-	amidohydrolase 3	13	75.9	71.4	-0.09	763	0.9784	1
MSMEG_0264	-	transmembrane transport protein	7	13.5	11.5	-0.23	222.5	0.96225	1
MSMEG_0265c	-	uracil DNA glycosylase superfamily protein	4	131.7	116.8	-0.17	77	0.79253	1
MSMEG_0266	-	arginine decarboxylase	15	79.3	59.6	-0.41	999	0.89113	1
MSMEG_0267	-	esterase	12	41.5	40.3	-0.04	624	0.73285	1
MSMEG_0268c	-	transcriptional regulator, GntR family protein	12	159.4	172.5	0.11	645.5	0.9791	1
MSMEG_0269c	-	short chain dehydrogenase	8	383.3	410.4	0.1	297.5	0.83099	1
MSMEG_0270c	-	aminoglycoside phosphotransferase	10	125.7	123.3	-0.03	423	0.54614	1
MSMEG_0271c	-	hypothetical protein MSMEG_0271	12	51.5	49.5	-0.06	640	0.90967	1
MSMEG_0272c	-	propanediol utilization protein PduA	1	482.4	500.6	0.05	5	1	1
MSMEG_0273c	-	ethanolamine utilization protein EutN	1	0	0	0	0	1	1
MSMEG_0274c	-	hypothetical protein MSMEG_0274	2	0	0	0	0	1	1
MSMEG_0275c	-	microcompartments protein family protein	8	430.2	462.9	0.11	282	0.88145	1
MSMEG_0276c	-	aldehyde-alcohol dehydrogenase	13	101.6	103	0.02	778	0.84137	1
MSMEG_0277c	-	putative aminotransferase	13	97.6	116.1	0.25	735	0.77544	1
MSMEG_0278c	-	hypothetical protein MSMEG_0278	1	0	0	0	0	1	1
MSMEG_0279	-	amino acid permease	24	16.1	13.4	-0.26	2564	0.82507	1
MSMEG_0280c	-	alpha/beta hydrolase fold	9	128	122.4	-0.06	376	0.82349	1
MSMEG_0281	-	choline dehydrogenase	20	165	160.2	-0.04	1804	0.98345	1
MSMEG_0282	-	hypothetical protein MSMEG_0282	7	54.9	70.1	0.35	220.5	0.98741	1
MSMEG_0283	-	short chain dehydrogenase	5	39.9	74.7	0.91	108	0.81233	1
MSMEG_0284c	-	ribosyldihydronicotinamide dehydrogenase (quinone)	13	61.2	71	0.21	755	0.94603	1
MSMEG_0285c	-	transcriptional regulator TetR family protein	5	34.7	33.6	-0.05	100.5	0.56973	1
MSMEG_0286c	-	GntR-family protein transcriptional regulator	6	58.9	69.9	0.25	160	0.95489	1
MSMEG_0287c	-	hypothetical protein MSMEG_0287	4	0	0	0	0	1	1
MSMEG_0288	-	FAD dependent oxidoreductase, putative	10	98.9	92.1	-0.1	450.5	1	1
MSMEG_0289	-	alpha/beta hydrolase fold family protein	12	11.3	9.7	-0.22	604	0.46508	1
MSMEG_0290	-	acyltransferase, ws/dgat/mgat subfamily protein	12	99.7	92.5	-0.11	649	0.99308	1
MSMEG_0291c	-	dioxygenase, TauD/TfdA family protein	11	7.7	10.3	0.42	544	1	1
MSMEG_0292c	-	hypothetical protein MSMEG_0292	5	39.9	24.7	-0.69	115	0.9055	1
MSMEG_0293c	-	Rieske (2Fe-2S) domain-containing protein	20	41.7	26.9	-0.63	1787	0.92636	1
MSMEG_0294c	fabG	3-oxoacyl-(acyl-carrier-protein) reductase	6	0	0	0	0	1	1
MSMEG_0295c	-	oxidoreductase, FAD-binding	10	24.6	44.8	0.87	433	0.71774	1
MSMEG_0296c	-	transcriptional regulator, MarR family protein	1	0	0	0	0	1	1
MSMEG_0297c	-	amidohydrolase	15	10.4	6.6	-0.65	1019.5	0.92926	1
MSMEG_0298c	-	hypothetical protein MSMEG_0298	4	25.7	33.2	0.37	71.5	1	1
MSMEG_0299c	-	Rieske (2Fe-2S) domain-containing protein	22	21	27.2	0.38	2094	0.61722	1
MSMEG_0300	-	amidohydrolase family protein	16	43.8	52.2	0.26	1179	0.77042	1
MSMEG_0301c	-	oxidoreductase, FAD-binding	6	158.5	164.7	0.06	161.5	1	1
MSMEG_0302c	-	peptidase, S9A/B/C families	17	2	1.8	-0.19	1326	0.56756	1
MSMEG_0303	-	alcohol dehydrogenase, zinc-containing	6	96.8	89.8	-0.11	162	0.98496	1
MSMEG_0304c	-	acyl-CoA synthetase	11	192.1	174.5	-0.14	577	0.67303	1
MSMEG_0305c	-	acyltransferase domain-containing protein	10	236	218.8	-0.11	449	0.99334	1
MSMEG_0306	-	arylamine N-acetyltransferase	9	298.2	245	-0.28	405	0.48651	1
MSMEG_0307	-	transcriptional regulator, AraC family protein	8	4.8	5.7	0.24	287.5	1	1
MSMEG_0308	-	dihydrofolate reductase	8	292.8	280.1	-0.06	290	0.97362	1
MSMEG_0309c	-	aldehyde dehydrogenase family protein	12	225	225.2	0	651	0.97721	1
MSMEG_0311	-	glycosyltransferase	12	0	0	0	0	1	1
MSMEG_0312c	eda	2-dehydro-3-deoxyphosphogluconate aldolase/4-hydroxy-2-oxoglutarate aldolase	7	188.8	199.4	0.08	222.5	0.96864	1
MSMEG_0313c	edd	phosphogluconate dehydratase	14	157.2	139.5	-0.17	878	0.97437	1
MSMEG_0314c	zwf	glucose-6-phosphate 1-dehydrogenase	15	137.4	138.2	0.01	1004	0.94721	1
MSMEG_0315c	-	transmembrane protein	13	2.8	2.1	-0.4	761	1	1
MSMEG_0316	-	putative NagC regulator	9	47.5	51.7	0.12	363.5	0.99052	1
MSMEG_0317c	-	hypothetical protein MSMEG_0317	15	0	0	0	0	1	1
MSMEG_0318c	-	AMP-dependent synthetase and ligase	12	323.8	298.7	-0.12	652.5	0.95987	1
MSMEG_0319	-	acyltransferase	9	4.5	5.7	0.34	362	0.94944	1
MSMEG_0320c	-	putative phosphotriesterase	9	44.6	29.7	-0.59	392	0.59497	1
MSMEG_0321c	-	transcriptional regulator	19	82.3	102.1	0.31	1584	0.78139	1
MSMEG_0323c	-	acyl-CoA dehydrogenase, short-chain specific, putative	19	213.6	213.5	0	1574	0.74806	1
MSMEG_0324	-	hypothetical protein MSMEG_0324	5	95.3	110.8	0.22	112	1	1
MSMEG_0325	-	hypothetical protein MSMEG_0325	5	262.9	267.8	0.03	112.5	0.98255	1
MSMEG_0326	-	AMP-dependent synthetase and ligase	19	468.6	437.7	-0.1	1603	0.90448	1
MSMEG_0327	-	aldehyde dehydrogenase	18	142	158.2	0.16	1409	0.74206	1
MSMEG_0328	-	hypothetical protein MSMEG_0328	5	0	0	0	0	1	1
MSMEG_0329	-	FMN oxidoreductase	4	316	293.6	-0.11	74.5	0.90737	1
MSMEG_0330c	-	transcriptional regulator, LuxR family protein	9	147.2	140.2	-0.07	367	0.97092	1
MSMEG_0331c	-	transcriptional regulator, LuxR family protein	11	49.1	52.3	0.09	540	0.95627	1
MSMEG_0332	-	2-nitropropane dioxygenase, NPD	7	38.3	41.3	0.11	222	0.96703	1
MSMEG_0333	-	carboxyl transferase domain-containing protein	21	101.6	100.4	-0.02	1932	0.76054	1
MSMEG_0334	-	acetyl-/propionyl-coenzyme A carboxylase alpha chain	19	126.3	108.4	-0.22	1635.5	0.93346	1
MSMEG_0335	-	enoyl-CoA hydratase/isomerase	5	116.1	100.5	-0.21	118.5	0.79673	1
MSMEG_0336	-	hypothetical protein MSMEG_0336	2	401.1	418.2	0.06	15	0.68892	1
MSMEG_0337	-	hypothetical protein MSMEG_0337	18	94.2	99.9	0.09	1451	0.96203	1
MSMEG_0338	-	acyl-CoA dehydrogenase fadE12	16	140.2	133.5	-0.07	1129	0.86368	1
MSMEG_0339	-	FMN-dependent monooxygenase	15	70.8	66.2	-0.1	992	0.86235	1
MSMEG_0340	-	enoyl-CoA hydratase/isomerase family protein	5	21.2	20.4	-0.05	117	0.84771	1
MSMEG_0341c	-	hypothetical protein MSMEG_0341	8	115.8	132.6	0.2	275	0.72629	1
MSMEG_0342c	-	hypothetical protein MSMEG_0342	19	160.2	145.4	-0.14	1656	0.84859	1
MSMEG_0343c	-	TetR-family protein transcriptional regulator	6	85.6	113.5	0.41	149.5	0.68488	1
MSMEG_0344	-	hypothetical protein MSMEG_0344	7	41.5	42.3	0.03	211	0.81216	1
MSMEG_0345	-	hypothetical protein MSMEG_0345	15	270	279.8	0.05	949	0.57649	1
MSMEG_0346	-	virulence factor	14	78	86.1	0.14	846	0.7185	1
MSMEG_0347	-	virulence factor Mce family protein	13	241.8	238.6	-0.02	750.5	0.9152	1
MSMEG_0348	-	mce-family protein mce3c	22	33.7	47.4	0.49	2103	0.64408	1
MSMEG_0349	-	virulence factor mce family protein	8	293.5	298.8	0.03	294.5	0.89886	1
MSMEG_0350	-	virulence factor Mce family protein	6	31.9	66.3	1.05	157.5	0.84545	1
MSMEG_0351	-	virulence factor mce family protein	22	94.2	81.6	-0.21	2233.5	0.77873	1
MSMEG_0352	-	hypothetical protein MSMEG_0352	6	10.1	9.3	-0.12	162.5	1	1
MSMEG_0353	-	hypothetical protein MSMEG_0353	6	110.7	120.6	0.12	160	0.95489	1
MSMEG_0354	-	hypothetical protein MSMEG_0354	8	85.3	89.1	0.06	258	0.37173	1
MSMEG_0355	-	hypothetical protein MSMEG_0355	5	384.5	403.2	0.07	111	0.96671	1
MSMEG_0356c	-	acetyltransferase	5	183	175.8	-0.06	112.5	0.98132	1
MSMEG_0357	-	transmembrane transport protein	6	598.2	696.7	0.22	154.5	0.81944	1
MSMEG_0358	-	ribonucleotide-diphosphate reductase subunit beta	9	3558.1	3651.4	0.04	376	0.84208	1
MSMEG_0359c	-	hypothetical protein MSMEG_0359	22	0	0	0	0	1	1
MSMEG_0360c	-	hypothetical protein MSMEG_0360	2	0	0	0	0	1	1
MSMEG_0361	-	glycosyl hydrolase family protein 3	11	240.3	240.4	0	555.5	0.89178	1
MSMEG_0362c	-	amidohydrolase 2	12	165.1	194.8	0.24	611	0.65627	1
MSMEG_0363	-	TetR-family protein regulatory protein	8	63.4	88.9	0.49	243	0.35505	1
MSMEG_0364	-	hypothetical protein MSMEG_0364	1	0	0	0	0	1	1
MSMEG_0365	-	hypothetical protein MSMEG_0365	16	183.9	187.2	0.03	1074.5	0.49226	1
MSMEG_0366	-	hypothetical protein MSMEG_0366	4	39.6	38.3	-0.05	71.5	1	1
MSMEG_0367c	-	O-demethylpuromycin-O-methyltransferase	9	208.2	208.5	0	365	1	1
MSMEG_0368	-	hypothetical protein MSMEG_0368	10	311.9	337.4	0.11	482	0.62873	1
MSMEG_0369	-	hypothetical protein MSMEG_0369	7	6.1	8.8	0.52	211	0.68733	1
MSMEG_0370	-	hypothetical protein MSMEG_0370	33	45.9	44.7	-0.04	4915	0.96858	1
MSMEG_0371c	-	MaoC like domain-containing protein	7	0	0	0	0	1	1
MSMEG_0372c	fabG	3-ketoacyl-(acyl-carrier-protein) reductase	9	2.5	4.2	0.72	316	0.22034	1
MSMEG_0373	-	acetyl-CoA acetyltransferase	11	181.9	221.7	0.29	529	0.84319	1
MSMEG_0374c	-	glycolate oxidase subunit	13	3730.5	1909.1	-0.97	770.5	0.92104	1
MSMEG_0375c	-	phospholipase D family protein	18	257	279.1	0.12	1430.5	0.85383	1
MSMEG_0376	-	transcriptional regulator, AraC family protein	10	19.8	23.6	0.25	448.5	0.98183	1
MSMEG_0377	-	nitrile hydratase	16	277.6	278.4	0	1174.5	0.86432	1
MSMEG_0378	nthA	nitrile hydratase, alpha subunit	6	145.6	162.4	0.16	146.5	0.60214	1
MSMEG_0379	-	nitrile hydratase activator P14k	3	410.4	490.1	0.26	36	0.7238	1
MSMEG_0380	-	MmpS4 protein	6	75.6	72.7	-0.06	170	0.81097	1
MSMEG_0381	-	Mmp14a protein	36	78.7	88.3	0.17	5613	0.62859	1
MSMEG_0382	-	putative transport protein	40	97.3	105.8	0.12	6897	0.55517	1
MSMEG_0383c	-	hypothetical protein MSMEG_0383	5	515	562.7	0.13	109.5	0.91709	1
MSMEG_0384c	rfbA	glucose-1-phosphate thymidylyltransferase	18	0	0	0	0	1	1
MSMEG_0385	-	glycosyl transferase	22	462	479	0.05	2171.5	0.97699	1
MSMEG_0386	-	NAD dependent epimerase/dehydratase family protein	19	2.5	1.7	-0.58	1599	0.68967	1
MSMEG_0387	-	Rmt2 protein	17	484.6	479.7	-0.01	1310.5	0.9485	1
MSMEG_0388	tylF	macrocin-O-methyltransferase	8	187.6	194.6	0.05	288	0.99128	1
MSMEG_0389	-	glycosyl transferase	15	0	0	0	0	1	1
MSMEG_0390	-	putative acyltransferase	29	186.9	175.4	-0.09	3972	0.55989	1
MSMEG_0391	-	Rmt3 protein	14	489.2	443	-0.14	915	0.76196	1
MSMEG_0392c	-	glycosyl transferase	24	122.3	119.4	-0.03	2592	0.99754	1
MSMEG_0393	-	Fmt protein	25	1058.7	1055.7	0	2772.5	0.87664	1
MSMEG_0394	-	hypothetical protein MSMEG_0394	2	0	0	0	0	1	1
MSMEG_0395	-	hypothetical protein MSMEG_0395	0	0	0	0	0	1	1
MSMEG_0396c	-	hypothetical protein MSMEG_0396	6	428.6	419.6	-0.03	173	0.73701	1
MSMEG_0397	-	IS1096, tnpA protein	9	1799	1977.3	0.14	372	0.90339	1
MSMEG_0398c	-	IS1096, tnpR protein	10	712.1	565.6	-0.33	466	0.81853	1
MSMEG_0399	-	hypothetical protein MSMEG_0399	2	0	0	0	0	1	1
MSMEG_0400	-	peptide synthetase	79	619.5	597.1	-0.05	28164	0.95514	1
MSMEG_0401	-	putative non-ribosomal peptide synthase	33	190.2	182.4	-0.06	5018	0.74621	1
MSMEG_0402	-	linear gramicidin synthetase subunit D	84	365.4	356.3	-0.04	32191.5	0.76747	1
MSMEG_0403	-	integral membrane protein	10	265.5	412.3	0.63	464.5	0.83536	1
MSMEG_0404	-	sigma associated protein	5	232.6	274.1	0.24	106.5	0.81885	1
MSMEG_0405	-	extra cytoplasmic sigma factor	15	398.1	424.4	0.09	1019	0.96096	1
MSMEG_0406c	-	acyl-CoA-dehydrogenase	20	219.6	198.6	-0.15	1867	0.71706	1
MSMEG_0407	-	hypothetical protein MSMEG_0407	8	155.7	199.6	0.36	268.5	0.68421	1
MSMEG_0408c	-	type I modular polyketide synthase	86	98.7	104	0.08	33113.5	0.90686	1
MSMEG_0409	-	condensation domain-containing protein	22	94.5	86.5	-0.13	2203	0.88697	1
MSMEG_0410	-	MmpL protein	25	547.2	583.7	0.09	2754	0.82283	1
MSMEG_0411	-	acyl-CoA synthetase	17	66.9	74	0.15	1268.5	0.80499	1
MSMEG_0412	-	hypothetical protein MSMEG_0412	18	450.9	493.4	0.13	1409	0.76346	1
MSMEG_0413c	-	hypothetical protein MSMEG_0413	4	162.1	228.6	0.5	61	0.53939	1
MSMEG_0414	-	oxidoreductase, 2OG-Fe(II) oxygenase family protein	11	286.2	291	0.02	539	0.9476	1
MSMEG_0415	-	NADH-FMN oxidoreductase	1	255.2	351.3	0.46	1	0.19043	1
MSMEG_0416c	-	hypothetical protein MSMEG_0416	3	242.4	261.2	0.11	35.5	0.68567	1
MSMEG_0417c	-	fumarate reductase iron-sulfur subunit	7	96.5	130.2	0.43	187	0.39936	1
MSMEG_0418c	sdhA	succinate dehydrogenase flavoprotein subunit	20	177.3	192.3	0.12	1770.5	0.87549	1
MSMEG_0419c	-	integral membrane protein	18	159.3	155	-0.04	1474	0.91667	1
MSMEG_0420c	-	hypothetical protein MSMEG_0420	4	224.9	209.7	-0.1	73.5	0.9395	1
MSMEG_0421	-	hypothetical protein MSMEG_0421	2	0	0	0	0	1	1
MSMEG_0422	-	transferase	2	0	0	0	0	1	1
MSMEG_0423	-	hypothetical protein MSMEG_0423	4	786.1	747	-0.07	74.5	0.90737	1
MSMEG_0424c	-	Hsp20/alpha crystallin family protein	6	262.3	301.3	0.2	159	0.93577	1
MSMEG_0425c	-	putative membrane protein DcsA	8	22.6	22.2	-0.02	287.5	1	1
MSMEG_0426	-	transcriptional regulator, GntR family protein	18	162	142.6	-0.18	1453.5	0.97517	1
MSMEG_0427	nirB	nitrite reductase	28	59.3	64.1	0.11	3475	0.84349	1
MSMEG_0428	-	nitrite reductase	4	95.5	82	-0.22	72.5	1	1
MSMEG_0429c	-	putative ferric uptake regulator	5	137.9	158.9	0.2	101	0.64374	1
MSMEG_0430	-	ISMsm4, transposase	16	161.7	151.7	-0.09	1162.5	0.94068	1
MSMEG_0431c	-	secreted protein	10	164.1	181.3	0.14	435	0.82464	1
MSMEG_0432c	-	bifunctional uroporphyrinogen-III synthetase/response regulator domain-containing protein	6	46.3	49.5	0.1	164.5	0.94258	1
MSMEG_0433c	-	nitrite extrusion protein	17	352.7	310.1	-0.19	1346.5	0.75879	1
MSMEG_0434c	-	aminoglycoside 2'-N-acetyltransferase (AAC(2')-Id)	5	685.7	610	-0.17	111	0.96691	1
MSMEG_0435c	-	allophanate hydrolase subunit 2	9	100.1	110.5	0.14	354.5	0.85673	1
MSMEG_0436c	-	allophanate hydrolase subunit 1	6	64.1	64.6	0.01	157	0.87751	1
MSMEG_0437c	-	hypothetical protein MSMEG_0437	12	835.1	772.7	-0.11	676	0.75667	1
MSMEG_0438c	-	periplasmic binding protein	4	189.5	168.9	-0.17	82	0.58336	1
MSMEG_0439c	-	hypothetical protein MSMEG_0439	5	259	274.9	0.09	106	0.79704	1
MSMEG_0440c	-	hypothetical protein MSMEG_0440	0	0	0	0	0	1	1
MSMEG_0441c	-	hypothetical protein MSMEG_0441	9	153.4	130.5	-0.23	381	0.77633	1
MSMEG_0442c	-	tetracycline repressor domain-containing protein	5	357.7	384.6	0.1	105	0.76414	1
MSMEG_0443	-	hydrolase, carbon-nitrogen family protein	15	153	148.6	-0.04	1013	1	1
MSMEG_0444	-	agmatine deiminase	8	200.4	184.5	-0.12	293	0.92099	1
MSMEG_0445	-	amidohydrolase family protein	19	213.4	242.7	0.19	1595	0.86104	1
MSMEG_0446	-	putrescine importer	20	260.3	269	0.05	1796	0.98482	1
MSMEG_0447c	-	hypothetical protein MSMEG_0447	2	604.5	596.3	-0.02	18	0.93619	1
MSMEG_0448	-	transcriptional regulator, MarR family protein	7	1711.2	2173	0.34	214.5	0.8898	1
MSMEG_0449c	-	transporter, major facilitator family protein, putative	16	150.8	154	0.03	1149	0.98319	1
MSMEG_0450	-	hypothetical protein MSMEG_0450	2	71.7	74.1	0.05	17.5	1	1
MSMEG_0451c	-	oxidoreductase, FAD-linked	1	88.6	180.8	1.03	1	0.19043	1
MSMEG_0452c	-	inner membrane permease YgbN	10	79.5	73	-0.12	447.5	0.97539	1
MSMEG_0453c	aroK	shikimate kinase	6	92.7	88.7	-0.06	162	0.98707	1
MSMEG_0454	-	GntR-family protein transcriptional regulator	3	11.1	4.4	-1.32	42.5	0.85569	1
MSMEG_0455	-	aldehyde dehydrogenase	17	209.5	214.6	0.03	1296.5	0.98062	1
MSMEG_0456c	-	DNA gyrase subunit A	14	99.9	105.7	0.08	838	0.68966	1
MSMEG_0457c	-	DNA topoisomerase IV subunit B	11	279.3	302.6	0.12	540.5	0.96147	1
MSMEG_0458	-	two-component system sensor kinase	8	84.2	81.2	-0.05	287	0.98918	1
MSMEG_0459	-	two-component system response regulator	6	290.5	266.2	-0.13	167	0.88616	1
MSMEG_0460c	-	alpha/beta hydrolase fold	7	75	73.7	-0.03	220.5	0.98741	1
MSMEG_0461	-	CinZ protein	7	296.8	270.6	-0.13	217	0.93571	1
MSMEG_0462	-	MmpS4 protein	8	319.7	273.7	-0.22	298	0.83973	1
MSMEG_0463	-	MmpL4 protein	33	166.5	157.4	-0.08	4937	0.92361	1
MSMEG_0464c	-	phosphomethylpyrimidine kinase	7	417.2	354.2	-0.24	234.5	0.72351	1
MSMEG_0465	-	transcriptional regulator, TetR family protein	6	108.2	100.7	-0.1	170	0.81098	1
MSMEG_0466	-	hypothetical protein MSMEG_0466	11	260.6	257.1	-0.02	542	0.97909	1
MSMEG_0467c	-	membrane transport protein	3	62.1	108.9	0.81	40	1	1
MSMEG_0468c	-	integral membrane protein	5	198.1	247.9	0.32	114	0.96343	1
MSMEG_0469	-	transcriptional regulatory protein PadR-	12	376.1	433.8	0.21	603	0.61391	1
MSMEG_0470c	-	para-nitrobenzyl esterase	27	115.6	122.4	0.08	3246.5	0.8988	1
MSMEG_0471	-	transcriptional regulator LysR family protein	4	24.6	31.1	0.34	70.5	0.9395	1
MSMEG_0472c	-	putative lipoprotein	8	428.3	388.7	-0.14	294.5	0.89886	1
MSMEG_0473	-	transcriptional regulator, LuxR family protein	8	301.6	252.9	-0.25	285	0.95705	1
MSMEG_0474	-	glucosamine--fructose-6-phosphate aminotransferase (isomerizing)	14	59.5	61.5	0.05	932	0.62087	1
MSMEG_0475	-	nucleotide-sugar dehydrogenase	12	197.7	216.7	0.13	625	0.78767	1
MSMEG_0476	-	chitin synthase	29	117.1	126.4	0.11	3841	0.8432	1
MSMEG_0477c	-	hypothetical protein MSMEG_0477	7	129.8	115.6	-0.17	219	0.97775	1
MSMEG_0478	-	secreted protein, putative	19	181.7	185	0.03	1600	0.87891	1
MSMEG_0479	-	hypothetical protein MSMEG_0479	6	151.5	134.9	-0.17	160.5	0.97302	1
MSMEG_0480c	-	transcriptional regulator, GntR family protein	5	342.7	351.7	0.04	110.5	0.94767	1
MSMEG_0481	-	FAD dependent oxidoreductase	18	233.8	219.7	-0.09	1465.5	0.96095	1
MSMEG_0482	-	dihydroxy-acid dehydratase	15	71.3	83.8	0.23	991.5	0.85179	1
MSMEG_0483	-	shikimate transporter	23	68.3	69.2	0.02	2351	0.88897	1
MSMEG_0484c	-	formamidase	10	78.4	90.2	0.2	449	0.99156	1
MSMEG_0485c	-	amidase	21	132.5	159.2	0.26	1951	0.85762	1
MSMEG_0486c	-	putative ABC transporter, periplasmic protein	15	190.6	202.2	0.09	999	0.90149	1
MSMEG_0487c	-	ABC transporter permease	11	86.6	83.7	-0.05	518	0.68663	1
MSMEG_0488c	-	ABC transporter ATP-binding protein	14	91.7	93.6	0.03	881	0.9962	1
MSMEG_0489	-	racemase	17	418.1	431.6	0.05	1296.5	0.97878	1
MSMEG_0490	-	enoyl-CoA hydratase	9	85.5	86.3	0.01	359.5	0.91481	1
MSMEG_0491c	-	transcriptional regulator, LacI family protein	19	31.1	32.7	0.07	1660.5	0.79507	1
MSMEG_0492c	-	hypothetical protein MSMEG_0492	7	178.8	122.2	-0.55	231	0.78033	1
MSMEG_0493c	-	hypothetical protein MSMEG_0493	0	0	0	0	0	1	1
MSMEG_0494c	-	hypothetical protein MSMEG_0494	1	0	0	0	0	1	1
MSMEG_0496c	-	coenzyme B12-dependent glycerol dehydrogenase small subunit	2	13.8	14.9	0.11	18	0.9241	1
MSMEG_0497c	-	glycerol dehydratase large subunit	19	58.5	67.9	0.21	1624	1	1
MSMEG_0498c	-	hypothetical protein MSMEG_0498	0	0	0	0	0	1	1
MSMEG_0499	-	amino acid permease-associated region	17	330	379.9	0.2	1264	0.79906	1
MSMEG_0500	-	regulator of polyketide synthase expression, putative	7	108.6	127.3	0.23	214	0.86711	1
MSMEG_0501c	-	glucosamine-6-phosphate deaminase 1	6	0.4	3.8	3.21	152	0.53071	1
MSMEG_0502c	-	glucosidase	16	72.6	81.8	0.17	1099	0.66065	1
MSMEG_0503c	-	DeoR-family protein transcriptional regulator	5	95	94	-0.02	107	0.7797	1
MSMEG_0504	-	carbohydrate kinase	9	98.3	108.3	0.14	350.5	0.79751	1
MSMEG_0505	-	sugar ABC transporter, substrate-binding protein, putative	19	14.8	21.2	0.52	1606.5	0.88107	1
MSMEG_0506	-	ABC transporter, permease protein	11	6094.9	6178.4	0.02	546.5	0.98219	1
MSMEG_0507	-	sugar ABC transporter, permease protein	7	121.2	109.8	-0.14	227	0.87183	1
MSMEG_0508	-	glycerol-phosphate porter	12	48.4	79.1	0.71	623	0.74537	1
MSMEG_0509c	-	transcriptional regulatory protein	1	180.9	171.5	-0.08	5	1	1
MSMEG_0510	-	D-tagatose-bisphosphate aldolase, class II, non-catalytic subunit	22	118.3	109.1	-0.12	2203.5	0.89838	1
MSMEG_0511	-	putative sugar isomerase, AgaS family protein	11	494.6	480.9	-0.04	515.5	0.68966	1
MSMEG_0512	-	BadF/BadG/BcrA/BcrD ATPase family protein	13	26.3	16.5	-0.67	765.5	0.94918	1
MSMEG_0513	-	integral membrane protein	10	168.2	163.3	-0.04	449	0.99334	1
MSMEG_0514	-	alpha-galactosidase	24	91.9	88.5	-0.05	2533	0.77096	1
MSMEG_0515	-	sugar transporter sugar binding lipoprotein	15	114.3	132.5	0.21	1006.5	0.95137	1
MSMEG_0516	-	sugar transport system	15	154	161.7	0.07	1012	1	1
MSMEG_0517	-	sugar binding-protein dependent transporter system permease	5	26.4	28.8	0.13	112	1	1
MSMEG_0518	-	sn-glycerol-3-phosphate ABC transporter ATPase	14	321	338.8	0.08	884	0.98871	1
MSMEG_0519	-	hypothetical protein MSMEG_0519	5	112.4	92.1	-0.29	121	0.70092	1
MSMEG_0520	-	porin	5	226.1	256.8	0.18	106.5	0.81883	1
MSMEG_0522	-	pp24 protein	1	0	0	0	0	1	1
MSMEG_0523c	-	DNA-binding protein	11	50.8	55.2	0.12	511	0.60862	1
MSMEG_0524c	-	short chain dehydrogenase	5	285.2	317	0.15	110.5	0.944	1
MSMEG_0525	-	hypothetical protein MSMEG_0525	3	0	0	0	0	1	1
MSMEG_0526	-	oxidoreductase, GMC family protein	21	136.7	147.4	0.11	1986	0.99557	1
MSMEG_0527	-	2-hydroxycyclohexnecarboxyl-CoA dehydrogenase	5	23.5	45	0.94	110	0.9055	1
MSMEG_0528	-	hypothetical protein MSMEG_0528	9	41.5	43.4	0.06	358	0.90823	1
MSMEG_0529c	-	serine/threonine-protein kinase PknK	30	275.1	278	0.01	4040	0.97676	1
MSMEG_0530c	-	short chain dehydrogenase	9	41.8	41.5	-0.01	367.5	0.95261	1
MSMEG_0531c	-	putative acyl-CoA dehydrogenase	8	100.9	133.6	0.4	266	0.6249	1
MSMEG_0532c	-	transcriptional regulator, TetR family protein	5	281.4	295.1	0.07	113	1	1
MSMEG_0533c	-	gp236 protein	5	196.6	211.7	0.11	102.5	0.69241	1
MSMEG_0534c	-	permease, major facilitator family protein	15	350	316.7	-0.14	1109	0.39759	1
MSMEG_0535c	-	GntR-family protein transcriptional regulator	6	10.9	6.2	-0.82	156	0.80117	1
MSMEG_0536c	-	intracellular protease, PfpI family protein	2	912.8	776.8	-0.23	23	0.47117	1
MSMEG_0537c	-	hypothetical protein MSMEG_0537	8	814.3	742	-0.13	320	0.51576	1
MSMEG_0538c	-	regulatory protein, MarR	3	265.7	283.5	0.09	39	0.92964	1
MSMEG_0539c	-	transcriptional regulator, Crp/Fnr family protein	3	499.9	433	-0.21	46	0.65884	1
MSMEG_0540	-	transcriptional regulator, putative	8	749.4	672.9	-0.16	291	0.95889	1
MSMEG_0541	-	hypothetical protein MSMEG_0541	2	2632.1	2364.6	-0.15	21	0.68892	1
MSMEG_0542	-	ANTAR domain-containing protein	6	355.8	322.9	-0.14	165	0.93503	1
MSMEG_0543c	-	hypothetical protein MSMEG_0543	10	30.7	37.3	0.28	449	0.99156	1
MSMEG_0544	-	transcriptional regulator	9	103.8	91.6	-0.18	366.5	0.97155	1
MSMEG_0545c	-	transcriptional regulator, LuxR family protein	3	235.2	259.7	0.14	35.5	0.68567	1
MSMEG_0546c	-	hypothetical protein MSMEG_0546	14	353.8	380.3	0.1	875	0.95242	1
MSMEG_0547c	-	ISMsm5, transposase	9	216.8	210.4	-0.04	382.5	0.7608	1
MSMEG_0548	-	chromosome replication initiation inhibitor protein	6	259.6	249	-0.06	160	0.96201	1
MSMEG_0549c	-	ABC transporter, permease protein	3	66	46.1	-0.52	42	0.91623	1
MSMEG_0550c	-	sulfonate binding protein	10	114.2	144.9	0.34	427	0.71562	1
MSMEG_0551c	-	ABC nitrate/sulfonate/bicarbonate transporter, ATPase subunit	4	149.4	199.1	0.41	57.5	0.41535	1
MSMEG_0552	-	hypothetical protein MSMEG_0552	4	34.7	34.2	-0.02	73.5	0.9395	1
MSMEG_0553	-	sugar ABC transporter, substrate-binding protein, putative	17	53.9	36.6	-0.56	1307	0.95181	1
MSMEG_0554	-	ABC transporter permease protein, putative	8	734.5	778.5	0.08	297	0.81185	1
MSMEG_0555	-	ABC transporter permease protein	9	115.6	121.6	0.07	382.5	0.73371	1
MSMEG_0556	-	ABC transporter, nucleotide binding/ATPase protein	6	344.1	312	-0.14	180.5	0.5681	1
MSMEG_0557	-	hypothetical protein MSMEG_0557	1	327.6	497	0.6	1	0.19043	1
MSMEG_0558	-	hypothetical protein MSMEG_0558	2	5.1	7.1	0.47	16	0.78882	1
MSMEG_0559c	-	hypothetical protein MSMEG_0559	3	336.5	327.3	-0.04	42	0.9289	1
MSMEG_0560c	dapB	dihydrodipicolinate reductase N-terminus domain-containing protein	11	298	340.3	0.19	531.5	0.85856	1
MSMEG_0561	-	putative TetR family protein receptor protein	5	478.4	530.4	0.15	106.5	0.81885	1
MSMEG_0562c	-	hypothetical protein MSMEG_0562	5	570.6	611.5	0.1	112	1	1
MSMEG_0563	-	hypothetical protein MSMEG_0563	9	2900.7	2802.9	-0.05	357	0.89848	1
MSMEG_0564c	-	xanthine/uracil permease	5	322	341.4	0.08	110	0.93168	1
MSMEG_0565c	-	putative glycosyl transferases group 1	11	56.1	59	0.07	555	0.87253	1
MSMEG_0566c	-	aliphatic amidase	10	85.6	86.9	0.02	454.5	0.94959	1
MSMEG_0567c	-	selenophosphate synthetase	9	75.1	91.2	0.28	347	0.74398	1
MSMEG_0568c	-	radical SAM domain-containing protein	11	82.4	86.6	0.07	558	0.84461	1
MSMEG_0569c	-	flavoprotein involved in K+ transport	19	173.4	181	0.06	1658.5	0.82626	1
MSMEG_0570c	-	hypothetical protein MSMEG_0570	4	73.9	82.4	0.16	72.5	1	1
MSMEG_0571c	-	hydrolase, carbon-nitrogen family protein	12	121.9	106.8	-0.19	668.5	0.80733	1
MSMEG_0572c	-	hypothetical protein MSMEG_0572	10	130.2	154.1	0.24	449.5	1	1
MSMEG_0573c	-	putative ECF sigma factor RpoE1	9	7	7.2	0.02	365	1	1
MSMEG_0574	-	putative ECF sigma factor RpoE1	10	45.6	46.7	0.03	449	0.99156	1
MSMEG_0575	-	MmpS1 protein	4	95.9	90.7	-0.08	68	0.82903	1
MSMEG_0576	-	MmpL4 protein	28	93.5	89.4	-0.06	3496	0.90227	1
MSMEG_0577	-	major facilitator superfamily protein, putative	11	109.5	108.8	-0.01	532	0.85643	1
MSMEG_0578	-	acyl-CoA dehydrogenase middle domain-containing protein	13	112.1	125.6	0.16	729	0.72597	1
MSMEG_0579c	-	helix-turn-helix, Fis-type	6	8.2	11.3	0.47	167	0.8515	1
MSMEG_0580	-	hypothetical protein MSMEG_0580	8	148	178.4	0.27	260	0.55086	1
MSMEG_0581	gabT	4-aminobutyrate transaminase	10	186.3	168.5	-0.14	476	0.69998	1
MSMEG_0582	-	succinic semialdehyde dehydrogenase	10	53.8	59.2	0.14	431.5	0.77604	1
MSMEG_0583c	-	hypothetical protein MSMEG_0583	4	51.9	52.6	0.02	74	0.92626	1
MSMEG_0584c	-	hypothetical protein MSMEG_0584	9	350.3	365.1	0.06	362.5	0.97804	1
MSMEG_0585	-	L-carnitine dehydratase/bile acid-inducible protein F	8	394.1	410.8	0.06	286	0.97438	1
MSMEG_0586c	-	STAS domain-containing protein	3	210.7	206.8	-0.03	41.5	0.96413	1
MSMEG_0587	rhaU	L-rhamnose 1-epimerase	4	219.6	180.9	-0.28	79	0.68839	1
MSMEG_0588	-	putative rhamnose tranport protein, MFS family protein	16	560.1	552	-0.02	1167	0.91393	1
MSMEG_0589	rhaI	L-rhamnose isomerase	13	119.3	123.5	0.05	741.5	0.8405	1
MSMEG_0590	rhaD	short chain dehydrogenase	26	77.3	96.9	0.33	3010	0.89136	1
MSMEG_0591	rhaB	rhamnulokinase	14	72.5	77.5	0.1	858.5	0.81375	1
MSMEG_0592	-	putative rhamnose catabolism operon transcriptional regulator	5	0	0	0	0	1	1
MSMEG_0593c	-	hypothetical protein MSMEG_0593	3	0	0	0	0	1	1
MSMEG_0594c	-	iron-sulfur cluster binding protein	9	10.5	12.4	0.24	363	0.97471	1
MSMEG_0595c	-	glycolate oxidase	9	116.8	137.2	0.23	365	1	1
MSMEG_0596	-	GntR family transcriptional regulator	5	218.9	186.5	-0.23	115	0.93168	1
MSMEG_0597c	-	hypothetical protein MSMEG_0597	15	123.8	120.2	-0.04	992	0.86011	1
MSMEG_0598	-	hypothetical protein MSMEG_0598	4	98.4	111.1	0.18	67	0.79248	1
MSMEG_0599	-	acyl-CoA synthetase	15	191.9	197.1	0.04	1000	0.91894	1
MSMEG_0600	-	dehydrogenase	8	213.4	224.7	0.07	300	0.74741	1
MSMEG_0601c	-	hypothetical protein MSMEG_0601	3	573.4	577.1	0.01	41.5	0.96413	1
MSMEG_0602c	-	hypothetical protein MSMEG_0602	3	241.5	202.2	-0.26	38	0.8408	1
MSMEG_0603c	-	putative acyl-CoA dehydrogenase	15	374.4	360.9	-0.05	952	0.57841	1
MSMEG_0604c	-	glyoxylate reductase	5	216.1	219.6	0.02	112	1	1
MSMEG_0605c	-	hypothetical protein MSMEG_0605	11	174.4	157.5	-0.15	573	0.67686	1
MSMEG_0606c	-	transcriptional regulator, TetR family protein	13	86.3	95.3	0.14	735	0.77329	1
MSMEG_0607c	-	methyltransferase, putative, family protein	5	51.5	54	0.07	114.5	0.94767	1
MSMEG_0608	-	glyoxalase family protein	6	157.2	192.8	0.29	154	0.80895	1
MSMEG_0609c	-	helix-turn-helix domain-containing protein	9	65.8	79	0.26	348	0.7456	1
MSMEG_0610	-	beta-lactamase	7	220.1	219.1	-0.01	206	0.72468	1
MSMEG_0611	-	para-nitrobenzyl esterase	15	64.1	58.9	-0.12	1009	0.97673	1
MSMEG_0612c	-	transcriptional regulator, TetR family protein	5	229.8	208.7	-0.14	112	1	1
MSMEG_0613	-	hypothetical protein MSMEG_0613	10	447.8	451.3	0.01	465	0.82958	1
MSMEG_0614	-	methyltransferase	10	226.6	216.8	-0.06	444.5	0.93995	1
MSMEG_0615	EccA3	ATPase, AAA family protein	12	110.2	126.7	0.2	632	0.84087	1
MSMEG_0616	EccB3	hypothetical protein MSMEG_0616	12	73.4	117	0.67	591	0.49369	1
MSMEG_0617	EccC3	ftsk/SpoIIIE family protein	37	51.2	57.9	0.18	6176	0.96607	1
MSMEG_0618	-	PE family protein	3	4.1	3.9	-0.09	41	1	1
MSMEG_0619	-	PPE family protein	13	107.8	120.9	0.17	744.5	0.84971	1
MSMEG_0620	-	PE family protein	3	58.8	73.1	0.31	35.5	0.68567	1
MSMEG_0621	-	low molecular weight protein antigen 7	6	129.2	143.2	0.15	159	0.92489	1
MSMEG_0622	-	putative DNA-binding protein	6	0	0	0	0	1	1
MSMEG_0623	snm/EccD3	secretion protein Snm4	6	165.3	212.1	0.36	158	0.895	1
MSMEG_0624	-	subtilase family protein	11	2783.2	2737.6	-0.02	541	0.9652	1
MSMEG_0625c	-	hypothetical protein MSMEG_0625	13	137.3	173.5	0.34	770	0.9174	1
MSMEG_0626	-	hypothetical protein MSMEG_0626	5	25.3	21.6	-0.23	113	1	1
MSMEG_0627c	-	glycosyl transferase, family protein 39	15	44.5	49	0.14	949.5	0.56267	1
MSMEG_0628c	-	amidohydrolase family protein	16	154.2	165.7	0.1	1148.5	0.98066	1
MSMEG_0629	-	trans-aconitate 2-methyltransferase	7	0	0	0	0	1	1
MSMEG_0630c	-	hypothetical protein MSMEG_0630	8	67.5	93.9	0.48	275	0.73465	1
MSMEG_0632c	-	hypothetical protein MSMEG_0632	7	5688.2	5945.8	0.06	224	0.93912	1
MSMEG_0633c	-	PAP2 superfamily protein	15	5748.4	5772.1	0.01	1028	0.89796	1
MSMEG_0634	-	PAP2 superfamily protein	9	456.5	489.2	0.1	368	0.95639	1
MSMEG_0635	-	hypothetical protein MSMEG_0635	6	212.2	201.1	-0.08	172	0.66358	1
MSMEG_0636c	-	hypothetical protein MSMEG_0636	11	403.7	334.7	-0.27	570	0.74164	1
MSMEG_0637c	-	iron-sulfur binding oxidoreductase	19	172.8	172.6	0	1622.5	0.99226	1
MSMEG_0638	-	hypothetical protein MSMEG_0638	21	53.1	61.5	0.21	1931	0.75221	1
MSMEG_0639c	-	oligopeptide transport ATP-binding protein AppF	10	195.1	206.2	0.08	429.5	0.72449	1
MSMEG_0640c	-	oligopeptide transport ATP-binding protein OppD	7	148.1	137.4	-0.11	216	0.91588	1
MSMEG_0641c	-	binding-protein-dependent transport systems inner membrane component	17	202.5	217.1	0.1	1286.5	0.92201	1
MSMEG_0642c	-	ABC transporter permease	14	718.3	799.6	0.15	809	0.51648	1
MSMEG_0643c	-	extracellular solute-binding protein, family protein 5, putative	25	432.2	489.8	0.18	2725	0.73924	1
MSMEG_0644	-	cupin domain-containing protein	5	129.1	146.1	0.18	107	0.83028	1
MSMEG_0645	-	putative beta-1,3-glucanase	12	572.7	637	0.15	625	0.78647	1
MSMEG_0646c	-	putative transporter	12	127.8	122.8	-0.06	644.5	0.96456	1
MSMEG_0647c	phnC	phosphonate ABC transporter, ATP-binding protein	7	82.9	68.9	-0.27	229.5	0.82372	1
MSMEG_0648	-	hypothetical protein MSMEG_0648	1	0	0	0	0	1	1
MSMEG_0649c	-	phosphonate-binding periplasmic protein	7	10.5	15.7	0.58	218	0.93412	1
MSMEG_0650	-	GntR-family protein transcriptional regulator	10	276.8	279.6	0.01	463	0.85264	1
MSMEG_0651	-	hypothetical protein MSMEG_0651	12	158.5	149	-0.09	650	0.9853	1
MSMEG_0652	-	hypothetical protein MSMEG_0652	5	91.6	64.8	-0.5	115	0.9055	1
MSMEG_0654c	-	hypothetical protein MSMEG_0654	15	48.2	57.3	0.25	978.5	0.74726	1
MSMEG_0655	-	glucose 1-dehydrogenase, putative	6	102.8	89.3	-0.2	171	0.74858	1
MSMEG_0656c	-	transcriptional regulator, TetR family protein	3	345.8	391.2	0.18	41.5	0.96413	1
MSMEG_0657c	-	Rieske (2Fe-2S) domain-containing protein	18	37.5	39.9	0.09	1489	0.82	1
MSMEG_0658c	-	polyamine ABC-transporter, inner membrane subunit	10	1.1	5.4	2.26	429	0.58669	1
MSMEG_0659c	-	polyamine ABC transporter permease protein	16	73.3	73.1	0	1147	0.97147	1
MSMEG_0660c	-	extracellular solute-binding protein	24	77.6	72.5	-0.1	2629	0.78326	1
MSMEG_0661	-	glutamate-1-semialdehyde 2,1-aminomutase	12	75.2	69.7	-0.11	614	0.657	1
MSMEG_0662	-	putrescine transport ATP-binding protein PotG	10	105.8	134.5	0.35	423	0.65012	1
MSMEG_0663c	-	TetR-family protein transcriptional regulator	4	29	31.3	0.11	77	0.76517	1
MSMEG_0664	-	FAD dependent oxidoreductase	22	149.2	155	0.05	2170.5	0.97085	1
MSMEG_0665c	-	sarcosine oxidase subunit beta, putative	12	12.6	16.3	0.38	612.5	0.58804	1
MSMEG_0666	-	acetyl-CoA synthetase, putative	16	32	26.8	-0.26	1154.5	0.97214	1
MSMEG_0667	-	butyryl-CoA dehydrogenase	12	306.3	337.6	0.14	670	0.79895	1
MSMEG_0668	-	integral membrane protein	0	0	0	0	0	1	1
MSMEG_0669c	-	hypothetical protein MSMEG_0669	2	350.5	390.2	0.15	18	0.93619	1
MSMEG_0670	-	FAD dependent oxidoreductase	8	0	0	0	0	1	1
MSMEG_0671c	-	S-(hydroxymethyl)glutathione dehydrogenase	17	199.8	191.1	-0.06	1263.5	0.79894	1
MSMEG_0672c	-	hypothetical protein MSMEG_0672	2	728.2	649.2	-0.17	21	0.68892	1
MSMEG_0673c	-	hypothetical protein MSMEG_0673	2	125	110.9	-0.17	16	0.81018	1
MSMEG_0674c	-	ErfK/YbiS/YcfS/YnhG family protein	11	109.7	116.8	0.09	551	0.933	1
MSMEG_0675c	-	putative cytochrome P450 144	10	207.5	216.3	0.06	454	0.95481	1
MSMEG_0676	-	putative transcriptional regulatory protein	4	1.7	12.9	2.89	58.5	0.24779	1
MSMEG_0678	dcd	deoxycytidine triphosphate deaminase	3	0	0	0	0	1	1
MSMEG_0679	-	hypothetical protein MSMEG_0679	9	1032.5	1045.3	0.02	356	0.86897	1
MSMEG_0680	-	UDP-glucose 6-dehydrogenase	8	393.6	380.4	-0.05	287	0.99121	1
MSMEG_0681	-	P450 heme-thiolate protein	6	241.1	285.1	0.24	150	0.66455	1
MSMEG_0682	-	hypothetical protein MSMEG_0682	3	13.9	0	-3.89	45	0.37406	1
MSMEG_0683	-	hypothetical protein MSMEG_0683	1	1540.9	1669.2	0.12	3	0.66252	1
MSMEG_0684c	-	aldehyde oxidase and xanthine dehydrogenase, molybdopterin binding	25	410.7	404.5	-0.02	2782	0.90458	1
MSMEG_0685c	-	oxidoreductase, molybdopterin-binding subunit	8	4.9	3.9	-0.33	289.5	0.97137	1
MSMEG_0686c	-	oxidoreductase	3	187.1	215.1	0.2	38.5	0.89268	1
MSMEG_0687c	-	hypothetical protein MSMEG_0687	11	207.8	187.1	-0.15	545.5	0.99463	1
MSMEG_0688c	-	aminotransferase AlaT	18	1.5	0.7	-1.09	1460	0.97753	1
MSMEG_0689	-	hypothetical protein MSMEG_0689	2	192.8	222.3	0.21	16.5	0.86428	1
MSMEG_0690c	-	iron-sulfur cluster-binding protein	20	5.9	5.9	-0.02	1762.5	0.78101	1
MSMEG_0691c	-	putative transcriptional regulatory protein	8	122.6	144.1	0.23	285	0.94595	1
MSMEG_0692c	-	hypothetical protein MSMEG_0692	15	184	157.2	-0.23	1026	0.9088	1
MSMEG_0693	-	hypothetical protein MSMEG_0693	6	0.8	0.5	-0.72	162.5	1	1
MSMEG_0695	-	isoniazid inductible protein IniA	11	72.5	82	0.18	541	0.96088	1
MSMEG_0696c	-	alanine-rich protein	0	0	0	0	0	1	1
MSMEG_0697c	-	integral membrane protein	1	0	0	0	0	1	1
MSMEG_0698	-	isoniazid inductible protein IniC	8	200.6	236.4	0.24	281	0.88607	1
MSMEG_0699	-	hypothetical protein MSMEG_0699	8	31.1	39.4	0.34	286	0.97114	1
MSMEG_0700c	-	hypothetical protein MSMEG_0700	8	127.9	126.6	-0.01	285.5	0.9662	1
MSMEG_0701	-	hypothetical protein MSMEG_0701	3	6.6	0	-2.92	49.5	0.16933	1
MSMEG_0702c	-	monooxygenase	10	375.1	425.2	0.18	436	0.84168	1
MSMEG_0703c	-	hypothetical protein MSMEG_0703	2	502.2	548.8	0.13	16	0.81018	1
MSMEG_0704c	-	LpqJ protein	6	106.3	123.1	0.21	160.5	0.97302	1
MSMEG_0705c	-	putative permease of the major facilitator superfamily protein	10	365	357.5	-0.03	451	0.99401	1
MSMEG_0706c	-	4-carboxy-4-hydroxy-2-oxoadipate aldolase	5	0	0	0	0	1	1
MSMEG_0707c	-	hypothetical protein MSMEG_0707	8	29	42.9	0.57	282	0.88145	1
MSMEG_0708	-	transcriptional regulator, LysR family protein	3	160.5	124.6	-0.37	41.5	0.96413	1
MSMEG_0709	dnaK	molecular chaperone DnaK	14	0	0	0	0	1	1
MSMEG_0710	grpE	co-chaperone GrpE	5	0	0	0	0	1	1
MSMEG_0711	dnaJ	chaperone protein DnaJ	9	11.4	7.9	-0.53	355	0.78967	1
MSMEG_0712c	-	transcriptional regulator, TetR family protein	10	153.7	153.5	0	433	0.8042	1
MSMEG_0713	-	transcriptional regulator, MerR family protein	3	5	6.8	0.46	40.5	0.95166	1
MSMEG_0714c	-	acyl-CoA dehydrogenase	13	88.1	70.9	-0.31	756	0.96244	1
MSMEG_0715c	-	3-oxoacyl-	5	0	0	0	0	1	1
MSMEG_0716	-	major facilitator superfamily protein	22	130.4	134.5	0.04	2222.5	0.82936	1
MSMEG_0717c	-	aldose 1-epimerase subfamily protein	11	146.1	134.2	-0.12	559	0.84568	1
MSMEG_0718	-	acetyl-CoA synthetase	19	11.4	12.5	0.14	1543	0.45882	1
MSMEG_0719c	-	flavohemoprotein	13	26.2	24.6	-0.09	748	0.89207	1
MSMEG_0720c	-	integral membrane protein	8	68.1	73.6	0.11	274.5	0.75786	1
MSMEG_0722c	-	hypothetical protein MSMEG_0722	12	247.2	252.2	0.03	646	0.97924	1
MSMEG_0723c	-	hypothetical protein MSMEG_0723	10	78.9	67.1	-0.23	462	0.84773	1
MSMEG_0724	-	IS1137, transposase orfA	2	0	0	0	0	1	1
MSMEG_0725	-	IS1137, transposase orfB	24	92	89.8	-0.03	2594.5	0.99267	1
MSMEG_0726c	-	hypothetical protein MSMEG_0726	1	0	0	0	0	1	1
MSMEG_0727c	-	hypothetical protein MSMEG_0727	1	0	0	0	0	1	1
MSMEG_0728c	-	hypothetical protein MSMEG_0728	5	0	0	0	0	1	1
MSMEG_0729c	-	hypothetical protein MSMEG_0729	3	121.4	129.6	0.09	39.5	0.96413	1
MSMEG_0730c	-	oleandomycin glycosyltransferase	13	100	136.1	0.44	725	0.71133	1
MSMEG_0731c	-	hypothetical protein MSMEG_0731	7	133.7	115.8	-0.21	240	0.61585	1
MSMEG_0732	-	chaperone ClpB	21	99.5	51.7	-0.95	2094	0.51959	1
MSMEG_0733c	dapB	dihydrodipicolinate reductase N-terminus domain-containing protein	10	237.4	221.6	-0.1	471	0.7609	1
MSMEG_0734c	-	Rieske (2Fe-2S) domain-containing protein	17	211.6	206.2	-0.04	1333	0.80355	1
MSMEG_0735	-	putative transcriptional regulator	5	367.9	343.4	-0.1	116	0.90035	1
MSMEG_0736	-	hypothetical protein MSMEG_0736	6	0	0	0	0	1	1
MSMEG_0737	-	dehydrogenase	6	235.9	258.2	0.13	159	0.93577	1
MSMEG_0738	-	hypothetical protein MSMEG_0738	11	307.5	288.2	-0.09	576	0.67773	1
MSMEG_0739	-	spou rRNA methylase family protein	5	17.4	12.2	-0.51	113	1	1
MSMEG_0740	-	glycosyl hydrolase family protein 76	10	146.8	154.4	0.07	440	0.88458	1
MSMEG_0741	-	hypothetical protein MSMEG_0741	7	3	6.6	1.12	209	0.62278	1
MSMEG_0742c	-	transcriptional regulatory protein	5	0	0	0	0	1	1
MSMEG_0743	-	xanthine dehydrogenase	8	63.3	66.4	0.07	283.5	0.92834	1
MSMEG_0744	-	carbon monoxide dehydrogenase medium chain	7	58.1	64.9	0.16	218.5	0.96226	1
MSMEG_0745	-	2Fe-2S-binding domain-containing protein	3	0	0	0	0	1	1
MSMEG_0746	-	carbon-monoxide dehydrogenase, large subunit	28	253.8	268.2	0.08	3441	0.7719	1
MSMEG_0747	-	carbon monoxide dehydrogenase F protein	5	109.6	135.3	0.3	110	0.9055	1
MSMEG_0748	-	ATPase	12	70.5	74.7	0.08	646	0.98148	1
MSMEG_0749	-	carbon monoxide dehydrogenase subunit G (CoxG) family protein	2	84.4	72.5	-0.22	18.5	1	1
MSMEG_0750c	-	membrane protein	11	18.9	10.5	-0.85	547	0.96721	1
MSMEG_0751	-	hypothetical protein MSMEG_0751	12	85.7	83.7	-0.03	672	0.74911	1
MSMEG_0752	fbaA	fructose-bisphosphate aldolase	11	388	392	0.01	517	0.72761	1
MSMEG_0753c	-	hypothetical protein MSMEG_0753	3	953.4	901.6	-0.08	45	0.72393	1
MSMEG_0754	-	hypothetical protein MSMEG_0754	5	117.1	114.1	-0.04	109	0.89768	1
MSMEG_0755c	-	cobalt-zinc-cadmium resistance protein	6	170.1	124.7	-0.45	167.5	0.86573	1
MSMEG_0756c	-	peptidase, M50B family protein	7	243.3	235.7	-0.05	229	0.83813	1
MSMEG_0757	-	hypothetical protein MSMEG_0757	5	124	140.5	0.18	98	0.54464	1
MSMEG_0758c	-	hypothetical protein MSMEG_0758	5	22.4	36.2	0.69	99	0.57728	1
MSMEG_0759	purA	adenylosuccinate synthetase	18	0	0	0	0	1	1
MSMEG_0760	-	thioesterase family protein	5	94.9	71	-0.42	116	0.85867	1
MSMEG_0761c	-	hypothetical protein MSMEG_0761	1	65.3	58.4	-0.16	5	1	1
MSMEG_0762c	-	cytochrome P450 FAS1	8	213.1	222.4	0.06	287	0.98918	1
MSMEG_0763c	-	antibiotic transporter	12	482.1	421.7	-0.19	658	0.90401	1
MSMEG_0764c	-	Na+/H+ antiporter	18	176.3	164.7	-0.1	1492	0.83159	1
MSMEG_0765	-	zinc finger, UBP-type	5	506.7	570.4	0.17	106	0.80344	1
MSMEG_0766	purT	phosphoribosylglycinamide formyltransferase 2	7	690	670.5	-0.04	225	0.9189	1
MSMEG_0767	-	hypothetical protein MSMEG_0767	6	18.6	10.9	-0.77	164.5	0.92236	1
MSMEG_0768	-	hypothetical protein MSMEG_0768	4	338.5	292	-0.21	74.5	0.90733	1
MSMEG_0769	metZ	O-succinylhomoserine sulfhydrylase	13	162.3	183.1	0.17	742.5	0.84902	1
MSMEG_0770	-	hypothetical protein MSMEG_0770	5	49.1	32	-0.62	115	0.9055	1
MSMEG_0771c	-	short chain dehydrogenase	8	32.6	66.3	1.02	237.5	0.19915	1
MSMEG_0772c	-	phytase	14	280	273.3	-0.03	913.5	0.77651	1
MSMEG_0773	-	acetyltransferase	11	64.9	67.4	0.05	547.5	0.97247	1
MSMEG_0775c	-	metallo-beta-lactamase superfamily protein	6	232.6	196.2	-0.25	177	0.64018	1
MSMEG_0776	-	hypothetical protein MSMEG_0776	2	0	0	0	0	1	1
MSMEG_0777	-	F420-dependent glucose-6-phosphate dehydrogenase	15	233.8	243.7	0.06	952	0.62774	1
MSMEG_0778c	-	putative transcriptional regulator	6	253.2	263.6	0.06	174	0.71082	1
MSMEG_0779c	-	short chain dehydrogenase	6	366	395.1	0.11	159.5	0.94608	1
MSMEG_0780c	-	phosphotransferase enzyme family protein	11	38.2	30.8	-0.31	558	0.84461	1
MSMEG_0781	-	amino acid permease	22	217.1	236.6	0.12	2071	0.61934	1
MSMEG_0782	-	aminotransferase class-III	17	601.7	646	0.1	1268	0.81559	1
MSMEG_0783	pta	phosphate acetyltransferase	22	116.3	105.2	-0.14	2180	0.99336	1
MSMEG_0784	ackA	acetate kinase	13	40.1	33.4	-0.26	766.5	0.94639	1
MSMEG_0785c	-	hypothetical protein MSMEG_0785	6	142.9	178	0.32	159	0.92489	1
MSMEG_0786c	-	serine/threonine protein kinase	25	20.5	15	-0.45	2751.5	0.77742	1
MSMEG_0787c	-	extracellular solute-binding protein, family protein 3	7	119.9	72.2	-0.73	230.5	0.79623	1
MSMEG_0788c	-	hypothetical protein MSMEG_0788	12	125.3	66.8	-0.91	788	0.11162	1
MSMEG_0789c	thiE	thiamine-phosphate pyrophosphorylase	3	0	0	0	0	1	1
MSMEG_0790	-	hydrolase, NUDIX family protein	3	334.3	278.3	-0.26	42.5	0.89268	1
MSMEG_0791	thiO	glycine oxidase ThiO	7	149.2	169.6	0.18	182.5	0.23677	1
MSMEG_0792	thiS	sulfur carrier protein ThiS	2	0	0	0	0	1	1
MSMEG_0793	thiG	thiazole synthase	6	0	0	0	0	1	1
MSMEG_0794	-	hypothetical protein MSMEG_0794	5	17.5	21.6	0.31	113	1	1
MSMEG_0795	-	ABC transporter ATP-binding protein	6	124.2	134.8	0.12	155.5	0.83921	1
MSMEG_0796	-	ABC transporter integral membrane subunit	7	302.5	270.9	-0.16	229	0.84014	1
MSMEG_0798	-	hypothetical protein MSMEG_0798	10	46.4	32.2	-0.53	465.5	0.78441	1
MSMEG_0799	-	hypothetical protein MSMEG_0799	1	0	0	0	0	1	1
MSMEG_0800	-	hypothetical protein MSMEG_0800	2	0	0	0	0	1	1
MSMEG_0801	-	IS1096, tnpR protein	10	733.5	566.5	-0.37	464	0.84162	1
MSMEG_0802c	-	IS1096, tnpA protein	9	1840.7	1911.9	0.05	386	0.71575	1
MSMEG_0803	-	hypothetical protein MSMEG_0803	7	332.9	349.9	0.07	213	0.85336	1
MSMEG_0804c	-	hypothetical protein MSMEG_0804	1	305.9	428.4	0.49	2	0.38273	1
MSMEG_0805	-	hypothetical protein MSMEG_0805	11	98.7	92	-0.1	546	0.98696	1
MSMEG_0806	-	hydrolase	21	65.1	61.4	-0.08	1977	0.96477	1
MSMEG_0807	-	leupeptin-inactivating enzyme 1	17	253.3	253	0	1292.5	0.95662	1
MSMEG_0808	-	chalcone synthase Pks10	11	25.7	26.7	0.05	549	0.94786	1
MSMEG_0809	-	isoprenylcysteine carboxyl methyltransferase	6	39.9	56.8	0.51	157.5	0.87267	1
MSMEG_0810c	-	putative pyrimidine permease RutG	11	127.7	133.2	0.06	550	0.94535	1
MSMEG_0811	-	oxidoreductase	10	1.5	5.3	1.76	415.5	0.3949	1
MSMEG_0812c	-	amino acid transporter	13	267.8	217.9	-0.3	786	0.79636	1
MSMEG_0813c	-	hypothetical protein MSMEG_0813	6	83.5	92.5	0.15	159	0.92489	1
MSMEG_0814c	-	membrane protein	4	449	450.4	0	72	0.97539	1
MSMEG_0815	-	transcriptional regulator, TetR family protein	21	86.1	77.9	-0.14	2008	0.89649	1
MSMEG_0816c	-	flavin-binding monooxygenase	22	143.7	122.2	-0.23	2239	0.77778	1
MSMEG_0817	-	LysR-family protein transcriptional regulator	10	167	159.2	-0.07	466	0.81277	1
MSMEG_0818	-	transporter, major facilitator family protein	15	90.7	91.3	0.01	999	0.89941	1
MSMEG_0819	-	N-carbamoyl-L-amino acid amidohydrolase	10	15.3	14.2	-0.11	450	0.99002	1
MSMEG_0820c	-	hypothetical protein MSMEG_0820	1	2.5	0	-1.79	6	0.50499	1
MSMEG_0821	-	glutamyl-tRNA(Gln) amidotransferase subunit A	12	14.8	11.4	-0.37	653	0.93777	1
MSMEG_0822c	-	cytochrome P450	10	26.7	17.6	-0.6	474	0.66208	1
MSMEG_0823c	-	hypothetical protein MSMEG_0823	9	147.4	135.7	-0.12	368	0.95067	1
MSMEG_0824c	-	hypothetical protein MSMEG_0824	7	66.6	59.4	-0.17	218	0.95103	1
MSMEG_0825c	thiD	phosphomethylpyrimidine kinase	6	0	0	0	0	1	1
MSMEG_0826c	thiC	thiamine biosynthesis protein ThiC	15	14.9	22.5	0.6	967.5	0.56915	1
MSMEG_0827	-	major facilitator superfamily protein MFS_1	16	350.2	355	0.02	1133	0.89096	1
MSMEG_0828c	-	immunogenic protein MPT63	5	208.1	185.5	-0.17	115.5	0.9068	1
MSMEG_0829c	xth	exodeoxyribonuclease III	10	1329.9	1265.6	-0.07	460	0.88458	1
MSMEG_0830c	-	acetyltransferase, gnat family protein	8	21.5	31.8	0.56	272	0.69731	1
MSMEG_0831	-	short chain dehydrogenase	6	249.8	206.2	-0.28	176	0.66337	1
MSMEG_0832c	def	peptide deformylase	6	0	0	0	0	1	1
MSMEG_0833	-	hypothetical protein MSMEG_0833	4	0	0	0	0	1	1
MSMEG_0834	-	tuberculin related peptide	1	0	0	0	0	1	1
MSMEG_0835	sodC	copper/zinc superoxide dismutase	1	0	0	0	0	1	1
MSMEG_0836	-	carboxylate-amine ligase	8	125	128.4	0.04	280	0.87166	1
MSMEG_0837	-	hypothetical protein MSMEG_0837	2	0	0	0	0	1	1
MSMEG_0838c	-	AsnC-family protein transcriptional regulator	15	78	80.6	0.05	993	0.85342	1
MSMEG_0839	-	ATP-dependent protease La	5	6.4	2.1	-1.64	120	0.65475	1
MSMEG_0840c	-	hypothetical protein MSMEG_0840	9	0.6	1.7	1.58	350	0.54182	1
MSMEG_0842c	-	hypothetical protein MSMEG_0842	6	29.4	25.1	-0.23	162.5	1	1
MSMEG_0843c	-	putative monovalent cation/H+ antiporter subunit G	1	0	0	0	0	1	1
MSMEG_0844c	-	putative monovalent cation/H+ antiporter subunit F	3	286.4	144.1	-0.99	45	0.67397	1
MSMEG_0845c	-	putative monovalent cation/H+ antiporter subunit E	3	298.8	155.3	-0.94	68	0.01712	1
MSMEG_0846c	-	putative monovalent cation/H+ antiporter subunit D	16	3920	1301.8	-1.59	1517.5	0.00747	1
MSMEG_0847c	-	putative monovalent cation/H+ antiporter subunit C	6	177.8	88.2	-1.01	175.5	0.63972	1
MSMEG_0848c	-	putative monovalent cation/H+ antiporter subunit A	26	420.5	183.7	-1.19	3540	0.07378	1
MSMEG_0849	-	oxygenase	2	0	0	0	0	1	1
MSMEG_0850	-	hypothetical protein MSMEG_0850	8	162.2	175.9	0.12	280	0.84335	1
MSMEG_0851c	-	citrate transporter	10	178.3	162.4	-0.14	433	0.78739	1
MSMEG_0852c	-	CBS domain-containing protein	2	904.3	948.9	0.07	15	0.67807	1
MSMEG_0853c	-	hypothetical protein MSMEG_0853	3	204.7	155.5	-0.4	45.5	0.68567	1
MSMEG_0854	-	two-component system sensor kinase	4	23.7	27.9	0.24	71.5	1	1
MSMEG_0855c	-	hypothetical protein MSMEG_0855	5	1892.1	1835.5	-0.04	122	0.67988	1
MSMEG_0856	-	DNA-binding response regulator, LuxR family protein	8	160.6	193.1	0.27	290	0.97508	1
MSMEG_0857c	-	hypothetical protein MSMEG_0857	3	146.1	134.4	-0.12	42	0.91623	1
MSMEG_0858c	-	cell division control protein Cdc48	8	99.3	96.1	-0.05	292.5	0.92443	1
MSMEG_0859	-	transcriptional regulator, TetR family protein	5	165.6	157.8	-0.07	113	1	1
MSMEG_0860c	-	CDP-diacylglycerol--serine O-phosphatidyltransferase	7	1.5	2.2	0.54	210	0.57322	1
MSMEG_0861c	psd	phosphatidylserine decarboxylase	4	2.5	10.4	2.09	71.5	1	1
MSMEG_0862c	-	molybdopterin biosynthesis protein MoeA	8	96	91	-0.08	286	0.96756	1
MSMEG_0863c	-	short chain dehydrogenase	10	11.6	5.3	-1.13	451.5	0.97735	1
MSMEG_0864	-	membrane flanked domain-containing protein	4	545.8	528.9	-0.05	72	0.97539	1
MSMEG_0865	-	membrane flanked domain-containing protein	10	117.3	106.8	-0.13	447.5	0.9709	1
MSMEG_0866c	-	DNA or RNA helicase of superfamily protein II	17	1.9	0.5	-1.96	1353.5	0.3889	1
MSMEG_0867	-	hydrolase	8	159.8	186.3	0.22	282	0.90351	1
MSMEG_0868c	-	hypothetical protein MSMEG_0868	20	212.4	216.4	0.03	1798	0.99337	1
MSMEG_0869	-	hypothetical protein MSMEG_0869	3	62.1	65	0.07	39	0.91623	1
MSMEG_0870c	-	oxidoreductase	24	19.7	14.8	-0.42	2611	0.90933	1
MSMEG_0871c	-	putative aldehyde or xanthine dehydrogenase, molybdopterin binding subunit protein	11	54.8	45.4	-0.27	534	0.84338	1
MSMEG_0872c	-	twin-arginine translocation pathway signal	3	0	0	0	0	1	1
MSMEG_0873c	-	hypothetical protein MSMEG_0873	2	0	0	0	0	1	1
MSMEG_0874	-	transcriptional regulator, GntR family protein	3	174.3	174.1	0	40	1	1
MSMEG_0875	-	putative sialic acid transporter	19	202.4	201	-0.01	1656	0.85349	1
MSMEG_0876c	-	short chain dehydrogenase	6	41.2	27.9	-0.56	154.5	0.80777	1
MSMEG_0877	-	dihydrodipicolinate synthase	8	77.9	62.1	-0.33	291	0.94595	1
MSMEG_0878	-	transcriptional regulator	7	64.9	90.1	0.47	211	0.80182	1
MSMEG_0879c	-	hypothetical protein MSMEG_0879	1	0	0	0	0	1	1
MSMEG_0880	groEL	chaperonin GroEL	11	0	0	0	0	1	1
MSMEG_0881	-	hypothetical protein MSMEG_0881	4	125.8	145.5	0.21	70	0.92626	1
MSMEG_0882c	-	hypothetical protein MSMEG_0882	3	353.5	421.6	0.25	40.5	0.96413	1
MSMEG_0883c	-	amidohydrolase family protein	18	236.8	250.5	0.08	1457.5	1	1
MSMEG_0884	-	glyoxalase family protein	6	126.7	125.7	-0.01	158	0.895	1
MSMEG_0885c	-	hypothetical protein MSMEG_0885	4	63.2	44.9	-0.49	77	0.77704	1
MSMEG_0886c	-	serine/threonine-protein kinase PknD	10	134.8	119.3	-0.18	458.5	0.88399	1
MSMEG_0887	-	hypothetical protein MSMEG_0887	6	431.8	481.3	0.16	157	0.88466	1
MSMEG_0888	-	hypothetical protein MSMEG_0888	6	72.4	70.4	-0.04	154	0.75503	1
MSMEG_0889	-	succinic semialdehyde dehydrogenase	17	1589.1	1686.7	0.09	1233.5	0.65211	1
MSMEG_0890	-	HD domain-containing protein	7	93.7	112.7	0.27	209	0.77949	1
MSMEG_0891	-	polyphosphate kinase 2	13	297.5	276.7	-0.1	748	0.89387	1
MSMEG_0892	-	hypothetical protein MSMEG_0892	8	35.4	48.6	0.46	284.5	0.93056	1
MSMEG_0893c	-	hypothetical protein MSMEG_0893	8	748.3	783.2	0.07	275.5	0.79933	1
MSMEG_0894	-	dihydrodipicolinate reductase	23	85.7	100.6	0.23	2393	0.95345	1
MSMEG_0895	-	GntR family transcriptional regulator	7	205.7	204.4	-0.01	218	0.95951	1
MSMEG_0896	-	integral membrane transport protein	18	235.8	230.9	-0.03	1495	0.8132	1
MSMEG_0897	-	hypothetical protein MSMEG_0897	13	105.2	120	0.19	719	0.67109	1
MSMEG_0898	-	tagatose-1,6-bisphosphate aldolase GatY	5	69.8	110.5	0.66	108.5	0.8698	1
MSMEG_0899c	-	prolyl oligopeptidase family protein	36	107.9	111.9	0.05	5941	0.77917	1
MSMEG_0900	-	eptc-inducible aldehyde dehydrogenase	17	5876	5943.3	0.02	1308.5	0.95955	1
MSMEG_0901	-	hypothetical protein MSMEG_0901	3	93.5	128.2	0.45	36	0.67397	1
MSMEG_0902c	-	cyclopropane-fatty-acyl-phospholipid synthase 1	8	450.5	443.9	-0.02	307	0.70061	1
MSMEG_0903	lpdA	dihydrolipoamide dehydrogenase	18	0	0	0	0	1	1
MSMEG_0904	-	hypothetical protein MSMEG_0904	4	196.9	138	-0.51	75.5	0.81989	1
MSMEG_0905c	pcaC	hypothetical protein MSMEG_0905	4	88	82.5	-0.09	73.5	0.9395	1
MSMEG_0906c	-	DNA-binding protein	21	205.4	209.4	0.03	1989.5	0.98107	1
MSMEG_0907	-	hypothetical protein MSMEG_0907	0	0	0	0	0	1	1
MSMEG_0908	-	hypothetical protein MSMEG_0908	5	451.4	414.5	-0.12	123	0.67417	1
MSMEG_0909	-	acyl-ACP thioesterase superfamily protein	9	291	257.1	-0.18	402.5	0.50856	1
MSMEG_0910c	-	hypothetical protein MSMEG_0910	5	0.5	6.5	3.73	104	0.524	1
MSMEG_0911	aceA	isocitrate lyase	14	2230	2249.9	0.01	901.5	0.86188	1
MSMEG_0912	-	3-hydroxybutyryl-CoA dehydrogenase	8	807.5	862.3	0.09	283.5	0.93426	1
MSMEG_0913	-	methoxy mycolic acid synthase 1	16	387	402.1	0.06	1134.5	0.89933	1
MSMEG_0914c	-	hypothetical protein MSMEG_0914	15	30.7	32.1	0.06	1022	0.92769	1
MSMEG_0915c	-	polyphosphate kinase 2 superfamily protein	11	104	119.4	0.2	550.5	0.94197	1
MSMEG_0916c	-	transcriptional regulator, TetR family protein	7	182.2	195.6	0.1	218.5	0.96864	1
MSMEG_0917	-	hypothetical protein MSMEG_0917	6	45.8	40.1	-0.19	163.5	0.96113	1
MSMEG_0918	-	transcriptional regulator, XRE family protein	5	457.2	390.8	-0.23	128.5	0.51634	1
MSMEG_0919	-	heparin-binding hemagglutinin	3	149.4	126.1	-0.24	50	0.42654	1
MSMEG_0920	-	hypothetical protein MSMEG_0920	7	148.3	156.6	0.08	210	0.79909	1
MSMEG_0921	-	hypothetical protein MSMEG_0921	2	36.5	37.1	0.02	17.5	1	1
MSMEG_0922	deoC	deoxyribose-phosphate aldolase	3	32.8	65.4	1	37	0.75236	1
MSMEG_0923c	-	hypothetical protein MSMEG_0923	5	0	0	0	0	1	1
MSMEG_0924c	-	hydrolase, carbon-nitrogen family protein	7	593.6	585	-0.02	226.5	0.8854	1
MSMEG_0925c	-	hypothetical protein MSMEG_0925	3	260.6	227.3	-0.2	43	0.83339	1
MSMEG_0926c	-	hypothetical protein MSMEG_0926	4	405.8	401.1	-0.02	73	0.97539	1
MSMEG_0927c	-	hypothetical protein MSMEG_0927	5	171.3	165	-0.05	113.5	0.98132	1
MSMEG_0928	murB	UDP-N-acetylenolpyruvoylglucosamine reductase	7	0	0	0	0	1	1
MSMEG_0929	-	ErfK/YbiS/YcfS/YnhG family protein	18	339	287.6	-0.24	1509	0.75059	1
MSMEG_0930c	-	serine 3-dehydrogenase	4	14.4	17.7	0.3	67	0.71449	1
MSMEG_0931c	-	hypothetical protein MSMEG_0931	0	0	0	0	0	1	1
MSMEG_0932	-	ROK family protein	10	29.8	46.2	0.63	381	0.28223	1
MSMEG_0933	-	hypothetical protein MSMEG_0933	12	98.4	100.2	0.03	615.5	0.69216	1
MSMEG_0934	-	hypothetical protein MSMEG_0934	6	254	275	0.11	150	0.70767	1
MSMEG_0935	-	2,3-bisphosphoglycerate-dependent phosphoglycerate mutase	11	0	0	0	0	1	1
MSMEG_0936	senX3	sensor histidine kinase SenX3	6	1.2	3.9	1.68	153	0.57485	1
MSMEG_0937	regX3	DNA-binding response regulator RegX3	7	0	0	0	0	1	1
MSMEG_0938c	-	hypothetical protein MSMEG_0938	10	96.7	93.7	-0.05	455.5	0.93701	1
MSMEG_0939	-	Ppx/GppA phosphatase family protein	7	92.8	87.2	-0.09	223	0.95927	1
MSMEG_0940	-	hypothetical protein MSMEG_0940	8	3.6	5.1	0.53	286	0.962	1
MSMEG_0941	-	AP endonuclease, family protein 2	8	1678.9	1726.6	0.04	274.5	0.78818	1
MSMEG_0942	-	hypothetical protein MSMEG_0942	3	556.2	651	0.23	31	0.42678	1
MSMEG_0943	proC	pyrroline-5-carboxylate reductase	9	4.9	9.1	0.88	363	0.97471	1
MSMEG_0944	-	DNA binding domain-containing protein	2	394.4	439	0.15	15	0.6884	1
MSMEG_0945	-	hypothetical protein MSMEG_0945	3	1143.8	715.3	-0.68	46	0.65884	1
MSMEG_0946	-	NAD dependent epimerase/dehydratase family protein	14	229.2	216	-0.09	882	0.99624	1
MSMEG_0947	-	acyltransferase	9	4669.7	4816.4	0.04	384	0.72531	1
MSMEG_0948c	-	hypothetical protein MSMEG_0948	4	0	0	0	0	1	1
MSMEG_0949c	-	HAD-superfamily protein subfamily protein IB hydrolase	8	1	0	-0.98	300	0.33789	1
MSMEG_0950c	-	hypothetical protein MSMEG_0950	4	26	30.2	0.21	70.5	0.9395	1
MSMEG_0951	-	glutaredoxin 2	2	52	60.3	0.21	16.5	0.86428	1
MSMEG_0952	hemA	glutamyl-tRNA reductase	13	1.1	0	-1.05	780	0.32988	1
MSMEG_0953	hemC	porphobilinogen deaminase	11	0	0	0	0	1	1
MSMEG_0954	hemD	uroporphyrinogen-III synthase	5	0	0	0	0	1	1
MSMEG_0955c	-	hypothetical protein MSMEG_0955	5	123.5	102.8	-0.26	110.5	0.944	1
MSMEG_0956	hemB	delta-aminolevulinic acid dehydratase	12	0	0.2	0.27	630	0.33094	1
MSMEG_0957	-	hypothetical protein MSMEG_0957	4	28.4	38.7	0.44	67.5	0.76145	1
MSMEG_0958	-	hypothetical protein MSMEG_0958	1	0	0	0	0	1	1
MSMEG_0959	-	putative transmembrane protein	6	510.7	557.6	0.13	159.5	0.94608	1
MSMEG_0960	-	putative transmembrane protein	2	2.5	20.2	3.04	10.5	0.18229	1
MSMEG_0962	-	TetR-family protein transcriptional regulator	6	66.1	82.5	0.32	145.5	0.57818	1
MSMEG_0963	-	hypothetical protein MSMEG_0963	2	268.5	237.7	-0.18	25	0.29795	1
MSMEG_0964	-	pyridoxamine 5'-phosphate oxidase family protein	5	833.8	802.3	-0.06	115.5	0.91709	1
MSMEG_0965	-	porin	5	640.1	641.5	0	113	1	1
MSMEG_0966c	-	hypothetical protein MSMEG_0966	4	17.5	21	0.27	70.5	0.9395	1
MSMEG_0967c	-	hypothetical protein MSMEG_0967	2	119.6	102	-0.23	21.5	0.6081	1
MSMEG_0968	-	cytochrome P450	5	314	318.9	0.02	108.5	0.88413	1
MSMEG_0969	hemL	glutamate-1-semialdehyde aminotransferase	10	0	0	0	0	1	1
MSMEG_0970	-	phosphoglycerate mutase family protein	5	0	0	0	0	1	1
MSMEG_0971	-	hypothetical protein MSMEG_0971	3	0	0	0	0	1	1
MSMEG_0972	-	cytochrome C biogenesis protein transmembrane region	5	0	0	0	0	1	1
MSMEG_0973	-	hypothetical protein MSMEG_0973	15	0.3	1.6	2.26	1010.5	0.97296	1
MSMEG_0974	ccsB	cytochrome c-type biogenesis protein CcsB	15	0	0	0	0	1	1
MSMEG_0975	-	hypothetical protein MSMEG_0975	9	342.2	358.6	0.07	352.5	0.83935	1
MSMEG_0976c	-	hypothetical protein MSMEG_0976	3	431.7	336.8	-0.36	49	0.47993	1
MSMEG_0977	-	hypothetical protein MSMEG_0977	3	0	1.6	1.39	36	0.37406	1
MSMEG_0978	-	aminotransferase, class V superfamily protein	7	125	116	-0.11	223	0.95552	1
MSMEG_0979	-	keratin associated protein	4	0	0	0	0	1	1
MSMEG_0980c	-	signal transduction histidine kinase	13	35.6	40.5	0.18	749.5	0.89786	1
MSMEG_0981	-	two-component system regulator	3	156.7	182.1	0.22	39	0.91623	1
MSMEG_0982	-	immunogenic protein	9	294	259.9	-0.18	383.5	0.74431	1
MSMEG_0983c	-	two-component system response regulator	3	95.4	92.4	-0.05	40.5	0.96413	1
MSMEG_0984	-	trap transporter, 4tm/12tm fusion protein	27	30.6	31.4	0.04	3177	0.66209	1
MSMEG_0985c	-	sugar transporter family protein	25	1310	1534.2	0.23	2796	0.95179	1
MSMEG_0986c	-	RemM protein	5	3.1	3.8	0.28	106	0.7015	1
MSMEG_0987	-	hypothetical protein MSMEG_0987	6	343.8	330.4	-0.06	163	0.98496	1
MSMEG_0988c	menA	1,4-dihydroxy-2-naphthoate octaprenyltransferase	8	0	0	0	0	1	1
MSMEG_0989	-	hypothetical protein MSMEG_0989	0	0	0	0	0	1	1
MSMEG_0990	mtaP	5'-methylthioadenosine phosphorylase	7	79.1	60.1	-0.4	223.5	0.93713	1
MSMEG_0991	-	NAD-dependent epimerase/dehydratase	9	88	89.6	0.03	351	0.81269	1
MSMEG_0992	-	2-nitropropane dioxygenase, NPD	8	104.9	102.9	-0.03	286.5	0.9831	1
MSMEG_0993c	-	histidine kinase	3	0	0	0	0	1	1
MSMEG_0994c	resD	DNA-binding response regulator ResD	6	23.1	39.1	0.76	159.5	0.92236	1
MSMEG_0995	-	glycosyl transferase, family protein 2	7	12.1	9.7	-0.31	204.5	0.60165	1
MSMEG_0996	-	hypothetical protein MSMEG_0996	0	0	0	0	0	1	1
MSMEG_0997	-	hypothetical protein MSMEG_0997	2	0	0	0	0	1	1
MSMEG_0998	-	oxidoreductase, molybdopterin binding	10	83.9	81.4	-0.04	467	0.74836	1
MSMEG_0999c	-	integral membrane protein	10	36.5	34.7	-0.07	454	0.9534	1
MSMEG_1000	-	hypothetical protein MSMEG_1000	6	14.3	21.2	0.57	149.5	0.66568	1
MSMEG_1001	-	acetyltransferase, gnat family protein, putative	6	237.9	246.9	0.05	161	0.98496	1
MSMEG_1002	-	IS1096, tnpR protein	10	746.8	577.4	-0.37	458	0.91164	1
MSMEG_1003c	-	IS1096, tnpA protein	9	1799	1958.6	0.12	365	1	1
MSMEG_1005	-	methyltransferase type 11	7	119.1	117.8	-0.02	223	0.95552	1
MSMEG_1006	-	aminoglycoside phosphotransferase	10	138.3	134	-0.05	445	0.94518	1
MSMEG_1007c	-	transport protein	7	119.3	108.8	-0.13	222	0.97855	1
MSMEG_1008	-	hypothetical protein MSMEG_1008	2	3.5	4.5	0.36	17.5	1	1
MSMEG_1009c	-	cytochrome p450	18	294.4	319.6	0.12	1397	0.70906	1
MSMEG_1010	-	transcriptional regulator, TetR family protein	5	168.5	156.4	-0.11	115	0.93388	1
MSMEG_1011	-	short chain dehydrogenase	7	107.9	82.6	-0.38	226.5	0.86224	1
MSMEG_1012c	-	alkaline phosphatase	15	241	236.5	-0.03	1010.5	0.99016	1
MSMEG_1013c	-	hypothetical protein MSMEG_1013	8	30.9	24.1	-0.36	302	0.68271	1
MSMEG_1014c	dinB	DNA polymerase IV	5	355.7	328.7	-0.11	124	0.63728	1
MSMEG_1015c	-	transcriptional regulator, TetR family protein	4	436.5	375.1	-0.22	75	0.8838	1
MSMEG_1016	-	secreted protein	5	153.8	163.5	0.09	106.5	0.81883	1
MSMEG_1017	-	glutaredoxin	5	456.2	436.1	-0.07	116	0.89768	1
MSMEG_1019	-	ribonucleotide-diphosphate reductase subunit alpha	45	1075.5	1052.6	-0.03	9035	0.90427	1
MSMEG_1021c	-	glyoxalase/bleomycin resistance protein/dioxygenase	5	19.8	8.9	-1.14	127	0.50149	1
MSMEG_1022c	-	hypothetical protein MSMEG_1022	0	0	0	0	0	1	1
MSMEG_1023	-	integral membrane transporter	17	127.3	152.3	0.26	1222.5	0.58368	1
MSMEG_1024	-	hypothetical protein MSMEG_1024	5	261.1	242.3	-0.11	113.5	0.98132	1
MSMEG_1025c	-	TetR-family protein transcriptional regulator	8	59	62.8	0.09	286.5	0.98108	1
MSMEG_1026	-	putative acetyltransferase	11	244.8	264.3	0.11	535	0.90767	1
MSMEG_1027	-	hypothetical protein MSMEG_1027	9	132.9	140.9	0.08	357.5	0.90169	1
MSMEG_1028c	-	geranylgeranyl reductase	17	842.9	837.1	-0.01	1276	0.87214	1
MSMEG_1029	-	transcriptional regulatory protein	5	427.3	435.9	0.03	111	0.96691	1
MSMEG_1030	-	monooxygenase	20	342.5	349.3	0.03	1734	0.73063	1
MSMEG_1031	-	hypothetical protein MSMEG_1031	6	442.9	455.7	0.04	158.5	0.92421	1
MSMEG_1032	-	hypothetical protein MSMEG_1032	2	241.6	248	0.04	17	0.93619	1
MSMEG_1033	nrdF2	ribonucleotide-diphosphate reductase subunit beta	18	2447	2338.2	-0.07	1441	0.91902	1
MSMEG_1034	-	putative esterase family protein	13	3513.1	3524.6	0	750	0.91922	1
MSMEG_1035	-	hypothetical protein MSMEG_1035	22	64.9	68.5	0.08	2149	0.88684	1
MSMEG_1037c	-	alcohol dehydrogenase, zinc-containing	16	322.6	332	0.04	1206	0.69176	1
MSMEG_1038c	-	GTP cyclohydrolase II	3	904.5	846.5	-0.1	39.5	0.96413	1
MSMEG_1039c	-	periplasmic binding protein	5	164.1	169.5	0.05	110.5	0.94767	1
MSMEG_1041	serB	phosphoserine phosphatase	11	161.3	181.5	0.17	523	0.78517	1
MSMEG_1042	-	hypothetical protein MSMEG_1042	1	515.9	448.6	-0.2	7	0.38273	1
MSMEG_1043c	-	GntR-family protein transcriptional regulator	12	74.6	75.7	0.02	643	0.95748	1
MSMEG_1044	-	hypothetical protein MSMEG_1044	3	357	337.9	-0.08	40.5	0.96413	1
MSMEG_1045	-	integral membrane protein	9	147.5	128	-0.2	372.5	0.89052	1
MSMEG_1046	-	ABC-type molybdenum transport system, ATPase component	7	139.3	106.9	-0.38	240	0.63262	1
MSMEG_1047	-	nudix hydrolase	6	722.4	756.7	0.07	166	0.91183	1
MSMEG_1048	-	enoyl-CoA hydratase	5	216.9	159.8	-0.44	123	0.66815	1
MSMEG_1049	-	methyltransferase, UbiE/COQ5 family protein	9	100.8	109.2	0.12	387	0.69711	1
MSMEG_1050	-	SAM-dependent methyltransferase	12	86.5	86.6	0	651	0.97637	1
MSMEG_1051	-	immunogenic protein MPB64/MPT64	11	1258.3	1376.7	0.13	547	0.97946	1
MSMEG_1052c	-	amino acid carrier protein	23	930.8	939.2	0.01	2380	1	1
MSMEG_1053c	-	hypothetical protein MSMEG_1053	13	465.2	460.7	-0.01	793	0.74904	1
MSMEG_1054	-	hypothetical protein MSMEG_1054	1	0	0	0	0	1	1
MSMEG_1055	-	hexapeptide transferase family protein	5	537.4	540.7	0.01	114	0.96581	1
MSMEG_1057	fni	isopentenyl pyrophosphate isomerase	7	45.3	43.9	-0.05	220.5	0.98741	1
MSMEG_1058	-	IS1096, tnpR protein	9	769.4	606.5	-0.34	364	1	1
MSMEG_1059c	-	IS1096, tnpA protein	9	1793.2	1929.8	0.11	374	0.87607	1
MSMEG_1060c	-	putative Lsr2 protein	4	205.9	215.8	0.07	71	0.97539	1
MSMEG_1061c	-	phosphohydrolase	8	109.8	97.8	-0.17	291	0.95605	1
MSMEG_1062c	-	O-succinylbenzoic acid--CoA ligase	8	0	0	0	0	1	1
MSMEG_1063c	-	hypothetical protein MSMEG_1063	2	0	0	0	0	1	1
MSMEG_1064	-	phosphate/sulphate permease	5	220.8	186.6	-0.24	120.5	0.75478	1
MSMEG_1065	-	hypothetical protein MSMEG_1065	2	372	401.9	0.11	16.5	0.86428	1
MSMEG_1066	-	hypothetical protein MSMEG_1066	3	29.5	34.8	0.24	40.5	0.96413	1
MSMEG_1067c	-	hypothetical protein MSMEG_1067	5	98.4	134.7	0.45	109	0.89768	1
MSMEG_1068c	-	regulatory protein	4	356.8	349.5	-0.03	73.5	0.95361	1
MSMEG_1069	-	amino acid permease-associated region	12	313.5	314.6	0	650	0.98559	1
MSMEG_1070	-	3-oxoacyl-	7	40.2	38.8	-0.05	219.5	0.98741	1
MSMEG_1071	-	3-oxoacyl-	4	476.1	427.7	-0.15	75	0.88382	1
MSMEG_1072	speB	agmatinase	12	136.4	115.5	-0.24	674	0.74615	1
MSMEG_1073c	-	short chain dehydrogenase	8	177.3	157.7	-0.17	309	0.64831	1
MSMEG_1074	-	polysaccharide deacetylase	8	185.3	190.5	0.04	283	0.90288	1
MSMEG_1075c	menB	naphthoate synthase	9	0	0	0	0	1	1
MSMEG_1076	-	hypothetical protein MSMEG_1076	1	0	0	0	0	1	1
MSMEG_1077c	-	hypothetical protein MSMEG_1077	4	184.1	201.9	0.13	72	0.97539	1
MSMEG_1078c	-	hydrolase	7	14.5	16.1	0.15	209	0.72049	1
MSMEG_1079	-	hypothetical protein MSMEG_1079	3	0	0	0	0	1	1
MSMEG_1080	-	large subunit of N,N-dimethylformamidase	38	72.1	68	-0.08	6641.5	0.7362	1
MSMEG_1081	-	hypothetical protein MSMEG_1081	1	0	0	0	0	1	1
MSMEG_1082	-	putative response regulator	9	111.6	127.1	0.19	345	0.72531	1
MSMEG_1083c	-	hypothetical protein MSMEG_1083	4	0	0	0	0	1	1
MSMEG_1084	-	peptide/opine/nickel uptake family protein ABC transporter, periplasmic substrate-binding protein, putative	23	296.1	288.4	-0.04	2372	0.96637	1
MSMEG_1085	-	dipeptide transport system permease protein DppB	10	124.2	117.8	-0.08	441	0.8858	1
MSMEG_1086	-	ABC transporter permease protein	10	101.5	122.2	0.27	445.5	0.94184	1
MSMEG_1088	gatA	glutamyl-tRNA(Gln)/aspartyl-tRNA(Asn) amidotransferase, A subunit	11	84.3	71.8	-0.23	564	0.77991	1
MSMEG_1089	-	hypothetical protein MSMEG_1089	1	0	0	0	0	1	1
MSMEG_1090	-	amidase	19	14.2	13.3	-0.09	1558	0.61579	1
MSMEG_1091	ureE	urease accessory protein UreE	3	9.4	7.8	-0.28	41.5	0.95166	1
MSMEG_1092	-	urease accessory protein UreF	4	0	0	0	0	1	1
MSMEG_1093	-	bifunctional urease subunit gamma/beta	3	141.6	186.9	0.4	38	0.83339	1
MSMEG_1094	ureC	urease subunit alpha	14	124.9	133.3	0.09	884	0.98843	1
MSMEG_1095	ureG	urease accessory protein UreG	3	46.3	52.8	0.19	38.5	0.88439	1
MSMEG_1096	-	urease accessory protein UreD, putative	6	413.3	464.9	0.17	148	0.66929	1
MSMEG_1097	-	glycosyl transferase, group 2 family protein	6	9.1	26.5	1.54	161	0.98453	1
MSMEG_1098c	-	acyl-CoA synthetase	15	141.2	168.2	0.25	991	0.85752	1
MSMEG_1099c	-	hypothetical protein MSMEG_1099	0	0	0	0	0	1	1
MSMEG_1100c	-	DGPFAETKE domain-containing protein	4	17.6	18	0.03	73	0.97256	1
MSMEG_1101	-	hypothetical protein MSMEG_1101	14	104.2	105.1	0.01	893	0.90981	1
MSMEG_1102	-	twin-arginine translocation pathway signal	14	139.4	143.7	0.04	884.5	0.98334	1
MSMEG_1103	-	O-succinylbenzoate synthase	6	0	0	0	0	1	1
MSMEG_1104	-	hypothetical protein MSMEG_1104	1	0	0	0	0	1	1
MSMEG_1106	-	transcriptional regulator, AraC family protein	6	39.6	37.1	-0.09	170	0.77113	1
MSMEG_1107	-	isonitrile hydratase, putative	5	46.4	32.9	-0.49	115.5	0.9068	1
MSMEG_1108	-	hydrolase, alpha/beta fold family protein	9	168.6	208.5	0.31	358	0.90153	1
MSMEG_1109	-	2-succinyl-6-hydroxy-2,4-cyclohexadiene-1-carboxylic acid synthase/2-oxoglutarate decarboxylase	12	0	0	0	0	1	1
MSMEG_1110	-	transmembrane protein	5	8.5	7.2	-0.24	119	0.7015	1
MSMEG_1111c	-	hypothetical protein MSMEG_1111	9	199.8	239	0.26	356.5	0.88666	1
MSMEG_1112c	-	aconitate hydratase	16	95.9	110.3	0.2	1129.5	0.85888	1
MSMEG_1113	-	glycosyl transferase	8	26.8	32.4	0.27	286.5	0.97137	1
MSMEG_1114c	-	short chain dehydrogenase	8	173.4	161	-0.11	295	0.88501	1
MSMEG_1115	ubiE	ubiquinone/menaquinone biosynthesis methyltransferase	7	0	0	0	0	1	1
MSMEG_1116c	-	gamma-glutamylisopropylamide synthetase	20	144	145.2	0.01	1777	0.8956	1
MSMEG_1117	-	transcriptional regulator	6	8.8	10.9	0.32	159.5	0.93613	1
MSMEG_1118	-	amino acid permease	25	30.9	31.6	0.03	2726	0.68051	1
MSMEG_1119	-	glutamine amidotransferase, class I	10	43.9	33.1	-0.41	457	0.91358	1
MSMEG_1120	-	nitrilase/cyanide hydratase and apolipoprotein N-acyltransferase	13	84.8	91.1	0.1	725.5	0.70349	1
MSMEG_1121	-	hypothetical protein MSMEG_1121	1	0	0	0	0	1	1
MSMEG_1122c	-	hypothetical protein MSMEG_1122	1	0	0	0	0	1	1
MSMEG_1123	-	cobalamin synthesis protein	8	24.5	27.2	0.15	286.5	0.97137	1
MSMEG_1124	-	putative ferredoxin FdxA	8	122.9	129.2	0.07	289.5	0.98206	1
MSMEG_1125	-	regulatory protein, ArsR	5	163.1	172.8	0.08	117	0.85708	1
MSMEG_1126	-	hypothetical protein MSMEG_1126	7	56	73.1	0.39	207	0.71281	1
MSMEG_1127	-	transmembrane protein	5	43	38.3	-0.17	119	0.75889	1
MSMEG_1128c	-	hypothetical protein MSMEG_1128	2	0	0	0	0	1	1
MSMEG_1129	-	D-amino-acid dehydrogenase	12	49.4	64	0.37	584	0.43552	1
MSMEG_1130	-	hypothetical protein MSMEG_1130	10	320.1	335.5	0.07	443	0.92053	1
MSMEG_1131	-	tryptophan-rich sensory protein	6	19.8	21.4	0.11	155	0.766	1
MSMEG_1132c	-	FAD binding domain-containing protein	11	238.4	267.4	0.17	531.5	0.86627	1
MSMEG_1133	-	bifunctional short chain isoprenyl diphosphate synthase	8	0	0	0	0	1	1
MSMEG_1134	-	heat shock protein HtpX	10	183.4	213.4	0.22	391	0.37942	1
MSMEG_1135	-	hypothetical protein MSMEG_1135	4	36.7	47.7	0.38	68.5	0.81989	1
MSMEG_1136	-	hypothetical protein MSMEG_1136	6	1576.5	1490.1	-0.08	161	0.98496	1
MSMEG_1137c	-	amino acid permease-associated region	25	216.1	186.9	-0.21	2845	0.895	1
MSMEG_1138c	-	alcohol dehydrogenase 1	10	272.4	303.2	0.15	425	0.71279	1
MSMEG_1139	-	transcription regulator	6	124	116	-0.1	163.5	0.97302	1
MSMEG_1140c	-	NAD(P)H-dependent glycerol-3-phosphate dehydrogenase	11	135.6	126.2	-0.1	552	0.92785	1
MSMEG_1141	-	ABC-transporter integral membrane protein	4	117.7	90.3	-0.38	75.5	0.81989	1
MSMEG_1142	-	ABC-transporter integral membrane protein	14	11.9	21.5	0.86	839.5	0.61489	1
MSMEG_1143	-	mce related protein	11	40.2	38.4	-0.07	547.5	0.96198	1
MSMEG_1144	-	virulence factor Mce family protein	10	42.6	33.7	-0.34	464	0.82697	1
MSMEG_1145	-	virulence factor Mce family protein	8	49.8	64.8	0.38	285	0.94595	1
MSMEG_1146	-	virulence factor Mce family protein	9	1.1	4.2	1.92	350	0.63008	1
MSMEG_1147	-	mce related protein	6	11.6	9.5	-0.28	161.5	1	1
MSMEG_1148	-	mce related protein	16	52.7	47.2	-0.16	1156.5	0.96567	1
MSMEG_1149	-	hypothetical protein MSMEG_1149	3	93.3	97.3	0.06	41	1	1
MSMEG_1150	-	hypothetical protein MSMEG_1150	13	0.7	0.6	-0.08	760.5	0.98957	1
MSMEG_1151	-	DNA-binding protein	10	62.8	74.2	0.24	434	0.80778	1
MSMEG_1152	-	citrate-proton symporter	20	119.1	108.6	-0.13	1828	0.86339	1
MSMEG_1153	-	FAD dependent oxidoreductase	18	90	78.2	-0.2	1511.5	0.7144	1
MSMEG_1154	-	formyl-coenzyme A transferase	12	61.4	51.8	-0.24	670	0.78062	1
MSMEG_1155	-	carnitinyl-CoA dehydratase	5	135.7	108.9	-0.32	113	1	1
MSMEG_1156	-	dihydrodipicolinate synthetase	5	173.8	208.8	0.26	95	0.46619	1
MSMEG_1157	-	short chain dehydrogenase	4	164.6	133.7	-0.3	78	0.73435	1
MSMEG_1158	-	5-oxovalerate dehydrogenase	11	17.6	15.8	-0.15	561	0.70105	1
MSMEG_1159	-	ABC transporter component A	14	4.3	3.1	-0.46	844.5	0.51575	1
MSMEG_1160	-	ABC-type nitrate/sulfonate/bicarbonate transport system ATPase component	7	0	0	0	0	1	1
MSMEG_1161	-	taurine transport system permease protein TauC	7	1.5	6.4	2.13	219.5	0.9803	1
MSMEG_1162	-	nitrilotriacetate monooxygenase component A	18	77.1	72.2	-0.09	1507	0.71748	1
MSMEG_1163	-	hypothetical protein MSMEG_1163	2	54.4	24.6	-1.15	15	0.65531	1
MSMEG_1165c	-	nucleotide-binding protein	3	448.2	513.8	0.2	37	0.79108	1
MSMEG_1167c	-	cytochrome P450	15	83	85.5	0.04	1059	0.67008	1
MSMEG_1168	-	putative transcriptional regulator	5	94.7	102.6	0.12	111.5	0.98339	1
MSMEG_1169	-	integral membrane transport protein	17	397.1	402.8	0.02	1356	0.69513	1
MSMEG_1170	-	hypothetical protein MSMEG_1170	0	0	0	0	0	1	1
MSMEG_1171c	-	low molecular weight phosphotyrosine protein phosphatase	6	111.2	95.9	-0.21	166	0.895	1
MSMEG_1172c	arsB	arsenical-resistance protein	13	49.2	70.6	0.52	727	0.70375	1
MSMEG_1173c	-	transcriptional regulator, ArsR family protein	2	295.8	326	0.14	16	0.80887	1
MSMEG_1174c	-	cadmium inducible protein cadi	3	136.3	128.1	-0.09	42.5	0.89268	1
MSMEG_1175	-	putative transcriptional regulatory protein	4	227.7	270.3	0.25	64.5	0.68382	1
MSMEG_1176	-	hypothetical protein MSMEG_1176	23	5.8	4.4	-0.38	2483	0.48706	1
MSMEG_1177c	-	cytosine/purines/uracil/thiamine/allantoin permease family protein	23	28.6	25.5	-0.17	2482	0.53459	1
MSMEG_1178	-	transcriptional regulator	6	0	0	0	0	1	1
MSMEG_1179	hutU	urocanate hydratase	16	94.1	91.2	-0.05	1129	0.84836	1
MSMEG_1180	-	allantoate amidohydrolase	8	34.6	25.3	-0.45	290.5	0.94278	1
MSMEG_1181	hutF	N-formimino-L-glutamate deiminase	15	61.1	73.4	0.27	1004.5	0.94551	1
MSMEG_1182	hutI	imidazolonepropionase	10	0	0	0	0	1	1
MSMEG_1183	hutH	histidine ammonia-lyase	5	53.6	56.4	0.07	112	1	1
MSMEG_1184	-	serine esterase, cutinase family protein	10	173.9	182	0.07	467	0.77457	1
MSMEG_1185c	-	transcriptional regulator, AsnC family protein	12	97.2	88	-0.14	651.5	0.96456	1
MSMEG_1186	-	putative permease	19	213.3	223.9	0.07	1557.5	0.70095	1
MSMEG_1187	-	N-acyl-D-aspartate deacylase	20	445.3	455.9	0.03	1787	0.94408	1
MSMEG_1188c	-	hypothetical protein MSMEG_1188	14	1071.4	1148	0.1	852	0.78973	1
MSMEG_1189	-	hypothetical protein MSMEG_1189	17	155.3	152.5	-0.03	1297	0.98288	1
MSMEG_1190	-	serine/threonine-protein kinase PknD	23	86.9	94.8	0.13	2316.5	0.76315	1
MSMEG_1191c	-	hypothetical protein MSMEG_1191	1	10.4	26.3	1.34	3	0.64283	1
MSMEG_1192c	-	M23 peptidase domain-containing protein	13	77.9	81.6	0.07	719	0.67213	1
MSMEG_1193	-	TROVE domain-containing protein	21	557.3	508.6	-0.13	1985	1	1
MSMEG_1194c	-	hypothetical protein MSMEG_1194	3	0	0	0	0	1	1
MSMEG_1195	-	hypothetical protein MSMEG_1195	13	142.4	144.2	0.02	741	0.83999	1
MSMEG_1196c	-	SNF2 domain-containing protein	15	34.5	40.7	0.24	976	0.70893	1
MSMEG_1197c	-	transcriptional regulator, LuxR family protein	2	1249.6	1089.4	-0.2	21	0.68892	1
MSMEG_1198	-	hypothetical protein MSMEG_1198	5	69.4	42.5	-0.71	109.5	0.91038	1
MSMEG_1199c	-	hypothetical protein MSMEG_1199	16	138.4	116.5	-0.25	1207	0.68008	1
MSMEG_1200	-	serine/threonine-protein kinase PknD	16	453.2	465.7	0.04	1144	0.95534	1
MSMEG_1201c	-	hypothetical protein MSMEG_1201	4	0	0	0	0	1	1
MSMEG_1202	-	hypothetical protein MSMEG_1202	2	0	0	0	0	1	1
MSMEG_1203c	-	methoxy mycolic acid synthase 1	17	144	168.6	0.23	1272	0.8383	1
MSMEG_1204	-	3-oxoacyl-(acyl carrier protein) synthase II	9	196.3	160.6	-0.29	386.5	0.70467	1
MSMEG_1205c	-	cyclopropane-fatty-acyl-phospholipid synthase 1	13	227.2	244.1	0.1	745	0.86135	1
MSMEG_1206c	-	hypothetical protein MSMEG_1206	0	0	0	0	0	1	1
MSMEG_1207	-	glycosyltransferase, group I	11	593.9	586.4	-0.02	532	0.83392	1
MSMEG_1208	-	glycosyltransferase, group I	8	1331.3	1315.3	-0.02	284	0.93793	1
MSMEG_1209	-	glycosidase	20	72.8	55.7	-0.39	1818.5	0.91167	1
MSMEG_1210c	-	hypothetical protein MSMEG_1210	9	129.1	114.9	-0.17	357	0.88712	1
MSMEG_1211	-	Fatty acid desaturase	18	111.1	109.6	-0.02	1476	0.91062	1
MSMEG_1212	-	hypothetical protein MSMEG_1212	1	150.6	102.2	-0.56	6	0.66252	1
MSMEG_1213	-	cytochrome P450 monooxygenase	8	156	159.6	0.03	281	0.88994	1
MSMEG_1214	-	oxidoreductase	10	3.1	3.7	0.24	449.5	1	1
MSMEG_1215	-	serine/threonine-protein kinase PknE, putative	5	16	22.5	0.5	104	0.70087	1
MSMEG_1216c	-	ABC-type transport system periplasmic substrate-binding protein	16	154	143.6	-0.1	1155.5	0.98168	1
MSMEG_1217c	-	ABC-type transport system ATP-binding protein I	6	120.7	124	0.04	161	0.98496	1
MSMEG_1218c	-	ABC-type transport system ATP-binding protein II	3	14.8	36.3	1.3	36	0.67397	1
MSMEG_1219c	-	ABC-type transport system permease protein II	18	47	47.3	0.01	1440	0.89037	1
MSMEG_1220c	-	ABC-type transport system permease protein I	12	337.2	370.3	0.14	617.5	0.73452	1
MSMEG_1221	-	rifampin ADP-ribosyl transferase	6	1522.8	1466.1	-0.05	165	0.93577	1
MSMEG_1222c	-	ISMsm6, transposase	18	247.2	228.8	-0.11	1463	0.97632	1
MSMEG_1223c	-	hypothetical protein MSMEG_1223	3	740.1	712.2	-0.06	45	0.72393	1
MSMEG_1224	-	rifampin ADP-ribosyl transferase	1	1020.8	1047.1	0.04	4	1	1
MSMEG_1225c	-	hypothetical protein MSMEG_1225	10	115	110	-0.06	444.5	0.93702	1
MSMEG_1226	-	sulfatase-modifying factor 1	10	90.2	96.7	0.1	450.5	1	1
MSMEG_1227	-	transcriptional regulator, GntR family protein	3	0	0	0	0	1	1
MSMEG_1228	-	sulfatase	20	54.3	47.3	-0.2	1749	0.76046	1
MSMEG_1229	gyrB	DNA gyrase subunit B	21	40.2	38.6	-0.06	2030	0.77402	1
MSMEG_1230c	-	hypothetical protein MSMEG_1230	2	34.9	35.3	0.02	18.5	1	1
MSMEG_1231c	-	inner membrane protein YidH	3	30	18.1	-0.73	42	0.91623	1
MSMEG_1232	-	ABC transporter substrate-binding protein	22	41.3	30.3	-0.45	2151	0.88398	1
MSMEG_1234	-	taurine import ATP-binding protein TauB	3	0	0	0	0	1	1
MSMEG_1235	-	sulfate permease	9	82.7	85.8	0.05	375	0.83662	1
MSMEG_1236c	-	Mpr protein	4	9.6	28.2	1.56	66	0.65478	1
MSMEG_1237	-	hypothetical protein MSMEG_1237	2	0	0	0	0	1	1
MSMEG_1238	-	type III restriction enzyme, res subunit	76	76.5	71.7	-0.09	26071.5	0.93865	1
MSMEG_1239c	-	ISMsm4, transposase	16	195.1	172.1	-0.18	1206	0.68953	1
MSMEG_1240	-	hypothetical protein MSMEG_1240	63	37.3	34.6	-0.11	17873	0.98469	1
MSMEG_1241	-	hypothetical protein MSMEG_1241	30	82.3	80.7	-0.03	4048.5	0.99702	1
MSMEG_1242	iscS	cysteine desulfurase IscS	24	411.8	356.4	-0.21	2586	0.98187	1
MSMEG_1243	-	hypothetical protein MSMEG_1243	26	305.9	303.2	-0.01	3026	0.95231	1
MSMEG_1244	-	hypothetical protein MSMEG_1244	72	886.2	842.9	-0.07	23532	0.87056	1
MSMEG_1245	-	phosphoadenosine phosphosulfate reductase	21	1659.3	1575.2	-0.08	2037	0.79674	1
MSMEG_1246	-	hypothetical protein MSMEG_1246	36	320	307.3	-0.06	5888	0.89868	1
MSMEG_1247	-	hypothetical protein MSMEG_1247	7	229.1	212.6	-0.11	229	0.83864	1
MSMEG_1248	-	hypothetical protein MSMEG_1248	24	381.4	383.3	0.01	2616.5	0.91392	1
MSMEG_1249c	-	ISMsm7, transposase orfB	12	53.3	41.7	-0.35	712	0.41563	1
MSMEG_1250c	-	ISMsm7, transposase orfA	2	0	0	0	0	1	1
MSMEG_1251	-	hypothetical protein MSMEG_1251	8	617	578.5	-0.09	290	0.97363	1
MSMEG_1252	-	hypothetical protein MSMEG_1252	48	142.7	145.6	0.03	10298	0.9146	1
MSMEG_1253	-	hypothetical protein MSMEG_1253	79	137.5	140.3	0.03	28171	0.9473	1
MSMEG_1254	-	DEAD/DEAH box helicase	102	320.3	338.7	0.08	47016.5	0.92565	1
MSMEG_1255	-	UvrD/Rep helicase	33	166.2	156.9	-0.08	4955	0.88396	1
MSMEG_1256	-	hypothetical protein MSMEG_1256	7	83.4	114.9	0.46	215.5	0.8871	1
MSMEG_1257	-	IS1096, tnpR protein	10	735.9	581.9	-0.34	459	0.89991	1
MSMEG_1258c	-	IS1096, tnpA protein	9	1825.7	1972.9	0.11	380.5	0.78825	1
MSMEG_1259	-	hypothetical protein MSMEG_1259	8	293.3	302.2	0.04	276.5	0.81574	1
MSMEG_1260c	-	hypothetical protein MSMEG_1260	19	172.3	169.4	-0.02	1630.5	0.97286	1
MSMEG_1261	-	hypothetical protein MSMEG_1261	26	119.8	119.5	0	3059	0.94852	1
MSMEG_1262	-	hypothetical protein MSMEG_1262	3	680.7	653	-0.06	48	0.5365	1
MSMEG_1263c	-	hypothetical protein MSMEG_1263	11	439.7	466.2	0.08	534	0.89628	1
MSMEG_1264	-	prophage Lp1 protein 5	9	378.8	419.8	0.15	357	0.90294	1
MSMEG_1265c	-	hypothetical protein MSMEG_1265	21	130.7	124.6	-0.07	2048.5	0.74685	1
MSMEG_1266c	-	ankyrin repeat-containing protein	4	15.9	17	0.1	70.5	0.9395	1
MSMEG_1268	-	nudix hydrolase	5	122.7	125.3	0.03	114	0.96464	1
MSMEG_1269c	-	Ser/Thr protein phosphatase family protein	21	64.9	55.4	-0.23	1966	0.91837	1
MSMEG_1270c	-	hypothetical protein MSMEG_1270	4	301.4	321.8	0.09	71	0.97539	1
MSMEG_1271c	-	hypothetical protein MSMEG_1271	7	38	25.9	-0.55	226.5	0.86224	1
MSMEG_1272c	-	putative ribosylglycohydrolase	14	95.1	86.8	-0.13	887	0.95701	1
MSMEG_1273c	-	hypothetical protein MSMEG_1273	7	204	200.7	-0.02	218.5	0.96226	1
MSMEG_1274c	-	gluconolactonase	12	138.2	144.5	0.06	649	0.9952	1
MSMEG_1275c	-	HNH nuclease, putative	12	110.2	116.2	0.08	610.5	0.63528	1
MSMEG_1276	-	hypothetical protein MSMEG_1276	2	121.1	156.8	0.37	16.5	0.86428	1
MSMEG_1277	-	hypothetical protein MSMEG_1277	0	0	0	0	0	1	1
MSMEG_1278	-	death-on-curing protein	6	314	361.7	0.2	168.5	0.84784	1
MSMEG_1279	-	hypothetical protein MSMEG_1279	18	281.1	290	0.04	1455.5	0.98952	1
MSMEG_1280	-	putative cytoplasmic protein	11	272.9	314.3	0.2	523.5	0.7824	1
MSMEG_1281	-	hypothetical protein MSMEG_1281	32	176.4	174.2	-0.02	4506	0.77188	1
MSMEG_1282	-	putative cytoplasmic protein	16	60.2	63.3	0.07	1132	0.86039	1
MSMEG_1283	-	ribbon-helix-helix transcription factor, family protein	5	577.4	555.7	-0.06	100.5	0.632	1
MSMEG_1284	-	PilT domain-containing protein	7	127.3	149.1	0.23	201	0.61587	1
MSMEG_1285c	-	TPR repeat-containing protein	18	189	151.5	-0.32	1425.5	0.82513	1
MSMEG_1286c	-	sulfatase family protein	28	68.4	72.4	0.08	3550	0.93027	1
MSMEG_1287c	-	cyclase/dehydrase superfamily protein	6	171.6	191.1	0.16	162	0.98496	1
MSMEG_1288	-	hypothetical protein MSMEG_1288	10	130.6	113	-0.21	451	0.99334	1
MSMEG_1289c	-	hypothetical protein MSMEG_1289	10	226.6	223.1	-0.02	450	0.99334	1
MSMEG_1290	ilvD	dihydroxy-acid dehydratase	18	123.1	107.5	-0.19	1455.5	0.98758	1
MSMEG_1291c	-	putative oxidoreductase	25	66.9	64.9	-0.04	2857	0.83585	1
MSMEG_1292c	-	FAD binding domain-containing protein	4	66.8	56.3	-0.25	75.5	0.81989	1
MSMEG_1293	-	xanthine/uracil permeases family protein	16	76.5	89.4	0.22	1125.5	0.81663	1
MSMEG_1294	-	putative OHCU decarboxylase	4	10.3	1.5	-2.81	74	0.89391	1
MSMEG_1295	-	transthyretin	9	89.8	88.2	-0.03	366	0.97471	1
MSMEG_1296	-	uricase	12	7.1	7	-0.03	634	0.80811	1
MSMEG_1297	-	hydroxydechloroatrazine ethylaminohydrolase	11	18.4	27.9	0.61	540.5	0.94679	1
MSMEG_1298	-	guanine deaminase	16	55.2	58.2	0.08	1158	0.95706	1
MSMEG_1299	-	oxidoreductase, 2OG-Fe(II) oxygenase family protein	10	62.7	72.6	0.21	449	0.99334	1
MSMEG_1300	-	hypothetical protein MSMEG_1300	6	189.4	188.4	-0.01	165	0.93542	1
MSMEG_1301	-	NanT3	3	106.3	90.1	-0.24	42.5	0.88439	1
MSMEG_1302	-	alkylphosphonate uptake protein	2	0	0	0	0	1	1
MSMEG_1303c	-	putative transcriptional regulator	7	75.9	64.2	-0.24	235	0.72067	1
MSMEG_1304	-	rhizopine catabolism protein	14	50.5	32.2	-0.65	953	0.46174	1
MSMEG_1305c	-	TetR family protein regulatory protein	11	99.5	92.6	-0.1	566	0.77607	1
MSMEG_1306c	-	aldehyde dehydrogenase (NAD) family protein	21	82.7	90.5	0.13	2004	0.89996	1
MSMEG_1307c	-	EthD protein	6	84.1	90.3	0.1	160.5	0.97399	1
MSMEG_1308c	-	peptidase S15	23	59	56	-0.07	2383	0.9907	1
MSMEG_1309	-	hypothetical protein MSMEG_1309	2	0	0	0	0	1	1
MSMEG_1310	-	TnpC protein	18	166.9	174.7	0.07	1456	0.99251	1
MSMEG_1311c	-	oligopeptide transporter, OPT family protein	14	270.7	260.1	-0.06	885	0.98141	1
MSMEG_1312	-	hypothetical protein MSMEG_1312	7	204.7	186.7	-0.13	225	0.91865	1
MSMEG_1313	-	secreted protein	21	56.4	54.1	-0.06	2013	0.85658	1
MSMEG_1314c	-	hypothetical protein MSMEG_1314	8	128.2	116.3	-0.14	308	0.68691	1
MSMEG_1315	-	transporter, small conductance mechanosensitive ion channel (MscS) family protein	11	656.1	722.2	0.14	564	0.80732	1
MSMEG_1316c	prfC	peptide chain release factor 3	12	30.5	44.9	0.56	626	0.76297	1
MSMEG_1317c	-	transcriptional regulator	4	0	0	0	0	1	1
MSMEG_1318c	-	polysaccharide deacetylase family protein	11	10.4	11.2	0.11	543.5	0.99239	1
MSMEG_1319c	-	Asp/Glu racemase	8	108.5	122.7	0.18	257	0.51819	1
MSMEG_1320c	-	major facilitator superfamily protein MFS_1	13	200.4	201.7	0.01	726	0.72856	1
MSMEG_1321	-	5-carboxymethyl-2-hydroxymuconate delta-isomerase	7	3455.5	3825.1	0.15	208	0.73788	1
MSMEG_1322	-	ErfK/YbiS/YcfS/YnhG family protein	17	720.5	540.9	-0.41	1386	0.56657	1
MSMEG_1323	-	hypothetical protein MSMEG_1323	2	194.4	127.6	-0.61	20.5	0.73246	1
MSMEG_1324c	-	hypothetical protein MSMEG_1324	1	0	0	0	0	1	1
MSMEG_1325c	recD	exodeoxyribonuclease V, alpha subunit	12	53.3	47.8	-0.16	693	0.54478	1
MSMEG_1326	-	hypothetical protein MSMEG_1326	2	29.4	91.7	1.64	13	0.42167	1
MSMEG_1327c	recB	exodeoxyribonuclease V, beta subunit	26	143.3	137	-0.07	3054	0.96023	1
MSMEG_1328c	recC	exodeoxyribonuclease V, gamma subunit	23	131.3	137.5	0.07	2195	0.36817	1
MSMEG_1329c	-	major facilitator superfamily protein MFS_1, putative	5	246	220	-0.16	113.5	0.98132	1
MSMEG_1330c	-	MarR-family protein transcriptional regulator	4	246.5	281.4	0.19	65.5	0.72703	1
MSMEG_1331c	-	enoyl-CoA hydratase	4	295.8	263.6	-0.17	76	0.82903	1
MSMEG_1332c	-	hypothetical protein MSMEG_1332	16	170.4	169.4	-0.01	1128	0.85184	1
MSMEG_1333c	-	hypothetical protein MSMEG_1333	11	245.4	271.7	0.15	518	0.7317	1
MSMEG_1334c	-	metallo-beta-lactamase family protein	8	198.8	181.1	-0.13	294	0.90351	1
MSMEG_1335	-	transcriptional regulator, BadM/Rrf2 family protein	2	102.8	100.2	-0.04	18.5	1	1
MSMEG_1336	-	flavohemoprotein, putative	10	147.5	167	0.18	426	0.71831	1
MSMEG_1339	rpmG	ribosomal protein L33	3	68.7	61.2	-0.17	40	1	1
MSMEG_1340	-	(3R)-hydroxyacyl-ACP dehydratase subunit HadA	10	201.5	202.4	0.01	449.5	1	1
MSMEG_1341	-	(3R)-hydroxyacyl-ACP dehydratase subunit HadB	3	0	0	0	0	1	1
MSMEG_1342	-	(3R)-hydroxyacyl-ACP dehydratase subunit HadC	4	9.3	10.2	0.14	71	0.97254	1
MSMEG_1344	secE	preprotein translocase subunit SecE	5	0	0	0	0	1	1
MSMEG_1345	nusG	transcription antitermination protein NusG	5	0	0	0	0	1	1
MSMEG_1346	rplK	50S ribosomal protein L11	2	0	0	0	0	1	1
MSMEG_1347	rplA	50S ribosomal protein L1	6	0	0	0	0	1	1
MSMEG_1348c	-	RNA polymerase ECF-subfamily protein sigma factor	12	243.7	238.8	-0.03	680.5	0.69217	1
MSMEG_1349c	-	DGPF domain-containing protein	8	452.4	396.5	-0.19	312.5	0.61115	1
MSMEG_1350c	-	cyclopropane-fatty-acyl-phospholipid synthase 1	16	103.9	118.2	0.19	1127	0.84711	1
MSMEG_1351c	-	cyclopropane-fatty-acyl-phospholipid synthase 1	13	303.1	308.9	0.03	776	0.87512	1
MSMEG_1352c	-	hydrolase, alpha/beta fold family protein	8	63.6	89.5	0.49	278	0.8326	1
MSMEG_1353c	-	ABC1 family protein	10	1	1.2	0.19	449.5	1	1
MSMEG_1355	-	transcriptional regulator, TetR family protein	4	163.1	214.6	0.4	66	0.73844	1
MSMEG_1356c	-	hypothetical protein MSMEG_1356	6	63.9	51.5	-0.31	173	0.68382	1
MSMEG_1357c	-	hypothetical protein MSMEG_1357	7	106.3	115.5	0.12	211	0.80182	1
MSMEG_1358c	-	hypothetical protein MSMEG_1358	4	235	242.9	0.05	65.5	0.72697	1
MSMEG_1359	-	DeoR-family protein transcriptional regulator	14	54.9	56.3	0.03	877	0.96173	1
MSMEG_1360	-	endonuclease/exonuclease/phosphatase	8	98.8	97.2	-0.02	284.5	0.94328	1
MSMEG_1361	-	alpha-mannosidase	44	69.5	67.5	-0.04	8737	0.95984	1
MSMEG_1362	-	hypothetical protein MSMEG_1362	4	35.4	27.2	-0.38	74.5	0.87935	1
MSMEG_1363	-	glucokinase	4	71.4	105.1	0.56	73	0.97539	1
MSMEG_1364	rplJ	50S ribosomal protein L10	3	0	0	0	0	1	1
MSMEG_1365	rplL	50S ribosomal protein L7/L12	0	0	0	0	0	1	1
MSMEG_1366	-	ABC transporter, ATP-binding protein	11	119.5	123.6	0.05	547	0.97813	1
MSMEG_1367	rpoB	DNA-directed RNA polymerase subunit beta	32	0	0	0	0	1	1
MSMEG_1368	rpoC	DNA-directed RNA polymerase subunit beta'	46	0.3	1.7	2.41	9450	0.69213	1
MSMEG_1369c	-	LacI-family protein transcriptional regulator	8	79	68	-0.22	297	0.85562	1
MSMEG_1370	-	2-deoxy-scyllo-inosamine dehydrogenase	9	21.8	20.1	-0.11	352	0.81767	1
MSMEG_1371	-	hypothetical protein MSMEG_1371	6	60.1	41.1	-0.55	166.5	0.84545	1
MSMEG_1372	-	ABC transporter ATP-binding protein	2	134.2	101.8	-0.4	20.5	0.73246	1
MSMEG_1373	-	ribose/xylose/arabinose/galactoside ABC-type transport systems, permease components	11	36.3	32.4	-0.17	548	0.95708	1
MSMEG_1374	-	ribose ABC transporter, periplasmic binding protein	8	205.3	201	-0.03	282	0.90679	1
MSMEG_1375c	-	tagatose-1,6-bisphosphate aldolase GatY	3	0	0	0	0	1	1
MSMEG_1376	-	putative xylulose kinase	4	72.3	53.1	-0.44	77	0.78939	1
MSMEG_1377	-	DeoR-family protein transcriptional regulator	4	0	0	0	0	1	1
MSMEG_1378	-	1-phosphofructokinase	5	21.4	25.8	0.27	112	1	1
MSMEG_1379	-	hypothetical protein MSMEG_1379	12	89.2	116	0.38	637	0.8879	1
MSMEG_1380c	-	transcriptional regulator	4	22.9	42.3	0.89	61.5	0.53714	1
MSMEG_1381	-	MmpS5 protein	5	329.5	339.7	0.04	107	0.83469	1
MSMEG_1382	-	MmpL5 protein	29	107.7	102	-0.08	3780.5	0.99089	1
MSMEG_1383	-	endonuclease IV	4	302.5	305.5	0.01	72.5	1	1
MSMEG_1384c	-	hypothetical protein MSMEG_1384	6	338.6	311.8	-0.12	171.5	0.77533	1
MSMEG_1385	-	PAP2 superfamily protein	14	494.1	497.6	0.01	874.5	0.94982	1
MSMEG_1386	-	hypothetical protein MSMEG_1386	10	189.6	199.9	0.08	429.5	0.74819	1
MSMEG_1387	-	putative acyl-CoA dehydrogenase	17	305.9	327.4	0.1	1301	1	1
MSMEG_1388	-	enoyl-CoA hydratase	7	69.7	75.2	0.11	218.5	0.96226	1
MSMEG_1389	-	hypothetical protein MSMEG_1389	5	0	0	0	0	1	1
MSMEG_1390	-	enoyl-CoA hydratase	7	0	0	0	0	1	1
MSMEG_1391c	-	transcriptional regulator, LysR family protein	13	21.3	23.3	0.13	756.5	0.96587	1
MSMEG_1392	-	alcohol dehydrogenase, class IV	12	189.4	188	-0.01	649.5	0.98699	1
MSMEG_1393c	-	hypothetical protein MSMEG_1393	2	453.5	376.3	-0.27	21	0.68363	1
MSMEG_1394c	-	transmembrane protein	4	105.8	60.6	-0.8	78	0.72926	1
MSMEG_1395	-	putative lipoprotein	4	271.3	319.6	0.24	71	0.97668	1
MSMEG_1396	-	LprB protein	2	888.9	851.7	-0.06	18	0.93619	1
MSMEG_1397	-	transcriptional regulator, TetR family protein	8	97.2	88.3	-0.14	292.5	0.92834	1
MSMEG_1398	rpsL	30S ribosomal protein S12	4	0	0	0	0	1	1
MSMEG_1399	rpsG	30S ribosomal protein S7	5	0	0	0	0	1	1
MSMEG_1401	tuf	elongation factor Tu	10	0	0	0	0	1	1
MSMEG_1402	-	hypothetical protein MSMEG_1402	3	105.2	168.1	0.68	35.5	0.68567	1
MSMEG_1403	-	cutinase superfamily protein	8	198.2	187.2	-0.08	298.5	0.83223	1
MSMEG_1404	-	IS1096, tnpA protein	9	1804.3	1950.5	0.11	388	0.68977	1
MSMEG_1405c	-	IS1096, tnpR protein	10	736.6	561.9	-0.39	462	0.86477	1
MSMEG_1406	-	hypothetical protein MSMEG_1406	8	128.4	134.8	0.07	276	0.79805	1
MSMEG_1409	arcA	arginine deiminase	22	45.4	42	-0.11	2121	0.76674	1
MSMEG_1410	fabG	3-ketoacyl-(acyl-carrier-protein) reductase	10	67.7	66.7	-0.02	441	0.8858	1
MSMEG_1411c	-	universal stress protein family protein	9	59.1	48.8	-0.28	366	0.97471	1
MSMEG_1412c	-	amino acid permease	16	334.6	338.1	0.02	1121	0.81413	1
MSMEG_1413c	rocD	ornithine--oxo-acid transaminase	6	63.5	51.9	-0.29	163	0.98634	1
MSMEG_1414c	-	amidinotransferase	11	87.1	82	-0.09	549	0.95531	1
MSMEG_1415	-	AsnC-family protein transcriptional regulator	2	443.3	302	-0.55	30	0.06555	1
MSMEG_1416	-	pyridine nucleotide-disulphide oxidoreductase	10	22.1	38.9	0.82	457.5	0.90696	1
MSMEG_1417c	-	glyoxalase family protein	20	31	30.5	-0.03	1831	0.81572	1
MSMEG_1418c	-	RNA polymerase ECF-type sigma factor	10	111.4	101.8	-0.13	465	0.78742	1
MSMEG_1419	-	hypothetical protein MSMEG_1419	2	383.4	322.7	-0.25	22	0.57517	1
MSMEG_1420c	-	transcriptional regulatory protein	9	14.8	28.1	0.93	359.5	0.91481	1
MSMEG_1421	-	hypothetical protein MSMEG_1421	5	355.5	365.9	0.04	108	0.86386	1
MSMEG_1422	-	hypothetical protein MSMEG_1422	3	57.7	34.9	-0.72	43	0.83339	1
MSMEG_1423	-	radical SAM domain-containing protein	7	135	138.9	0.04	219.5	0.98955	1
MSMEG_1424	-	FMN-dependent dehydrogenase	9	58.9	78	0.4	373	0.86656	1
MSMEG_1425	-	creatininase subfamily protein	12	136	163.1	0.26	656	0.91622	1
MSMEG_1426	-	membrane sugar transferase	12	200.8	233	0.21	642.5	0.94097	1
MSMEG_1427c	-	transmembrane efflux protein	13	39.5	41.2	0.06	761	1	1
MSMEG_1428	-	glucose-methanol-choline oxidoreductase	12	53.8	68.3	0.34	631	0.82233	1
MSMEG_1429c	-	cytochrome P450-terp	15	35.8	39	0.12	984	0.76049	1
MSMEG_1430	-	transcriptional regulator, TetR family protein	5	140.4	129.4	-0.12	108	0.83786	1
MSMEG_1431c	-	cytochrome P450-terp	17	4283.1	4229.3	-0.02	1352	0.72918	1
MSMEG_1432	-	acetylcholinesterase	17	70.4	72.5	0.04	1313	0.92142	1
MSMEG_1433c	-	thioesterase	12	100.4	113	0.17	634	0.87088	1
MSMEG_1434	-	hypothetical protein MSMEG_1434	5	64.7	64	-0.02	112	1	1
MSMEG_1435	rpsJ	30S ribosomal protein S10	4	0	0	0	0	1	1
MSMEG_1436	rplC	50S ribosomal protein L3	7	0	0	0	0	1	1
MSMEG_1437	rplD	50S ribosomal protein L4	4	0	0	0	0	1	1
MSMEG_1438	rplW	50S ribosomal protein L23	4	0	0	0	0	1	1
MSMEG_1439	rplB	50S ribosomal protein L2	11	0	0	0	0	1	1
MSMEG_1440	rpsS	30S ribosomal protein S19	1	0	0	0	0	1	1
MSMEG_1441	-	50S ribosomal protein L22	3	0	0	0	0	1	1
MSMEG_1442	rpsC	30S ribosomal protein S3	12	0	0	0	0	1	1
MSMEG_1443	rplP	50S ribosomal protein L16	6	0	0	0	0	1	1
MSMEG_1444	rpmC	50S ribosomal protein L29	3	0	0	0	0	1	1
MSMEG_1445	-	30S ribosomal protein S17	7	0	0	0	0	1	1
MSMEG_1446	-	NTP pyrophosphohydrolase	5	2928.6	2676.6	-0.13	113.5	0.98132	1
MSMEG_1447c	-	transcriptional regulator, MerR family protein	4	222.6	81	-1.46	76.5	0.76145	1
MSMEG_1448c	-	integral membrane transporter	11	23.2	40.2	0.79	534	0.8675	1
MSMEG_1450	-	hypothetical protein MSMEG_1450	0	0	0	0	0	1	1
MSMEG_1451	-	arylsulfatase	34	175.9	178.9	0.02	5115	0.82807	1
MSMEG_1452	-	sulfatase-modifying factor 1	10	7.8	0.8	-3.22	483	0.35605	1
MSMEG_1453c	-	citrate transporter	10	159.6	174	0.12	415.5	0.60849	1
MSMEG_1454	-	hypothetical protein MSMEG_1454	1	0	0	0	0	1	1
MSMEG_1455	-	putative multidrug resistance protein	10	24.8	19.6	-0.34	480.5	0.52552	1
MSMEG_1456c	-	hypothetical protein MSMEG_1456	10	58.6	69.5	0.25	449.5	1	1
MSMEG_1457	-	hypothetical protein MSMEG_1457	2	57.2	61.1	0.09	14	0.57383	1
MSMEG_1458	-	tena/thi-4 family protein	15	191.3	188.8	-0.02	999.5	0.91525	1
MSMEG_1459	-	Rieske (2Fe-2S) domain-containing protein	5	11.9	9	-0.41	119	0.7015	1
MSMEG_1460	-	pyridine nucleotide-disulphide oxidoreductase	7	87.9	95.1	0.11	219.5	0.98741	1
MSMEG_1461	-	5-oxovalerate dehydrogenase	9	31	40.3	0.38	360	0.93426	1
MSMEG_1462	-	ferredoxin	4	54.3	57.5	0.08	70.5	0.9395	1
MSMEG_1463	-	gamma-glutamyltranspeptidase	11	93.1	100.7	0.11	543.5	0.99406	1
MSMEG_1464	-	translation initiation inhibitor	5	151.8	166.9	0.14	98.5	0.57402	1
MSMEG_1465	rplN	ribosomal protein L14	2	0	0	0	0	1	1
MSMEG_1466	rplX	50S ribosomal protein L24	2	0	0	0	0	1	1
MSMEG_1467	rplE	50S ribosomal protein L5	5	0	0	0	0	1	1
MSMEG_1468	rpsN	ribosomal protein S14p/S29e	2	0	0	0	0	1	1
MSMEG_1469	rpsH	30S ribosomal protein S8	6	0	0	0	0	1	1
MSMEG_1470	rplF	50S ribosomal protein L6	7	0	0	0	0	1	1
MSMEG_1471	rplR	50S ribosomal protein L18	2	0	0	0	0	1	1
MSMEG_1472	rpsE	30S ribosomal protein S5	5	0	0	0	0	1	1
MSMEG_1473	rpmD	ribosomal protein L30	3	0	0	0	0	1	1
MSMEG_1474	rplO	50S ribosomal protein L15	3	0	0	0	0	1	1
MSMEG_1475c	-	hypothetical protein MSMEG_1475	8	3713.1	3467.1	-0.1	299	0.8269	1
MSMEG_1476	sppA	signal peptide peptidase SppA, 67K type	14	80.5	77.2	-0.06	883.5	0.99005	1
MSMEG_1477	-	major facilitator superfamily protein	26	175.4	183.4	0.06	2903	0.60259	1
MSMEG_1478	-	transporter, LysE family protein	8	117.8	117.9	0	286.5	0.98108	1
MSMEG_1479c	-	methyltransferase, putative, family protein	9	96.6	80.9	-0.26	369	0.93426	1
MSMEG_1480c	-	methyltransferase	10	64.8	51.6	-0.33	462.5	0.82676	1
MSMEG_1481c	-	methyltransferase	9	176	160.1	-0.14	380	0.78308	1
MSMEG_1482c	-	methyltransferase	5	168	170.9	0.02	114.5	0.94767	1
MSMEG_1483	secY	preprotein translocase subunit SecY	25	87.3	104.8	0.26	2773	0.74568	1
MSMEG_1484	adk	adenylate kinase	7	0	0	0	0	1	1
MSMEG_1485	map	methionine aminopeptidase	8	947.8	844.2	-0.17	291.5	0.95063	1
MSMEG_1486	-	RNA polymerase sigma factor SigL	10	224.4	218.4	-0.04	454.5	0.94959	1
MSMEG_1487	-	hypothetical protein MSMEG_1487	5	67.8	71.3	0.07	115	0.93168	1
MSMEG_1488	-	acetolactate synthase	18	49.6	65.2	0.39	1498	0.67754	1
MSMEG_1489	-	hypothetical protein MSMEG_1489	11	72.5	71.2	-0.03	534	0.88764	1
MSMEG_1490	-	3-oxoacyl-ACP synthase III	9	178.3	160.1	-0.16	375	0.85627	1
MSMEG_1491	-	histidinol-phosphate aminotransferase 2	13	120.5	131.7	0.13	730	0.73874	1
MSMEG_1492	-	transcriptional regulator, MarR family protein	1	0	0	0	0	1	1
MSMEG_1493c	-	sensor histidine kinase	6	135.8	141.8	0.06	163.5	0.96113	1
MSMEG_1494c	-	transcriptional regulatory protein DegU	6	259.6	214.7	-0.27	174	0.71499	1
MSMEG_1495	-	HAD-superfamily protein hydrolase subfamily protein IA, variant 3, putative	5	295	328.3	0.15	116.5	0.88411	1
MSMEG_1496c	mmsB	3-hydroxyisobutyrate dehydrogenase	3	0	0	0	0	1	1
MSMEG_1497c	-	acyl-CoA dehydrogenase family protein member 8	15	148.8	160.2	0.11	996	0.89207	1
MSMEG_1498c	mmsA	methylmalonate-semialdehyde dehydrogenase	17	218.2	224.8	0.04	1297.5	0.98437	1
MSMEG_1499	-	oxygenase	9	90.4	111.1	0.3	351	0.82011	1
MSMEG_1500	-	TetR family protein transcriptional regulatory protein	10	172.6	193	0.16	430	0.75794	1
MSMEG_1501	-	methyltransferase, putative, family protein	16	127.8	111.3	-0.2	1174	0.86121	1
MSMEG_1502	-	ABC transporter, ATP-binding protein	12	63.5	66.7	0.07	655.5	0.92983	1
MSMEG_1503	-	antibiotic ABC transporter transmembrane protein	10	77.8	49.8	-0.64	464.5	0.79846	1
MSMEG_1504	-	antibiotic ABC transporter transmembrane protein	11	71.9	97.7	0.44	538	0.92186	1
MSMEG_1505c	-	integral membrane protein	4	13.5	2.1	-2.7	74.5	0.87935	1
MSMEG_1506c	-	transcriptional regulator, TetR family protein	12	486.5	518	0.09	662	0.8701	1
MSMEG_1507	-	D-aminopeptidase	7	35.9	32.2	-0.16	218	0.95552	1
MSMEG_1508	-	amino acid permease-associated region	15	29.1	27.1	-0.1	1004	0.93799	1
MSMEG_1509c	-	TetR-family protein transcriptional regulator	7	75	62.1	-0.27	206	0.68681	1
MSMEG_1510c	-	dTDP-4-dehydrorhamnose 3,5-epimerase	5	0	0	0	0	1	1
MSMEG_1511	-	putative oxidoreductase	2	50.1	50.9	0.02	17.5	1	1
MSMEG_1512c	rfbB	dTDP-glucose 4,6-dehydratase	14	0	0	0	0	1	1
MSMEG_1513c	-	hypothetical protein MSMEG_1513	9	243.8	236	-0.05	368.5	0.94878	1
MSMEG_1514c	-	hypothetical protein MSMEG_1514	11	121.6	106.6	-0.19	580.5	0.64554	1
MSMEG_1515c	-	two-component sensor histidine kinase	14	136.8	154.3	0.17	822.5	0.58901	1
MSMEG_1516c	-	thioredoxin reductase	20	388.5	415.1	0.1	1707	0.62369	1
MSMEG_1517c	-	SPFH domain-containing protein/band 7 family protein	7	219.2	163.3	-0.42	235	0.72379	1
MSMEG_1518c	-	hypothetical protein MSMEG_1518	6	653.7	737.2	0.17	163	0.98707	1
MSMEG_1519	infA	translation initiation factor IF-1	4	0	0	0	0	1	1
MSMEG_1520	rpmJ	50S ribosomal protein L36	0	0	0	0	0	1	1
MSMEG_1521	rpsM	30S ribosomal protein S13	5	0	0	0	0	1	1
MSMEG_1522	rpsK	30S ribosomal protein S11	1	0	0	0	0	1	1
MSMEG_1523	rpsD	30S ribosomal protein S4	11	0	0	0	0	1	1
MSMEG_1524	rpoA	DNA-directed RNA polymerase subunit alpha	10	0	0	0	0	1	1
MSMEG_1525	-	50S ribosomal protein L17	3	0	0	0	0	1	1
MSMEG_1526c	-	cutinase	6	412.1	409	-0.01	167	0.88406	1
MSMEG_1527	truA	tRNA pseudouridine synthase A	10	10.5	14.1	0.42	434	0.77313	1
MSMEG_1528c	-	cutinase	10	192.9	185.7	-0.06	446	0.95716	1
MSMEG_1529c	-	serine esterase, cutinase family protein	6	132.6	106.1	-0.32	192	0.33901	1
MSMEG_1530c	-	integral membrane protein	10	197.9	194.8	-0.02	450	0.99405	1
MSMEG_1531	-	hypothetical protein MSMEG_1531	3	269.6	326.6	0.28	38	0.83339	1
MSMEG_1532c	-	antibiotic biosynthesis monooxygenase	3	75.1	62.1	-0.28	42	0.91623	1
MSMEG_1533c	-	subtilase family protein	9	47.8	65.9	0.46	357	0.88523	1
MSMEG_1534	-	hypothetical protein MSMEG_1534	10	14.8	16.4	0.15	449.5	1	1
MSMEG_1535c	-	hypothetical protein MSMEG_1535	12	43.3	47	0.12	661	0.82208	1
MSMEG_1536	-	ftsk/SpoIIIE family protein	29	19.6	20.5	0.07	3693.5	0.71668	1
MSMEG_1537	-	hypothetical protein MSMEG_1537	8	19.1	11.8	-0.7	292	0.92439	1
MSMEG_1538	-	hypothetical protein MSMEG_1538	0	0	0	0	0	1	1
MSMEG_1539	-	hypothetical protein MSMEG_1539	3	109.9	110	0	40	1	1
MSMEG_1540c	-	ATP-dependent RNA helicase	4	206.3	275.7	0.42	68	0.8379	1
MSMEG_1541	-	hypothetical protein MSMEG_1541	2	144.9	125.2	-0.21	19.5	0.86428	1
MSMEG_1542	-	transcriptional regulator	6	191.4	221.3	0.21	159	0.93077	1
MSMEG_1543	-	eptc-inducible aldehyde dehydrogenase	20	237.3	289.2	0.29	1736.5	0.72871	1
MSMEG_1544	-	PduO protein	1	0	0	0	0	1	1
MSMEG_1545c	-	hypothetical protein MSMEG_1545	5	64.9	57	-0.19	118.5	0.80982	1
MSMEG_1546	-	coenzyme B12-dependent glycerol dehydrogenase small subunit	4	46.3	37.5	-0.3	78	0.69261	1
MSMEG_1547	-	glycerol dehydratase large subunit	11	37.5	42.6	0.18	530	0.82228	1
MSMEG_1548	-	propanediol utilization: dehydratase, medium subunit	3	0	0	0	0	1	1
MSMEG_1550	-	PduH protein	2	0	0	0	0	1	1
MSMEG_1551c	-	hypothetical protein MSMEG_1551	2	18.6	14.5	-0.35	20	0.78882	1
MSMEG_1552	eat	ethanolamine permease	18	229.6	230.9	0.01	1489	0.85018	1
MSMEG_1553	eutB	ethanolamine ammonia-lyase, large subunit	12	123.2	115.3	-0.1	634	0.86118	1
MSMEG_1554	eutC	ethanolamine ammonia-lyase small subunit	4	63.7	50.9	-0.32	74.5	0.87935	1
MSMEG_1556	rplM	50S ribosomal protein L13	6	0	0	0	0	1	1
MSMEG_1557	rpsI	ribosomal protein S9	5	0	0	0	0	1	1
MSMEG_1558	-	hypothetical protein MSMEG_1558	0	0	0	0	0	1	1
MSMEG_1559	glmM	phosphoglucosamine mutase	7	0	0	0	0	1	1
MSMEG_1560	-	hypothetical protein MSMEG_1560	4	6.2	9	0.53	70.5	0.9395	1
MSMEG_1561c	-	LysR-family protein trancsriptional regulator	8	30.5	24.4	-0.33	299	0.75054	1
MSMEG_1563	-	short-chain dehydrogenase/reductase SDR	11	52	47.1	-0.14	532	0.84132	1
MSMEG_1564c	-	lignostilbene-alpha,beta-dioxygenase	25	68.7	66.3	-0.05	2839	0.90093	1
MSMEG_1565	-	transcriptional regulator, TetR family protein	5	27.9	21.2	-0.39	115	0.9055	1
MSMEG_1566c	-	oxidoreductase	20	56.6	60.3	0.09	1791.5	0.95038	1
MSMEG_1567c	-	hypothetical protein MSMEG_1567	6	18.3	22.5	0.3	145	0.58094	1
MSMEG_1568	glmS	D-fructose-6-phosphate amidotransferase	22	0	0	0	0	1	1
MSMEG_1569c	-	hypothetical protein MSMEG_1569	2	38.3	26.8	-0.51	17.5	1	1
MSMEG_1570	-	carboxylesterase	9	108	114	0.08	361.5	0.96211	1
MSMEG_1571c	-	integral membrane protein	10	174.7	179.9	0.04	442	0.90035	1
MSMEG_1572	-	transcriptional regulator, GntR family protein	15	16.5	15.1	-0.14	1012.5	0.99348	1
MSMEG_1573	-	carbohydrate kinase family protein	12	232.8	216.6	-0.1	659.5	0.89766	1
MSMEG_1574	-	glutamate decarboxylase	15	209	222.4	0.09	1001	0.9244	1
MSMEG_1575	alr	alanine racemase	12	0	0	0	0	1	1
MSMEG_1576	-	alpha/beta hydrolase fold	9	38	38.2	0.01	362	0.96899	1
MSMEG_1577	-	hypothetical protein MSMEG_1577	2	114.4	85.5	-0.42	20	0.81018	1
MSMEG_1578	-	peptidase M22, glycoprotease	7	39.8	43.6	0.13	220.5	0.98955	1
MSMEG_1579	rimI	ribosomal-protein-alanine acetyltransferase	10	71.6	64.3	-0.15	458	0.89311	1
MSMEG_1580	-	O-sialoglycoprotein endopeptidase	8	21.1	26.1	0.31	249.5	0.36751	1
MSMEG_1581	-	hypothetical protein MSMEG_1581	5	118.4	76.2	-0.64	125	0.60695	1
MSMEG_1582	groES	co-chaperonin GroES	4	0	0	0	0	1	1
MSMEG_1583	groEL	chaperonin GroEL	4	171.6	196.4	0.19	62.5	0.60047	1
MSMEG_1584	-	hypothetical protein MSMEG_1584	9	91.6	100.9	0.14	352	0.81555	1
MSMEG_1585	-	cupin domain-containing protein	8	159.2	142.1	-0.16	263	0.60372	1
MSMEG_1586c	-	beta-lactamase	11	162.3	175.9	0.12	518.5	0.73118	1
MSMEG_1587c	-	alpha/beta hydrolase fold	8	77.7	73.5	-0.08	291	0.95705	1
MSMEG_1588	-	hypothetical protein MSMEG_1588	4	97.1	74.9	-0.37	76	0.82899	1
MSMEG_1589c	-	hypothetical protein MSMEG_1589	4	24.8	26.8	0.11	73.5	0.9395	1
MSMEG_1590	-	hypothetical protein MSMEG_1590	1	0	0	0	0	1	1
MSMEG_1591	-	TnpC protein	18	166.3	167.7	0.01	1463	0.97752	1
MSMEG_1592	-	hypothetical protein MSMEG_1592	11	129.6	146.1	0.17	510	0.65271	1
MSMEG_1593c	-	hypothetical protein MSMEG_1593	2	0	0	0	0	1	1
MSMEG_1594	-	enoyl-CoA hydratase	4	110.3	107.3	-0.04	72	0.97539	1
MSMEG_1595c	-	putative oxidoreductase	4	223.8	194.1	-0.21	72.5	1	1
MSMEG_1596	-	transcriptional regulator	5	113	92.8	-0.28	117.5	0.83309	1
MSMEG_1597c	-	transcription factor WhiB	2	48.7	44.3	-0.13	18.5	1	1
MSMEG_1598	-	hypothetical protein MSMEG_1598	12	67	90.4	0.43	615	0.67376	1
MSMEG_1599	-	RNA polymerase sigma factor SigD	5	195.2	202.7	0.05	112	1	1
MSMEG_1600	-	hypothetical protein MSMEG_1600	8	92.2	95.9	0.06	292	0.93949	1
MSMEG_1601c	-	hypothetical protein MSMEG_1601	9	70.1	82.4	0.23	362.5	0.97726	1
MSMEG_1602	guaB	inositol-5-monophosphate dehydrogenase	11	302.4	269.3	-0.17	545	1	1
MSMEG_1603	-	inositol-5-monophosphate dehydrogenase	11	22	31.9	0.54	535.5	0.89338	1
MSMEG_1604	-	FAD dependent oxidoreductase	19	170.4	166.2	-0.04	1627.5	0.98804	1
MSMEG_1605	phoU	phosphate transport system regulatory protein PhoU	4	65.9	77.7	0.24	66	0.72926	1
MSMEG_1606	-	benzoylformate decarboxylase	20	26.4	35.8	0.44	1739	0.68649	1
MSMEG_1607	-	putative tautomerase	3	32.8	21.4	-0.62	40	1	1
MSMEG_1608c	-	glycosyl transferase	31	158	136.3	-0.21	4315	0.9768	1
MSMEG_1610	guaA	bifunctional GMP synthase/glutamine amidotransferase protein	11	0	0	0	0	1	1
MSMEG_1611	-	transcriptional regulator, TetR family protein, putative	5	108.8	109.1	0	115.5	0.9068	1
MSMEG_1612	-	extracellular solute-binding protein, family protein 3	11	35.5	41.8	0.24	554	0.89206	1
MSMEG_1613	-	ABC polar amino acid transporter, inner membrane subunit	6	126.7	71.6	-0.82	171.5	0.76084	1
MSMEG_1614	-	glutamine transport ATP-binding protein GlnQ	1	42.7	84.9	0.99	1	0.19043	1
MSMEG_1615	ggt	gamma-glutamyltranspeptidase	7	63.8	68.2	0.1	215	0.8891	1
MSMEG_1617c	-	kumamolisin	17	66.8	72.7	0.12	1306	0.96721	1
MSMEG_1618c	-	hypothetical protein MSMEG_1618	1	0	0	0	0	1	1
MSMEG_1619	-	hypothetical protein MSMEG_1619	2	0	0	0	0	1	1
MSMEG_1620	-	hypothetical protein MSMEG_1620	4	0.6	0	-0.69	78	0.35932	1
MSMEG_1621c	-	pyrimidine-specific ribonucleoside hydrolase RihA	5	29	41.1	0.51	103	0.69966	1
MSMEG_1622	-	putative DNA repair polymerase	9	42.6	47.9	0.17	365	1	1
MSMEG_1623c	-	short chain dehydrogenase	24	122.2	122.2	0	2529	0.79229	1
MSMEG_1624	-	universal stress protein family protein	4	0	0	0	0	1	1
MSMEG_1625	-	amino acid transporter, putative	21	107.3	124.3	0.21	1922	0.7464	1
MSMEG_1626c	-	putative DNA-binding protein	8	24.9	31.4	0.33	261	0.536	1
MSMEG_1627c	-	hypothetical protein MSMEG_1627	0	0	0	0	0	1	1
MSMEG_1628	-	oxidoreductase, short chain dehydrogenase/reductase family protein	9	0	0.3	0.4	351	0.33557	1
MSMEG_1629c	-	hypothetical protein MSMEG_1629	9	55.3	53.9	-0.04	380	0.78455	1
MSMEG_1630c	-	2,5-dichloro-2,5-cyclohexadiene-1,4-diol dehydrogenase	6	601.8	610.3	0.02	173.5	0.72723	1
MSMEG_1631	-	DNA-binding protein	7	105.8	125.5	0.25	219	0.97893	1
MSMEG_1632c	-	hypothetical protein MSMEG_1632	3	0	0	0	0	1	1
MSMEG_1633	dnaE2	error-prone DNA polymerase	28	32	22.2	-0.53	3501	0.91876	1
MSMEG_1634	-	forkhead-associated protein	3	125.6	164.1	0.39	32	0.46676	1
MSMEG_1635	-	nitroreductase family protein	5	209.6	199.2	-0.07	113.5	0.98314	1
MSMEG_1636c	-	RNA methyltransferase, TrmH family protein, group 2	7	338.6	323	-0.07	223.5	0.93713	1
MSMEG_1637	-	periplasmic sensor signal transduction histidine kinase	17	355.7	370.7	0.06	1272	0.84305	1
MSMEG_1638	-	roadblock/LC7 domain-contain protein	3	0	0	0	0	1	1
MSMEG_1639	-	hypothetical protein MSMEG_1639	9	180.4	183.8	0.03	383	0.75494	1
MSMEG_1640	-	ATP/GTP-binding protein	5	360.6	298	-0.27	110	0.93168	1
MSMEG_1641	-	hypothetical protein MSMEG_1641	6	0.9	2.7	1.64	152	0.53071	1
MSMEG_1642c	-	ABC transporter, ATP-binding protein	26	58.3	63	0.11	3061	0.93731	1
MSMEG_1643	-	hypothetical protein MSMEG_1643	22	660.5	641.1	-0.04	2155.5	0.91216	1
MSMEG_1644c	-	hypothetical protein MSMEG_1644	11	207	260.6	0.33	504.5	0.60742	1
MSMEG_1645c	-	NADH:flavin oxidoreductase/NADH oxidase	11	206.4	170.7	-0.27	558.5	0.85568	1
MSMEG_1646c	-	ribosomal RNA adenine dimethylase family protein	9	74.2	80.5	0.12	373	0.88034	1
MSMEG_1647	-	tetrahydrofolate dehydrogenase/cyclohydrolase FolD	3	0	0	0	0	1	1
MSMEG_1648	-	putative transcriptional regulator	9	115.8	129.6	0.16	351	0.81385	1
MSMEG_1649	-	FAD dependent oxidoreductase	15	107.5	99.6	-0.11	1018.5	0.95864	1
MSMEG_1650c	-	methyltransferase type 11	5	412.8	408.8	-0.01	112.5	0.98132	1
MSMEG_1651c	metX	homoserine O-acetyltransferase	10	0	0	0	0	1	1
MSMEG_1652c	-	O-acetylhomoserine aminocarboxypropyltransferase	15	27	33.2	0.3	952.5	0.60215	1
MSMEG_1653c	-	hypothetical protein MSMEG_1653	1	0	0	0	0	1	1
MSMEG_1654	-	isocitrate dehydrogenase, NADP-dependent	26	1.6	3.4	1.11	2910	0.43205	1
MSMEG_1655c	-	hydrolase, alpha/beta fold family protein, putative	7	223.6	228	0.03	211	0.81929	1
MSMEG_1656	xth	exodeoxyribonuclease III	4	139	144.6	0.06	72	0.97539	1
MSMEG_1657	trpS	tryptophanyl-tRNA synthetase	12	0	0	0	0	1	1
MSMEG_1658	-	ribonuclease, putative	8	156.9	132.6	-0.24	312.5	0.61116	1
MSMEG_1659c	-	multidrug resistance protein, SMR family protein	2	0	0	0	0	1	1
MSMEG_1660	-	oxidoreductase, 2-nitropropane dioxygenase family protein	3	50.7	44.8	-0.18	42	0.91623	1
MSMEG_1661c	-	D-alanyl-D-alanine carboxypeptidase	14	33.6	38	0.18	919	0.69374	1
MSMEG_1662c	-	hypothetical protein MSMEG_1662	18	42.9	38.1	-0.17	1455	0.98667	1
MSMEG_1663c	-	transcriptional regulator, AsnC family protein	8	5.4	3.7	-0.53	276	0.65473	1
MSMEG_1664c	-	hypothetical protein MSMEG_1664	6	8.9	14.4	0.7	159.5	0.92236	1
MSMEG_1665	-	gamma-aminobutyraldehyde dehydrogenase	13	162.1	171.4	0.08	717	0.66666	1
MSMEG_1666	-	RNA polymerase sigma factor SigJ	8	250.3	234.6	-0.09	282	0.90679	1
MSMEG_1668	-	pyridoxamine 5'-phosphate oxidase family protein	3	496.7	554.8	0.16	35	0.65884	1
MSMEG_1669c	sdhB	succinate dehydrogenase iron-sulfur subunit	9	0	0	0	0	1	1
MSMEG_1670c	sdhA	succinate dehydrogenase flavoprotein subunit	26	0	0	0	0	1	1
MSMEG_1671c	-	succinate dehydrogenase hydrophobic membrane anchor protein SdhD	8	12.2	14.3	0.23	287.5	1	1
MSMEG_1672c	sdhC	succinate dehydrogenase, cytochrome b556 subunit	9	0	0	0	0	1	1
MSMEG_1673	cdd	cytidine deaminase	4	120.7	129	0.1	70.5	0.9395	1
MSMEG_1674c	-	hypothetical protein MSMEG_1674	2	0	0	0	0	1	1
MSMEG_1675	deoA	thymidine phosphorylase	4	443	525.4	0.25	61	0.54428	1
MSMEG_1676	add	adenosine deaminase	9	134.1	115.2	-0.22	417	0.35762	1
MSMEG_1677c	aspA	aspartate ammonia-lyase	16	182.5	157.4	-0.21	1215	0.62442	1
MSMEG_1678	-	transcriptional regulator, LysR family protein	16	217.9	214.6	-0.02	1170	0.87966	1
MSMEG_1679c	-	AmiB	15	45.6	44.1	-0.05	1032	0.84145	1
MSMEG_1680c	-	hypothetical protein MSMEG_1680	5	8.2	14.6	0.83	100	0.56453	1
MSMEG_1681c	-	endoribonuclease L-PSP superfamily protein	6	139.7	144.2	0.05	155	0.82953	1
MSMEG_1682c	-	flavin-containing monooxygenase FMO	18	42.2	52.9	0.33	1434	0.85803	1
MSMEG_1683c	-	cytosine/purine/uracil/thiamine/allantoin permease family protein	20	102.6	131	0.35	1822	0.89673	1
MSMEG_1684c	-	hypothetical protein MSMEG_1684	10	127.7	109.7	-0.22	451.5	0.98739	1
MSMEG_1685c	-	hypothetical protein MSMEG_1685	0	0	0	0	0	1	1
MSMEG_1686c	-	NPL/P60-family protein secreted protein	5	38.8	45.2	0.22	110.5	0.94399	1
MSMEG_1687c	-	hypothetical protein MSMEG_1687	2	0	0	0	0	1	1
MSMEG_1688c	-	cupin domain-containing protein	2	0	0	0	0	1	1
MSMEG_1689c	-	3-oxoacyl-	5	0	0	0	0	1	1
MSMEG_1690c	-	putative ECF sigma factor RpoE1	5	3461.8	3362	-0.04	120	0.76414	1
MSMEG_1691c	-	transcriptional regulatory protein	17	902	917.3	0.02	1305	0.97519	1
MSMEG_1692	-	ECF-family protein RNA polymerase sigma factor	7	20.8	15	-0.47	222	0.96703	1
MSMEG_1693c	-	succinate dehydrogenase	18	65.8	64.8	-0.02	1440	0.89709	1
MSMEG_1694	upp	uracil phosphoribosyltransferase	4	30.1	31.9	0.08	68	0.83557	1
MSMEG_1695c	-	phosphoglucomutase/phosphomannomutase	8	3.9	4.6	0.23	277	0.72434	1
MSMEG_1696c	-	regulatory protein, MarR	2	67.1	30.7	-1.13	21.5	0.6081	1
MSMEG_1697c	-	hypothetical protein MSMEG_1697	7	93.5	90.7	-0.04	227	0.86888	1
MSMEG_1698	-	putative ammonia monooxygenase superfamily protein	8	18.8	17.1	-0.14	310	0.53231	1
MSMEG_1699c	-	pentachlorophenol 4-monooxygenase	9	6.3	3.4	-0.91	384	0.6404	1
MSMEG_1700	-	TetR-family protein transcriptional regulator	4	17.9	37.1	1.05	52.5	0.24109	1
MSMEG_1701c	-	purine nucleoside phosphorylase	10	68.1	68.7	0.01	445	0.94011	1
MSMEG_1702	-	amidohydrolase	7	154.8	144.4	-0.1	218	0.95552	1
MSMEG_1703	-	amidohydrolase	5	227.7	169.8	-0.42	124	0.63728	1
MSMEG_1704	-	ABC transporter	17	32.6	33.2	0.02	1301	1	1
MSMEG_1705	-	D-xylose transport ATP-binding protein XylG	14	5.4	6.1	0.18	829	0.45555	1
MSMEG_1706	-	xylose transport system permease protein XylH	12	20.3	29.2	0.52	603.5	0.57272	1
MSMEG_1707c	-	phosphatase YfbT	1	0	0	0	0	1	1
MSMEG_1708c	-	ribose operon repressor, putative	7	0	0	0	0	1	1
MSMEG_1709c	-	inner membrane ABC transporter permease protein YjfF	14	124.5	131.4	0.08	876	0.95649	1
MSMEG_1710c	-	ribose transport system permease protein RbsC	9	58.3	29	-1.01	370.5	0.89597	1
MSMEG_1711c	-	ATP binding protein of ABC transporter	9	34	35.8	0.07	380.5	0.75692	1
MSMEG_1712c	-	ABC transporter periplasmic-binding protein YtfQ	5	67.8	52.3	-0.37	114	0.95267	1
MSMEG_1713	araB	ribulokinase	17	28.4	22.4	-0.34	1288	0.90586	1
MSMEG_1714	-	L-ribulose-5-phosphate 4-epimerase	8	40.5	48.9	0.27	281	0.8601	1
MSMEG_1715	araA	L-arabinose isomerase	11	6.3	10.8	0.79	542	0.95898	1
MSMEG_1716	-	IS3 family protein element, transposase orfA	3	0	0	0	0	1	1
MSMEG_1717c	-	ISMsm8, transposase	20	51.6	44.6	-0.21	1832.5	0.84777	1
MSMEG_1720	-	IS1137, transposase orfA	1	0	0	0	0	1	1
MSMEG_1721	-	IS1137, transposase orfB	24	89.9	88.1	-0.03	2590.5	0.99633	1
MSMEG_1722c	-	hypothetical protein MSMEG_1722	9	107.5	107.2	0	374	0.85007	1
MSMEG_1723	-	hypothetical protein MSMEG_1723	5	80.3	45.1	-0.83	121	0.65448	1
MSMEG_1724c	-	hypothetical protein MSMEG_1724	6	145.2	132.6	-0.13	162.5	1	1
MSMEG_1725	-	putative transposase	6	227.1	235.9	0.05	163.5	0.9747	1
MSMEG_1726	-	transposase	16	275	283.6	0.04	1101	0.71129	1
MSMEG_1728	-	ISMsm1, transposase orfA	3	164.8	169.2	0.04	41	1	1
MSMEG_1730	-	ISMsm1, transposase orfB	17	112.5	116.7	0.05	1332	0.83374	1
MSMEG_1731c	-	IS6120, transposase	19	177.9	182.3	0.04	1644	0.9132	1
MSMEG_1732	-	transposase IS116/IS110/IS902	28	154.3	153.9	0	3510.5	0.95325	1
MSMEG_1733	-	hypothetical protein MSMEG_1733	6	78.3	71	-0.14	165	0.92489	1
MSMEG_1734c	-	hypothetical protein MSMEG_1734	6	111.1	103	-0.11	155	0.81099	1
MSMEG_1735	-	flavoprotein disulfide reductase	11	205.3	201.3	-0.03	543.5	0.99476	1
MSMEG_1736	-	glycerol-3-phosphate dehydrogenase 2	20	88.1	84.3	-0.06	1845	0.80139	1
MSMEG_1737	-	RNA pseudouridine synthase family protein	9	416.7	400	-0.06	359	0.92862	1
MSMEG_1738c	-	transmembrane protein	4	476.3	438	-0.12	71.5	1	1
MSMEG_1739c	-	enoyl-CoA hydratase/isomerase family protein	8	139.6	142.6	0.03	287	0.98918	1
MSMEG_1740	-	dehydrogenase/reductase SDR family protein member 4	8	159	147.9	-0.1	294	0.90724	1
MSMEG_1741c	-	TetR-family protein transcriptional regulator	7	60.1	47.3	-0.35	225	0.91117	1
MSMEG_1742	-	oxidoreductase	12	135.2	142.9	0.08	644	0.96252	1
MSMEG_1743	-	Fatty acid desaturase	19	201.8	197.2	-0.03	1638	0.93673	1
MSMEG_1744c	-	hypothetical protein MSMEG_1744	12	98.6	113.5	0.2	643	0.95653	1
MSMEG_1745c	-	transcriptional regulator	10	25	34.3	0.46	459	0.83969	1
MSMEG_1746	-	6-hydroxy-D-nicotine oxidase	11	97.7	79.7	-0.29	547	0.97746	1
MSMEG_1747	-	RNA polymerase sigma-70 factor	10	16	23.3	0.54	446	0.94096	1
MSMEG_1748	-	hypothetical protein MSMEG_1748	6	26	17.3	-0.59	163.5	0.96113	1
MSMEG_1749c	-	putative monooxygenase	10	591.1	603.6	0.03	458	0.90035	1
MSMEG_1750	-	hypothetical protein MSMEG_1750	4	17	12.1	-0.5	73.5	0.9395	1
MSMEG_1751c	-	norsolorinic acid reductase	19	89.7	93.6	0.06	1610	0.92995	1
MSMEG_1752c	-	hypothetical protein MSMEG_1752	1	102.4	62.6	-0.71	7	0.38273	1
MSMEG_1753	mtnN	MTA/SAH nucleosidase	4	67.6	116	0.78	71	0.97352	1
MSMEG_1754	-	hypothetical protein MSMEG_1754	4	292.1	322.4	0.14	65	0.70222	1
MSMEG_1755c	-	anti-sigm factor, ChrR	5	105.6	104.1	-0.02	114.5	0.944	1
MSMEG_1756c	-	endonuclease VIII and DNA n-glycosylase with an AP lyase activity	6	97.6	130.7	0.42	168	0.8357	1
MSMEG_1757c	-	DEAD/DEAH box helicase	30	109	119.8	0.14	3973	0.79309	1
MSMEG_1758c	-	hypothetical protein MSMEG_1758	0	0	0	0	0	1	1
MSMEG_1759	-	hypothetical protein MSMEG_1759	7	561.3	564	0.01	210	0.79908	1
MSMEG_1760c	-	short-chain dehydrogenase/reductase SDR	10	153.2	148.5	-0.05	448	0.98192	1
MSMEG_1761	-	integral membrane protein	21	262.4	251	-0.06	2009	0.90548	1
MSMEG_1762c	-	piperideine-6-carboxylic acid dehydrogenase	8	132.7	141	0.09	279	0.85872	1
MSMEG_1763	-	leucine-responsive regulatory protein	6	329.8	356.8	0.11	150.5	0.72721	1
MSMEG_1764	-	L-lysine aminotransferase	5	382.8	444.5	0.22	106	0.79704	1
MSMEG_1765c	-	restriction endonuclease family protein	2	210.4	204.2	-0.04	19.5	0.86428	1
MSMEG_1766	-	hypothetical protein MSMEG_1766	1	0	0	0	0	1	1
MSMEG_1767	-	hypothetical protein MSMEG_1767	3	139.5	102.7	-0.44	47.5	0.5588	1
MSMEG_1768	-	hypothetical protein MSMEG_1768	7	66.4	51.8	-0.36	230.5	0.80337	1
MSMEG_1769	-	UsfY protein	2	0	0	0	0	1	1
MSMEG_1770c	-	hypothetical protein MSMEG_1770	0	0	0	0	0	1	1
MSMEG_1771	-	methylase, putative	6	97.9	93.6	-0.06	155	0.82382	1
MSMEG_1772	-	hypothetical protein MSMEG_1772	3	143.1	169.9	0.25	33.5	0.5588	1
MSMEG_1773c	-	hypothetical protein MSMEG_1773	15	74.1	66.3	-0.16	1041	0.81231	1
MSMEG_1774c	-	hypothetical protein MSMEG_1774	5	814.7	810.7	-0.01	113	1	1
MSMEG_1775	-	cytochrome P450 monooxygenase	9	76.7	80.2	0.07	360.5	0.94697	1
MSMEG_1776c	-	ribonuclease Z	13	39.8	43.3	0.12	775	0.84642	1
MSMEG_1777	-	UsfY protein	0	0	0	0	0	1	1
MSMEG_1778c	-	hypothetical protein MSMEG_1778	3	394.9	387.9	-0.03	47	0.59624	1
MSMEG_1779c	-	hypothetical protein MSMEG_1779	3	0	0	0	0	1	1
MSMEG_1780c	-	hypothetical protein MSMEG_1780	16	290.4	298.8	0.04	1130	0.86625	1
MSMEG_1781c	-	hypothetical protein MSMEG_1781	4	17.1	17.7	0.05	71.5	1	1
MSMEG_1782c	-	oxidoreductase, short chain dehydrogenase/reductase family protein	15	396.8	388.3	-0.03	1026.5	0.91219	1
MSMEG_1783c	-	hypothetical protein MSMEG_1783	3	38.1	45.5	0.26	39	0.91623	1
MSMEG_1784c	-	type I topoisomerase	17	152.2	142.5	-0.1	1331	0.83367	1
MSMEG_1785	-	hypothetical protein MSMEG_1785	19	136.2	127.5	-0.1	1658	0.84154	1
MSMEG_1786c	-	STAS domain-containing protein	3	709.4	717.3	0.02	38	0.85982	1
MSMEG_1787	-	RsbW protein	4	44.4	49.2	0.15	69	0.87499	1
MSMEG_1788	-	hypothetical protein MSMEG_1788	3	134	168.3	0.33	38.5	0.89268	1
MSMEG_1789	-	hypothetical protein MSMEG_1789	2	75.6	92.7	0.29	17	0.93619	1
MSMEG_1790	-	hypothetical protein MSMEG_1790	3	108.3	71.9	-0.59	46	0.61554	1
MSMEG_1791	-	UsfY protein	2	0	0	0	0	1	1
MSMEG_1792c	-	hypothetical protein MSMEG_1792	3	111.1	117.4	0.08	41	1	1
MSMEG_1793c	-	membrane protein	3	0	0	0	0	1	1
MSMEG_1794	-	dehydrogenase	11	52.8	55.1	0.06	537.5	0.92851	1
MSMEG_1795c	-	2-deoxy-scyllo-inosamine dehydrogenase	9	87	86.1	-0.01	366.5	0.97726	1
MSMEG_1796c	-	membrane protein	16	353.9	355.3	0.01	1188	0.79318	1
MSMEG_1797c	-	salicylate esterase	6	129.8	148.5	0.19	157	0.88636	1
MSMEG_1798c	-	major facilitator superfamily protein	23	245.2	243.2	-0.01	2351	0.89589	1
MSMEG_1799	-	transcriptional regulator	6	146.4	144.6	-0.02	161	0.98714	1
MSMEG_1800c	-	hypothetical protein MSMEG_1800	1	0	0	0	0	1	1
MSMEG_1801	-	hypothetical protein MSMEG_1801	1	558	699.8	0.33	3	0.66252	1
MSMEG_1802	-	ChaB protein	5	0.7	0	-0.76	120	0.35065	1
MSMEG_1803	-	RsbW protein	3	108.3	135.9	0.33	38	0.83339	1
MSMEG_1804	-	RNA polymerase sigma factor SigF	3	149.9	144.5	-0.05	41	1	1
MSMEG_1805c	-	hypothetical protein MSMEG_1805	3	49.8	29.9	-0.73	42	0.92752	1
MSMEG_1806	-	hypothetical protein MSMEG_1806	5	0	0	0	0	1	1
MSMEG_1807c	-	acetyl-/propionyl-coenzyme A carboxylase alpha chain	10	0	0	0	0	1	1
MSMEG_1808c	-	Fe-S metabolism associated SufE	4	405.4	428.6	0.08	72.5	1	1
MSMEG_1809c	-	putative thiosulfate sulfurtransferase	12	219.5	242.2	0.14	604	0.62339	1
MSMEG_1810c	-	hypothetical protein MSMEG_1810	2	127.5	167.1	0.39	14.5	0.6081	1
MSMEG_1811c	maf	Maf-like protein	3	132	164.6	0.32	39	0.91623	1
MSMEG_1812c	-	hypothetical protein MSMEG_1812	1	0	0	0	0	1	1
MSMEG_1813c	-	propionyl-CoA carboxylase beta chain	24	0	0	0	0	1	1
MSMEG_1814	-	hypothetical protein MSMEG_1814	3	219.6	230.7	0.07	41	1	1
MSMEG_1815c	-	hypothetical protein MSMEG_1815	1	0	0	0	0	1	1
MSMEG_1817c	-	transmembrane protein	6	57.3	30.3	-0.92	165.5	0.88376	1
MSMEG_1818	-	membrane flanked domain-containing protein	5	71.2	74.9	0.07	112	1	1
MSMEG_1819	purK	phosphoribosylaminoimidazole carboxylase ATPase subunit	6	0	0	0	0	1	1
MSMEG_1820	purE	phosphoribosylaminoimidazole carboxylase, catalytic subunit	1	0	0	0	0	1	1
MSMEG_1821	-	acyl-CoA dehydrogenase	16	117.3	127.4	0.12	1163.5	0.92916	1
MSMEG_1822	-	biotin-	3	0	0	0	0	1	1
MSMEG_1823c	-	hypothetical protein MSMEG_1823	5	34	50.3	0.57	105	0.7562	1
MSMEG_1824c	-	transcriptional regulator, LytR family protein	9	21.7	16	-0.44	355	0.81044	1
MSMEG_1825	rfbD	dTDP-4-dehydrorhamnose reductase	17	0	0	0	0	1	1
MSMEG_1826	-	dTDP-RhA:a-D-GlcNAc-diphosphoryl polyprenol, a-3-L-rhamnosyl transferase	14	0	0	0	0	1	1
MSMEG_1827c	-	hydrolase, nudix family protein, putative	3	0	0	0	0	1	1
MSMEG_1829c	-	F420-0--gamma-glutamyl ligase	4	12.4	10.3	-0.26	83.5	0.44921	1
MSMEG_1830c	cofD	LPPG:FO 2-phospho-L-lactate transferase	10	58.4	65.4	0.16	459	0.8827	1
MSMEG_1831	-	transcription factor WhiB	5	0	0	0	0	1	1
MSMEG_1832c	-	hypothetical protein MSMEG_1832	6	114.6	121.4	0.08	157	0.86526	1
MSMEG_1833	-	hypothetical protein MSMEG_1833	2	0	0	0	0	1	1
MSMEG_1834	manB	phosphomannomutase/phosphoglucomutase	15	0	0	0	0	1	1
MSMEG_1835	-	TobH protein	8	9.5	9.5	0.01	269.5	0.56749	1
MSMEG_1836	manA	mannose-6-phosphate isomerase, class I	8	0	0	0	0	1	1
MSMEG_1837c	-	secreted protein	14	123.8	132.4	0.1	878	0.97023	1
MSMEG_1838	-	cationic amino acid transporter	19	204.7	156.8	-0.39	1650	0.87764	1
MSMEG_1839	-	alkane 1-monooxygenase	22	273.6	275.5	0.01	2173	0.98317	1
MSMEG_1840	-	rubredoxin	3	3.3	0.8	-2.01	41	1	1
MSMEG_1841	-	rubredoxin	2	0	0	0	0	1	1
MSMEG_1842	-	transcriptional regulator, TetR family protein	9	83	95.8	0.21	357.5	0.90168	1
MSMEG_1844c	-	hypothetical protein MSMEG_1844	6	35.7	39.3	0.14	153	0.69714	1
MSMEG_1845c	-	YghA protein	6	272.9	333.6	0.29	162	0.98496	1
MSMEG_1846c	-	polysulphide reductase, NrfD	11	68.3	67.3	-0.02	554	0.89692	1
MSMEG_1847c	-	4Fe-4S ferredoxin, iron-sulfur binding protein	11	63.1	52.8	-0.26	545.5	0.99239	1
MSMEG_1849c	selB	selenocysteine-specific translation elongation factor	8	140.7	170.7	0.28	286	0.96756	1
MSMEG_1850c	selA	selenocysteine synthase	7	51	41.7	-0.29	221	1	1
MSMEG_1852	selD	selenide, water dikinase	10	62.1	71.9	0.21	420	0.62966	1
MSMEG_1854	-	valosin containing protein-1	12	134.4	137	0.03	639.5	0.91654	1
MSMEG_1855	-	TPR repeat-containing protein	16	118.2	136.7	0.21	1078.5	0.56742	1
MSMEG_1856c	-	hypothetical protein MSMEG_1856	11	102.7	100	-0.04	536	0.91001	1
MSMEG_1857	-	transposase IstA protein, putative	15	26.2	27.4	0.07	1020	0.9369	1
MSMEG_1858	-	putative transposition helper protein	9	8.4	10.5	0.33	363.5	0.99052	1
MSMEG_1859c	-	hypothetical protein MSMEG_1859	5	14.5	27.4	0.92	108	0.81233	1
MSMEG_1860c	-	hypothetical protein MSMEG_1860	4	58.6	50.3	-0.22	75.5	0.84666	1
MSMEG_1861c	-	hypothetical protein MSMEG_1861	12	33.5	43.7	0.38	651	0.97286	1
MSMEG_1862c	-	transposase	17	229.9	230.6	0	1278	0.88292	1
MSMEG_1863c	-	putative transposase	6	216.4	243.9	0.17	150	0.71497	1
MSMEG_1864c	-	transposase	2	69	70	0.02	17.5	1	1
MSMEG_1865	-	IS1549, transposase	16	568.6	545	-0.06	1177	0.85725	1
MSMEG_1866c	-	transposase B	8	84.7	56.2	-0.59	299	0.77586	1
MSMEG_1867c	-	transposase	3	43.4	50.4	0.22	41	1	1
MSMEG_1868c	-	hypothetical protein MSMEG_1868	9	0	0	0	0	1	1
MSMEG_1869c	-	hypothetical protein MSMEG_1869	20	225.6	198.4	-0.19	1752	0.78749	1
MSMEG_1870c	-	hypothetical protein MSMEG_1870	51	91	83.3	-0.13	11796.5	0.88648	1
MSMEG_1871c	-	hypothetical protein MSMEG_1871	3	50.6	71.8	0.5	34	0.58519	1
MSMEG_1872c	-	hypothetical protein MSMEG_1872	5	111.7	153.4	0.46	110	0.9055	1
MSMEG_1873	-	thymidylate kinase	10	0	0	0	0	1	1
MSMEG_1874	mtrA	DNA-binding response regulator MtrA	4	0	0	0	0	1	1
MSMEG_1875	-	sensor histidine kinase MtrB	8	0	0	0	0	1	1
MSMEG_1876	-	lipoprotein LpqB	14	2.1	0	-1.61	945	0.08203	1
MSMEG_1877	-	hypothetical protein MSMEG_1877	2	0	0	0	0	1	1
MSMEG_1878	-	S30AE family protein	8	131.9	123.9	-0.09	274.5	0.78079	1
MSMEG_1879c	-	hypothetical protein MSMEG_1879	3	332.5	379.7	0.19	36	0.72393	1
MSMEG_1880c	-	hypothetical protein MSMEG_1880	6	11.6	17.2	0.56	158.5	0.90433	1
MSMEG_1881	secA	preprotein translocase subunit SecA	36	3.9	5.9	0.59	5830.5	0.9939	1
MSMEG_1882	-	acyltransferase, ws/dgat/mgat subfamily protein	16	506.7	514	0.02	1128	0.86207	1
MSMEG_1883	-	glycine betaine transporter OpuD	15	230.1	259	0.17	999	0.90932	1
MSMEG_1884	-	hypothetical protein MSMEG_1884	5	292.2	280.8	-0.06	118	0.8303	1
MSMEG_1885	-	2Fe-2S iron-sulfur cluster binding domain-containing protein	7	4.1	5.5	0.43	242	0.49452	1
MSMEG_1886	-	Fatty acid desaturase	15	5.2	6.2	0.26	942	0.44596	1
MSMEG_1887	-	hypothetical protein MSMEG_1887	2	0	0	0	0	1	1
MSMEG_1888c	-	methyltransferase	7	11.1	6.4	-0.8	223	0.93412	1
MSMEG_1889c	-	putative ribosome small subunit-dependent GTPase RsgA	4	0	0	0	0	1	1
MSMEG_1890c	aroA	3-phosphoshikimate 1-carboxyvinyltransferase	4	0	0	0	0	1	1
MSMEG_1891	-	hypothetical protein MSMEG_1891	3	72.6	56.3	-0.37	44.5	0.75292	1
MSMEG_1892	-	transferase	11	21.1	23.7	0.17	566.5	0.6997	1
MSMEG_1893c	-	UbiE/COQ5 methyltransferase	2	0	0	0	0	1	1
MSMEG_1894c	-	short chain dehydrogenase	10	12.4	22.5	0.86	444	0.90734	1
MSMEG_1895c	-	HTH-type transcriptional regulator AlsR	7	191	199.1	0.06	219	0.97963	1
MSMEG_1896	-	acetyl-CoA acetyltransferase	6	2.1	0.8	-1.38	172	0.53071	1
MSMEG_1897	pcaD	3-oxoadipate enol-lactonase	6	89.9	80.1	-0.17	161	0.98496	1
MSMEG_1898	-	succinyl-CoA:3-ketoacid-coenzyme A transferase 1, precursor	3	157.4	194.5	0.31	35	0.64922	1
MSMEG_1899	-	succinyl-CoA:3-ketoacid-coenzyme A transferase subunit B	3	65	58.6	-0.15	41	1	1
MSMEG_1900c	-	D-alanyl-D-alanine carboxypeptidase family protein	3	238.5	257.9	0.11	39	0.91623	1
MSMEG_1901c	-	DNA-binding HTH domain-containing protein	18	99	104.3	0.08	1469	0.94063	1
MSMEG_1902c	-	transcriptional regulator	6	339.6	311.5	-0.12	170	0.80797	1
MSMEG_1903c	-	caib/baif family protein	15	29.8	36.5	0.29	1009	0.97236	1
MSMEG_1904c	-	acyl-CoA dehydrogenase	11	53.9	32.3	-0.74	557.5	0.84375	1
MSMEG_1905c	-	acyl-CoA dehydrogenase protein	10	22.7	28.5	0.33	441.5	0.88399	1
MSMEG_1906c	-	toluate 1,2-dioxygenase electron transfer component	31	115.9	126.6	0.13	4288.5	0.90727	1
MSMEG_1907c	-	toluate 1,2-dioxygenase beta subunit	13	197.5	212.7	0.11	746.5	0.8751	1
MSMEG_1908c	-	benzoate 1,2-dioxygenase alpha subunit	17	38.2	63.3	0.73	1229	0.581	1
MSMEG_1909	-	putative HTH-type transcriptional regulator YnfL	7	50.1	44.7	-0.16	223.5	0.93713	1
MSMEG_1910	-	muconate cycloisomerase	11	48	54.6	0.19	536.5	0.91485	1
MSMEG_1911	catA	catechol 1,2-dioxygenase	9	175.7	174.9	-0.01	353.5	0.85315	1
MSMEG_1912	-	muconolactone delta-isomerase 1	4	45.5	63.6	0.48	65	0.70222	1
MSMEG_1913c	ybaK	YbaK/ebsC protein	3	81	90.6	0.16	39	0.91623	1
MSMEG_1914	-	RNA polymerase sigma-70 factor, family protein	10	376.1	308.9	-0.28	478.5	0.66231	1
MSMEG_1915	-	anti-sigma factor, family protein	3	58.4	56.5	-0.05	41	1	1
MSMEG_1916c	-	hypothetical protein MSMEG_1916	1	33.5	31	-0.11	3	0.66252	1
MSMEG_1917	-	putative acetyl-CoA carboxylase biotin carboxyl carrier protein subunit	0	0	0	0	0	1	1
MSMEG_1918	-	sensor histidine kinase	5	0	0	0	0	1	1
MSMEG_1919c	-	transcription factor WhiB	0	0	0	0	0	1	1
MSMEG_1920c	-	diacylglycerol kinase, catalytic region	6	148.6	157.6	0.08	160	0.96143	1
MSMEG_1921c	-	SecC motif-containing protein	5	271.2	307.1	0.18	109	0.90096	1
MSMEG_1922	aroQ	3-dehydroquinate dehydratase, type II	6	0	0	0	0	1	1
MSMEG_1923	-	membrane protein	5	30.7	71.7	1.22	100.5	0.59019	1
MSMEG_1924c	-	N-acetyltransferase Ats1	5	116.4	112.7	-0.05	118	0.83417	1
MSMEG_1925c	-	isochorismate synthase DhbC	6	0	0	0	0	1	1
MSMEG_1926c	-	acid phosphatase	4	32.2	37	0.2	70.5	0.9395	1
MSMEG_1927	-	cobyrinic acid a,c-diamide synthase	8	618.1	526.8	-0.23	309	0.64489	1
MSMEG_1928	-	regulatory protein	3	10.4	12.6	0.29	36	0.65487	1
MSMEG_1929c	-	hypothetical protein MSMEG_1929	12	52.1	65.5	0.33	589	0.48829	1
MSMEG_1930c	-	DEAD/DEAH box helicase	13	16	8.1	-0.99	789	0.73871	1
MSMEG_1931	-	hypothetical protein MSMEG_1931	8	96.9	94	-0.04	289	0.99121	1
MSMEG_1932c	-	MmpS3 protein	14	135.4	111.3	-0.28	911	0.79457	1
MSMEG_1933	-	hypothetical protein MSMEG_1933	1	0	11.9	3.69	3	0.50499	1
MSMEG_1934	-	ATP-binding protein	1	94.6	133.1	0.49	2	0.38273	1
MSMEG_1935c	-	TetR-family protein transcriptional regulator	10	0.8	1.3	0.65	436	0.67714	1
MSMEG_1936	-	hypothetical protein MSMEG_1936	14	89.9	90.1	0	866	0.88553	1
MSMEG_1937	-	molybdopterin biosynthesis-like protein MoeZ	15	33.9	43.6	0.36	1010.5	0.98044	1
MSMEG_1938	-	hypothetical protein MSMEG_1938	9	36.4	33.9	-0.1	368	0.95404	1
MSMEG_1939c	-	6-O-methylguanine DNA methyltransferase	2	130.7	135.6	0.05	17.5	1	1
MSMEG_1940c	-	hydrolase, alpha/beta fold family protein	3	118	135.1	0.2	36	0.70592	1
MSMEG_1941	-	helicase, UvrD/Rep family protein	11	25.3	26.6	0.07	558	0.8203	1
MSMEG_1942c	-	integral membrane protein	4	20.1	13.6	-0.56	74.5	0.87935	1
MSMEG_1943	-	ATP-dependent DNA helicase	20	4.9	4.4	-0.15	1775	0.83205	1
MSMEG_1944c	-	membrane protein	4	188.1	153.8	-0.29	74.5	0.90803	1
MSMEG_1945	-	ion channel membrane protein	12	8.5	15.2	0.84	608	0.55851	1
MSMEG_1946	nudC	NADH pyrophosphatase	7	235.3	228.2	-0.04	218.5	0.96864	1
MSMEG_1947c	-	hypothetical protein MSMEG_1947	5	499.5	489.2	-0.03	116	0.89768	1
MSMEG_1948c	-	hypothetical protein MSMEG_1948	2	0	0	0	0	1	1
MSMEG_1949	-	hypothetical protein MSMEG_1949	0	0	0	0	0	1	1
MSMEG_1950	-	hypothetical protein MSMEG_1950	2	141.9	166.2	0.23	14	0.57517	1
MSMEG_1951	-	hypothetical protein MSMEG_1951	2	253.1	301.4	0.25	19	0.93619	1
MSMEG_1952	-	ATP-dependent DNA helicase	18	39.1	39.5	0.01	1456	0.98652	1
MSMEG_1953	-	transcription factor WhiB	1	0	0	0	0	1	1
MSMEG_1954c	-	ABC1 family protein	11	67.1	66.6	-0.01	558	0.81027	1
MSMEG_1955c	-	hypothetical protein MSMEG_1955	5	31.8	36.8	0.21	111	0.95267	1
MSMEG_1956	-	hypothetical protein MSMEG_1956	3	220.6	224.5	0.03	39	0.91623	1
MSMEG_1957c	-	hypothetical protein MSMEG_1957	2	50.5	43.5	-0.22	22	0.57517	1
MSMEG_1958	-	PDZ domain-containing protein	6	30.2	32.6	0.11	154	0.7826	1
MSMEG_1959	-	hypothetical protein MSMEG_1959	58	31.4	38.3	0.29	15076	0.94109	1
MSMEG_1960	-	hypothetical protein MSMEG_1960	3	138.6	127.9	-0.12	41	1	1
MSMEG_1961	-	hypothetical protein MSMEG_1961	14	108.7	102.1	-0.09	905	0.8234	1
MSMEG_1962	-	hypothetical protein MSMEG_1962	6	22.3	19	-0.23	160	0.95489	1
MSMEG_1963	-	putative transcriptional regulatory protein	25	88.5	81.9	-0.11	2798	0.95115	1
MSMEG_1964	-	mitomycin radical oxidase	12	17.9	17.8	-0.01	664	0.82788	1
MSMEG_1966c	-	hypothetical protein MSMEG_1966	4	98.3	84.2	-0.22	74.5	0.90737	1
MSMEG_1967	-	TetR-family protein transcriptional regulator	10	137.7	182.2	0.4	394	0.40821	1
MSMEG_1968c	-	putative oxidoreductase	6	269.7	267.1	-0.01	166	0.90771	1
MSMEG_1969	-	MerR-family protein transcriptional regulator	6	62.9	71.5	0.18	170	0.79726	1
MSMEG_1970c	-	sigma factor	18	548.2	539.9	-0.02	1485	0.85803	1
MSMEG_1971	-	propane monooxygenase hydroxylase large subunit	32	125	123.1	-0.02	4604	0.99046	1
MSMEG_1972	-	methane monooxygenase component C	14	73.5	56.7	-0.37	946	0.53165	1
MSMEG_1974	-	propane monooxygenase coupling protein	4	34.6	21.3	-0.7	79	0.5972	1
MSMEG_1975	-	amidohydrolase 2	27	88.4	102.7	0.22	3292	0.96536	1
MSMEG_1976	-	hypothetical protein MSMEG_1976	10	71.7	64.5	-0.15	457.5	0.89841	1
MSMEG_1977	-	alcohol dehydrogenase	9	7.2	6.7	-0.11	380	0.71229	1
MSMEG_1978	groEL	chaperonin GroEL	8	185.7	166.7	-0.16	306	0.6997	1
MSMEG_1979	-	antibiotic biosynthesis monooxygenase	3	14.7	15.8	0.1	41	1	1
MSMEG_1980c	-	hypothetical protein MSMEG_1980	20	118.3	115.1	-0.04	1813	0.94482	1
MSMEG_1981c	-	hypothetical protein MSMEG_1981	5	37.8	30.8	-0.29	113.5	0.97875	1
MSMEG_1982	-	acyl-CoA synthase	18	43.7	51.3	0.23	1445	0.91594	1
MSMEG_1983c	-	major facilitator family protein transporter	12	52.7	62.7	0.25	643.5	0.95276	1
MSMEG_1984c	-	haloacetate dehalogenase H-1	9	108	102.6	-0.07	367	0.9671	1
MSMEG_1985	-	transcriptional regulator, LysR family protein	11	37.3	49.5	0.41	540.5	0.93689	1
MSMEG_1986	-	tartrate dehydrogenase	12	77.5	82.1	0.08	647	0.99464	1
MSMEG_1987	-	hypothetical protein MSMEG_1987	8	70.1	85.1	0.28	277.5	0.82212	1
MSMEG_1988	-	hypothetical protein MSMEG_1988	2	0	0	0	0	1	1
MSMEG_1989	-	phenoxybenzoate dioxygenase beta subunit	12	90.7	97.6	0.11	634	0.84981	1
MSMEG_1990	-	hypothetical protein MSMEG_1990	18	47.2	51.2	0.12	1513	0.69465	1
MSMEG_1991	-	isovaleryl-CoA dehydrogenase	16	115	123.4	0.1	1162	0.93618	1
MSMEG_1992	-	L-carnitine dehydratase/bile acid-inducible protein F	8	28.8	32.4	0.17	287.5	1	1
MSMEG_1993	-	MaoC like domain-containing protein	7	190.8	188.7	-0.02	220.5	0.98741	1
MSMEG_1994	-	HpcH/HpaI aldolase	2	0	0	0	0	1	1
MSMEG_1995c	-	transcriptional regulator MdcY family protein	4	3.9	0.7	-2.43	72.5	1	1
MSMEG_1996	-	N5,N10- methylenetetrahydromethanopterin reductase-related protein	10	561.4	554.4	-0.02	410	0.54612	1
MSMEG_1997	-	N-acyl-D-glutamate amidohydrolase	14	55.7	62.3	0.16	897	0.88786	1
MSMEG_1998	-	hydrolase, alpha/beta fold family protein	13	108.7	106.9	-0.02	739	0.80879	1
MSMEG_1999c	-	hypothetical protein MSMEG_1999	1	0	0	0	0	1	1
MSMEG_2000c	-	hypothetical protein MSMEG_2000	7	142.4	107.2	-0.41	224	0.9357	1
MSMEG_2001c	-	sugar transporter	7	143.4	141.5	-0.02	223	0.95552	1
MSMEG_2002	-	IS1096, tnpR protein	10	739.9	600.8	-0.3	459	0.89991	1
MSMEG_2003c	-	IS1096, tnpA protein	9	1811.8	1959.2	0.11	381	0.78145	1
MSMEG_2004c	-	arabinose-proton symporter	10	156	133.4	-0.23	480.5	0.6492	1
MSMEG_2005c	-	sugar phosphate isomerase/epimerase	8	54.3	67.3	0.31	272	0.73479	1
MSMEG_2006c	-	2,3-dihydroxybiphenyl 1,2-dioxygenase	9	1869.7	1910.8	0.03	371	0.90153	1
MSMEG_2007c	-	putative HpcE protein	6	51.1	58.4	0.19	155.5	0.83921	1
MSMEG_2008	-	hypothetical protein MSMEG_2008	3	0	0	0	0	1	1
MSMEG_2009	-	regulatory protein GntR, HTH:GntR, C-	6	29.8	43.5	0.54	160.5	0.96113	1
MSMEG_2010c	-	stress responsive A/B barrel domain superfamily protein	6	14.2	27	0.93	150	0.66452	1
MSMEG_2011c	-	transcriptional regulator, LacI family protein	9	13.8	7.3	-0.92	375.5	0.80289	1
MSMEG_2012	hisD	histidinol dehydrogenase	13	18.4	12.7	-0.54	747	0.85726	1
MSMEG_2013	-	oxidoreductase, short chain dehydrogenase/reductase family protein	5	6	8.9	0.57	104	0.65442	1
MSMEG_2014c	-	molybdenum import ATP-binding protein ModC	6	61.1	61.6	0.01	164	0.95489	1
MSMEG_2015c	modB	molybdate ABC transporter, permease protein	7	78.8	98.9	0.33	220	1	1
MSMEG_2016c	modA	molybdate ABC transporter, periplasmic molybdate-binding protein	3	0	0	0	0	1	1
MSMEG_2017c	-	transcriptional regulator, MerR family protein	2	0	0	0	0	1	1
MSMEG_2019	-	short-chain dehydrogenase/reductase SDR	2	3	2.7	-0.13	19	0.9241	1
MSMEG_2021	-	lipopolysaccharide biosynthesis acyltransferase, M	28	105	98.1	-0.1	3481.5	0.87052	1
MSMEG_2022	-	GntT protein, putative	5	207.4	185.5	-0.16	110	0.92935	1
MSMEG_2023	-	CAIB/BAIF family protein	16	15.1	13.3	-0.19	1202	0.62223	1
MSMEG_2024	-	hydroxymethylglutaryl-CoA lyase	2	171.6	147.6	-0.22	19.5	0.86428	1
MSMEG_2025	-	putative IclR family protein transcriptional regulator	6	70.5	62.5	-0.17	163.5	0.96113	1
MSMEG_2026	-	short chain dehydrogenase	7	118.5	100	-0.24	224.5	0.91207	1
MSMEG_2027c	-	hypothetical protein MSMEG_2027	7	1007.7	848.8	-0.25	204	0.68383	1
MSMEG_2028c	-	chloramphenicol resistance protein	10	47.6	32.7	-0.54	455	0.92413	1
MSMEG_2029c	-	3-ketoacyl-ACP/CoA redutase	3	0	0	0	0	1	1
MSMEG_2030	-	transcriptional regulator, TetR family protein	5	41	64.4	0.65	110.5	0.944	1
MSMEG_2031c	-	hypothetical protein MSMEG_2031	0	0	0	0	0	1	1
MSMEG_2032	-	hypothetical protein MSMEG_2032	8	46.1	40.5	-0.19	291.5	0.91427	1
MSMEG_2033c	-	oxidoreductase, zinc-binding dehydrogenase family protein	7	22.1	22	-0.01	230	0.72728	1
MSMEG_2034	-	aryl-alcohol dehydrogenase	3	0	0	0	0	1	1
MSMEG_2035c	-	amine oxidase	13	73.5	66	-0.16	779	0.83569	1
MSMEG_2036	-	hydrolase, alpha/beta fold family protein	8	0	0	0	0	1	1
MSMEG_2037	-	hypothetical protein MSMEG_2037	11	296.1	285.9	-0.05	537.5	0.93022	1
MSMEG_2038	-	monooxygenase, flavin-binding family protein	27	173.6	151.6	-0.2	3333	0.82538	1
MSMEG_2039c	-	putative transcriptional regulator	6	0	0	0	0	1	1
MSMEG_2040	-	hypothetical protein MSMEG_2040	6	3	3.6	0.25	153	0.65474	1
MSMEG_2042c	-	phosphotransferase enzyme family protein	13	62.3	66	0.08	774	0.87836	1
MSMEG_2043	-	transcriptional regulator, TetR family protein	4	39.4	63.2	0.68	62	0.55779	1
MSMEG_2044	-	integral membrane transport protein	18	126.5	126.5	0	1464	0.97038	1
MSMEG_2045	-	monoxygenase	19	74.1	73.3	-0.02	1547	0.60588	1
MSMEG_2046	-	GlcNAc-PI de-N-acetylase family protein	10	75.6	65.7	-0.2	476.5	0.62138	1
MSMEG_2047c	-	enoyl-CoA hydratase	6	43.3	49.4	0.19	153	0.77095	1
MSMEG_2048	-	alcohol dehydrogenase	3	0	0	0	0	1	1
MSMEG_2049	-	putative transcriptional regulator, TetR family protein	10	74.4	70.5	-0.08	452.5	0.97269	1
MSMEG_2050c	nuoN	NADH dehydrogenase subunit N	17	45.6	51.9	0.19	1296.5	0.97487	1
MSMEG_2051c	nuoM	NADH dehydrogenase subunit M	22	39.3	27.3	-0.52	2192	0.92721	1
MSMEG_2052c	nuoL	NADH dehydrogenase subunit L	20	52	47.3	-0.14	1804.5	0.97518	1
MSMEG_2053c	nuoK	NADH dehydrogenase subunit K	2	19.4	25.1	0.37	16.5	0.86428	1
MSMEG_2054c	-	NADH dehydrogenase subunit J	7	17.7	22.9	0.37	220.5	0.98741	1
MSMEG_2055c	nuoI	NADH dehydrogenase subunit I	14	19.1	15.8	-0.27	891	0.9189	1
[truncated: 4,723 more rows]
