# Supplementary figures and images for: A cell wall synthase accelerates plasma membrane partitioning in mycobacteria
Source: eLife journal article supplement (doi:10.7554/elife.81924), 2023-09-04

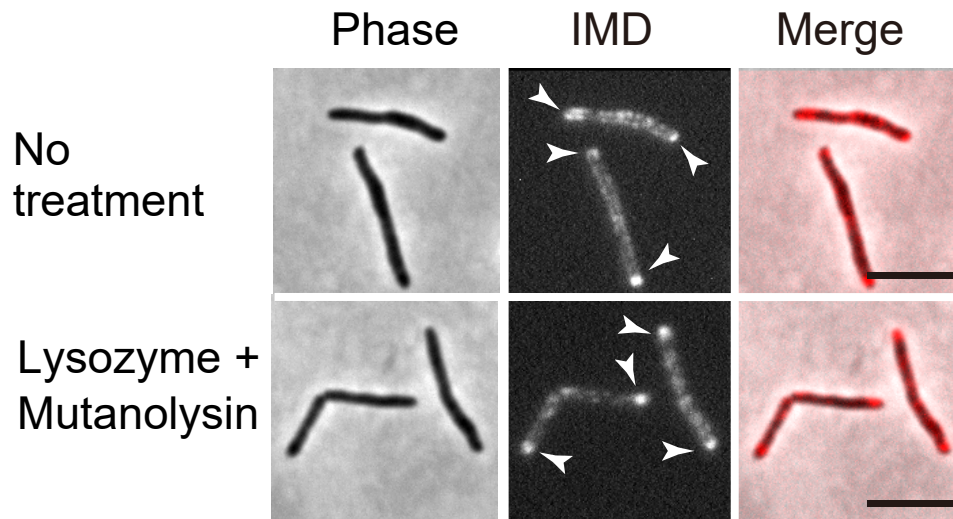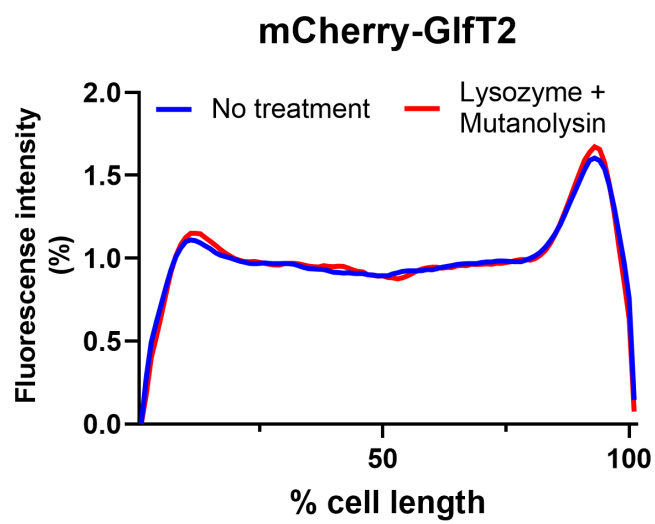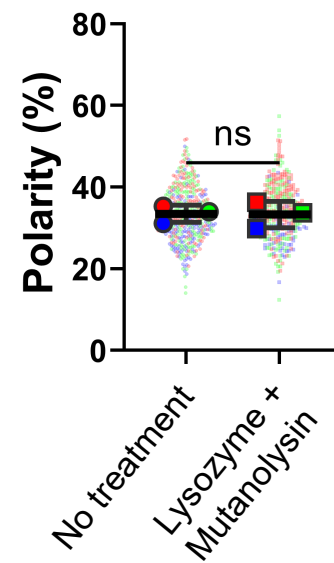

Supplement: supp [file elife-81924-supp-v1.zip]

## Recovery of wild-type

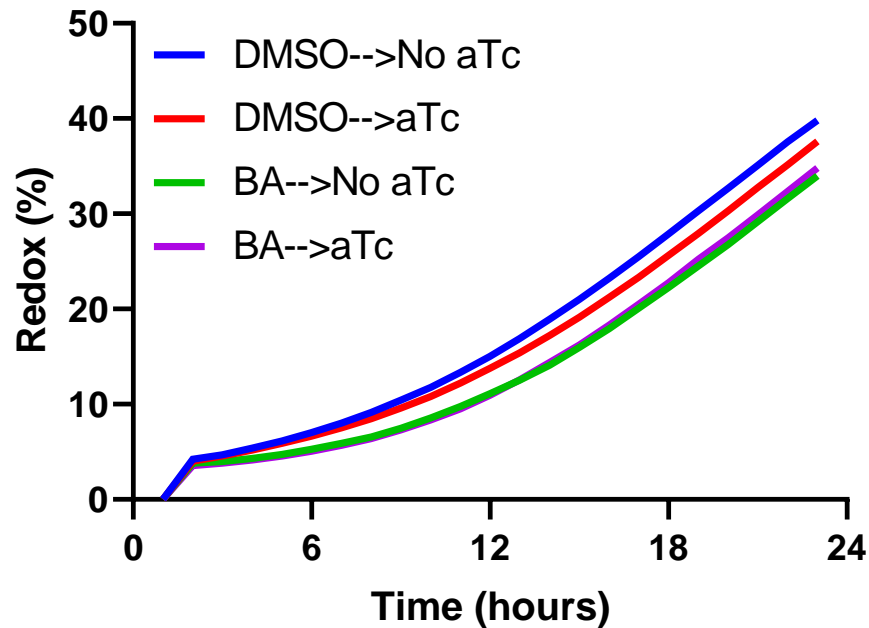

## Recovery of DivIVA mutant

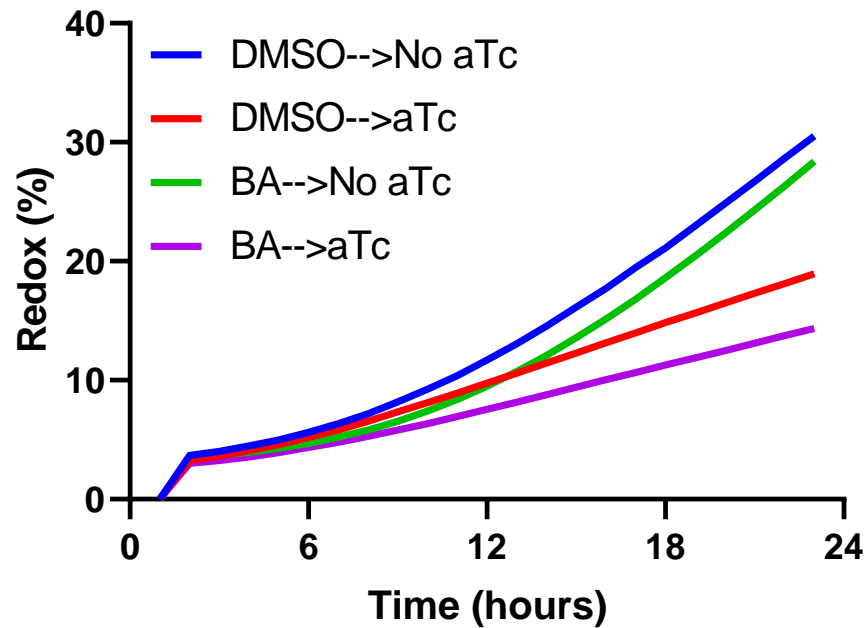

Supplement: supp [file elife-81924-supp-v1.zip]

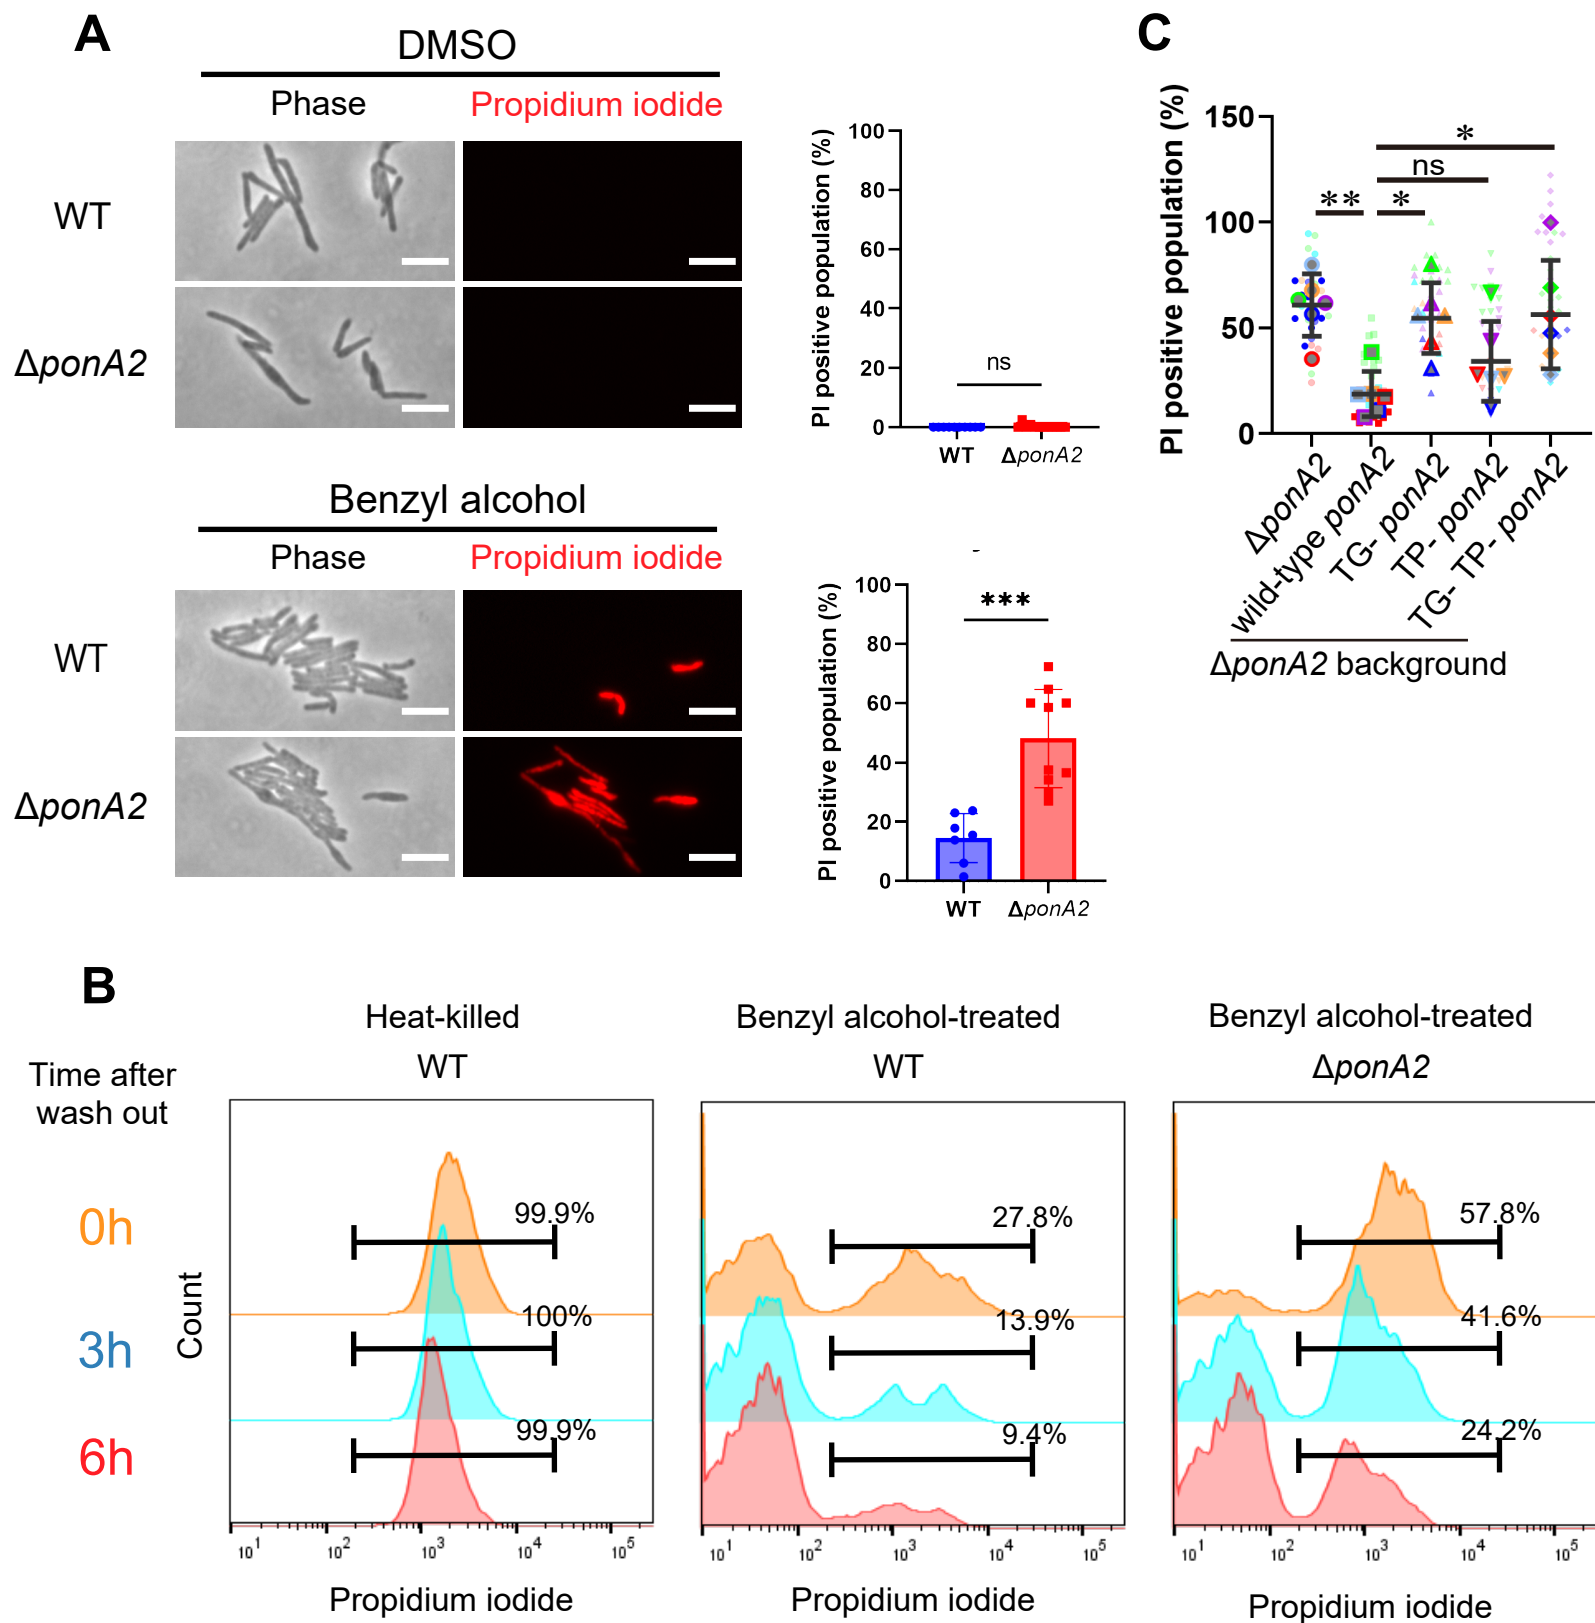

Supplement: supp [file elife-81924-supp-v1.zip]

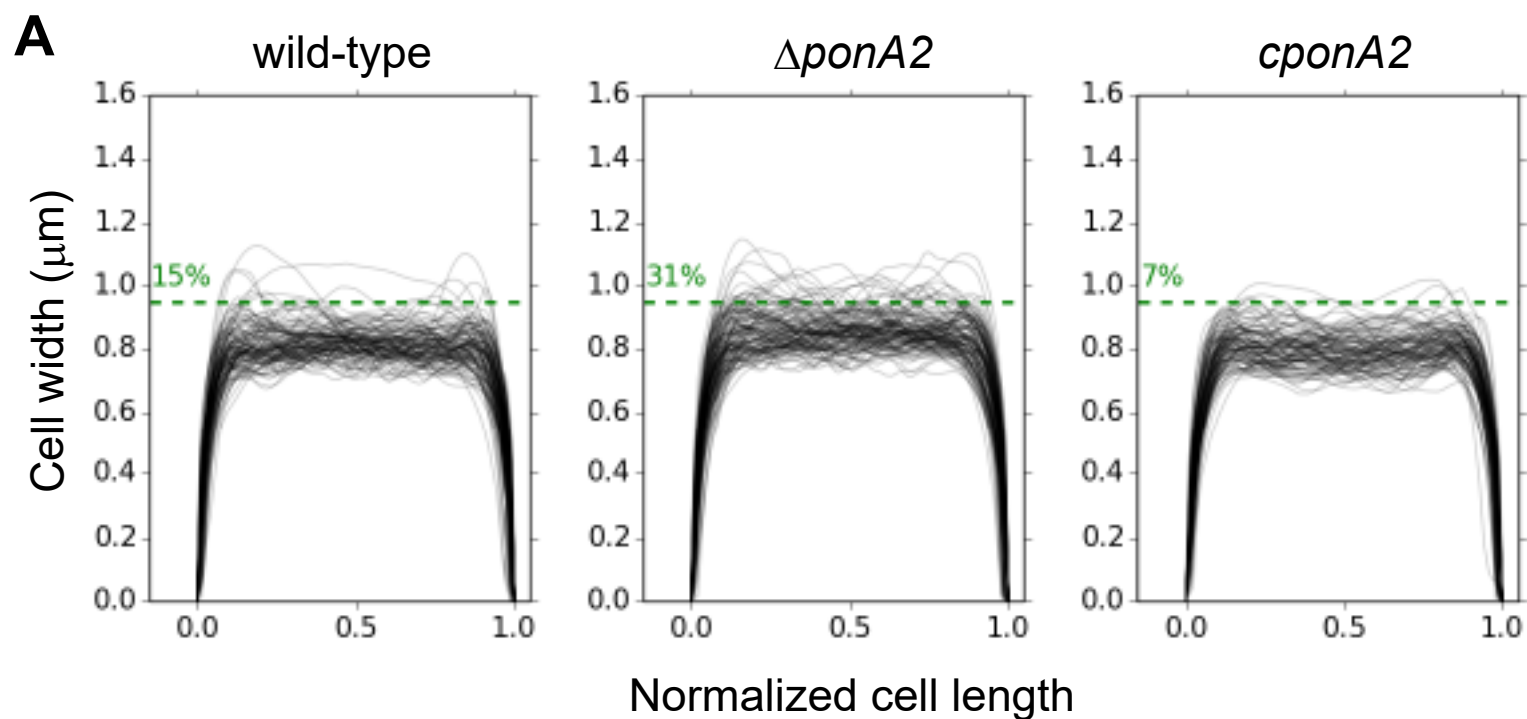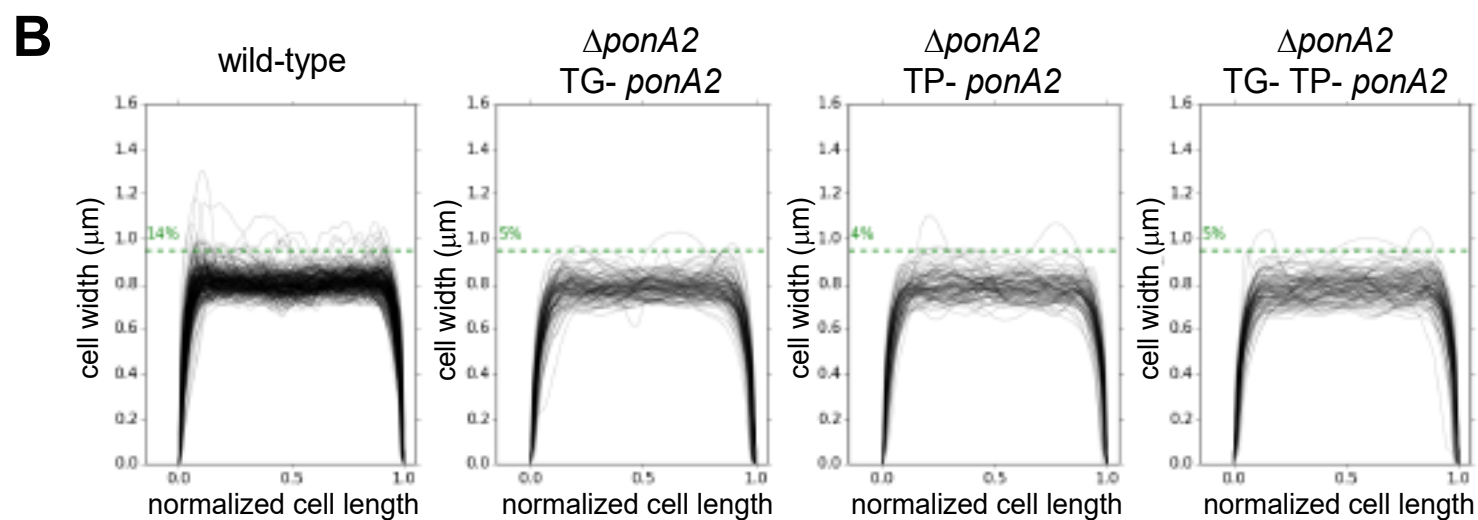

Supplement: supp [file elife-81924-supp-v1.zip]

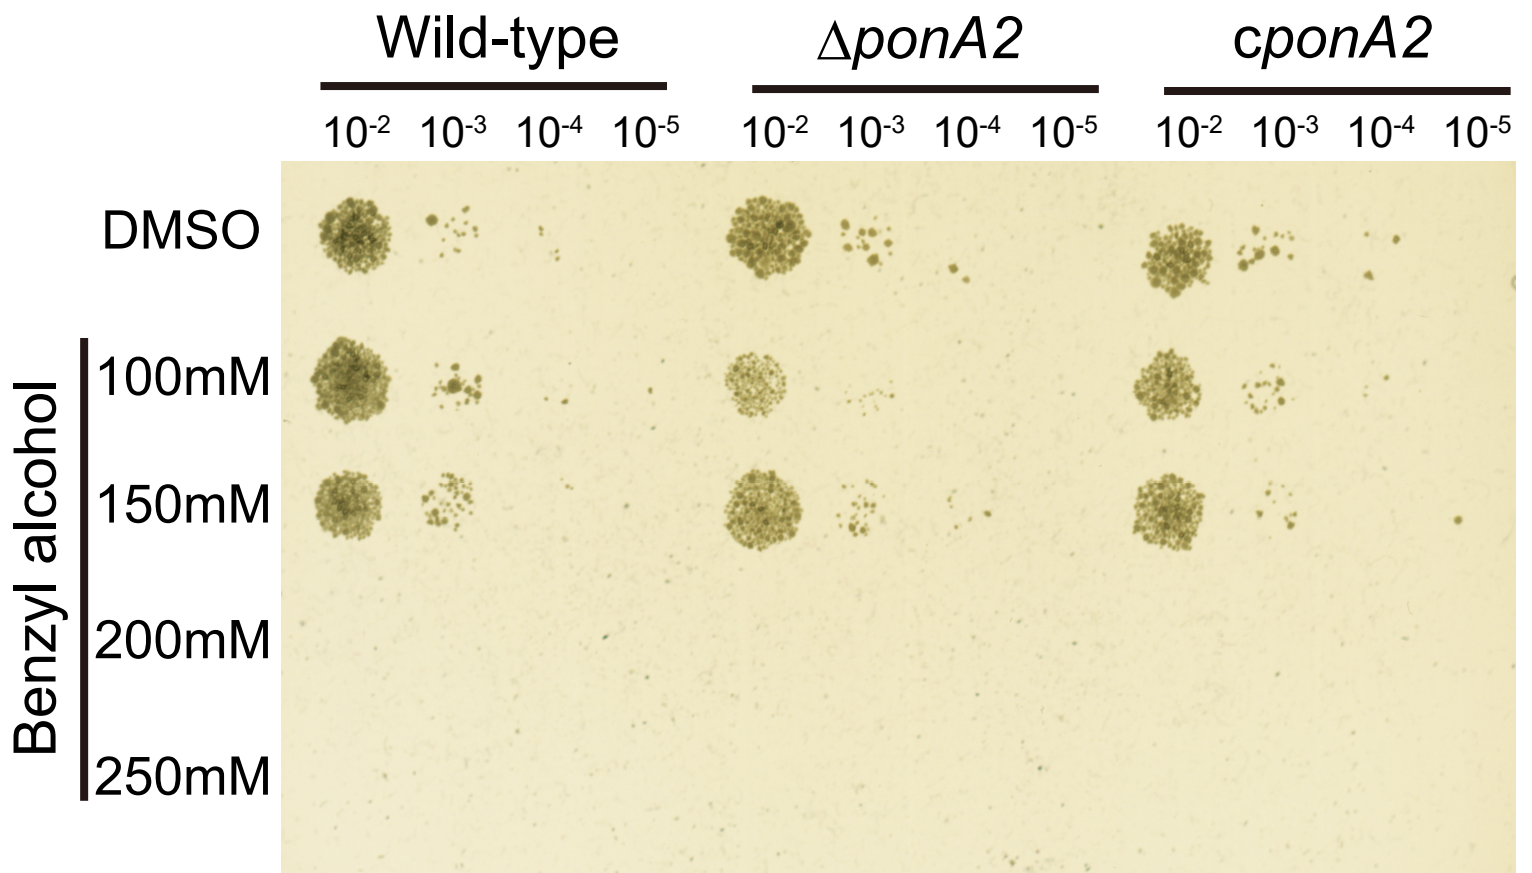

Supplement: supp [file elife-81924-supp-v1.zip]
